# Supplementary material
Source: ML conference proceedings conference paper supplement (https://openreview.net/forum?id=V6IgkYKD8P)
Supplement: supplementary_material [file attachment]

|     |                                                                                   |           |
|-----|-----------------------------------------------------------------------------------|-----------|
| 356 | <b>Contents</b>                                                                   |           |
| 357 | <b>1 Introduction</b>                                                             | <b>1</b>  |
| 358 | <b>2 Background on Diffusion Probabilistic Models</b>                             | <b>2</b>  |
| 359 | <b>3 Accelerating Optimal Quality Solvers for Diffusion SDEs</b>                  | <b>3</b>  |
| 360 | <b>4 Higher Stage SEEDS for DPMs</b>                                              | <b>5</b>  |
| 361 | <b>5 Experiments</b>                                                              | <b>7</b>  |
| 362 | <b>6 Conclusions</b>                                                              | <b>9</b>  |
| 363 | <b>A Detailed Derivation of the SEEDS Design Space</b>                            | <b>13</b> |
| 364 | A.1 The Isotropic General SDE framework . . . . .                                 | 13        |
| 365 | A.2 Re-framing and Generalizing Previous Exponential Solvers . . . . .            | 15        |
| 366 | A.2.1 The VP case . . . . .                                                       | 15        |
| 367 | A.2.2 Proof of Proposition 3.1 . . . . .                                          | 15        |
| 368 | A.2.3 Proof of Proposition 4.2 . . . . .                                          | 16        |
| 369 | A.2.4 Generalization to the remaining data prediction and deterministic modes . . | 17        |
| 370 | A.2.5 Proof of Proposition 4.4 . . . . .                                          | 18        |
| 371 | A.2.6 The VE, DDIM and iDDPM cases . . . . .                                      | 20        |
| 372 | A.2.7 The EDM case . . . . .                                                      | 20        |
| 373 | A.2.8 Proof of Proposition 3.2 . . . . .                                          | 21        |
| 374 | <b>B Convergence Proofs</b>                                                       | <b>22</b> |
| 375 | B.1 Preliminaries . . . . .                                                       | 23        |
| 376 | B.2 Convergence of SEEDS-1 . . . . .                                              | 25        |
| 377 | B.2.1 Strong Itô-Taylor approximation . . . . .                                   | 25        |
| 378 | B.2.2 Continuous approximation of SEEDS-1 . . . . .                               | 25        |
| 379 | B.2.3 Proof of Theorem 4.1 . . . . .                                              | 27        |
| 380 | B.2.4 Discrete-time approximation . . . . .                                       | 29        |
| 381 | B.2.5 Useful Lemmas . . . . .                                                     | 30        |
| 382 | B.3 Proof of Corollary 4.3 . . . . .                                              | 31        |
| 383 | B.3.1 Convergence of SEEDS-2: . . . . .                                           | 31        |
| 384 | B.3.2 Convergence of SEEDS-3: . . . . .                                           | 32        |
| 385 | <b>C Implementation Details</b>                                                   | <b>33</b> |
| 386 | C.1 Stabilization of the exponential terms . . . . .                              | 34        |
| 387 | C.2 Noise schedules parameterizations . . . . .                                   | 34        |
| 388 | C.3 EDM discretization . . . . .                                                  | 35        |
| 389 | C.4 Final sampling step . . . . .                                                 | 35        |

|     |                                                              |           |
|-----|--------------------------------------------------------------|-----------|
| 390 | <b>D Reminders on Stochastic Exponential Integrators</b>     | <b>35</b> |
| 391 | <b>D.1 Derivative-free exponential ODE schemes</b>           | 35        |
| 392 | <b>D.1.1 Runge-Kutta approach</b>                            | 35        |
| 393 | <b>D.1.2 Exponential Runge-Kutta approach</b>                | 36        |
| 394 | <b>D.2 Derivative-free exponential SDE schemes</b>           | 39        |
| 395 | <b>D.2.1 Strong and Weak Stochastic Runge-Kutta approach</b> | 40        |
| 396 | <b>D.2.2 Truncated Itô-Taylor expansions</b>                 | 41        |
| 397 | <b>D.2.3 Integral approximations</b>                         | 43        |
| 398 | <b>E Experiment Details</b>                                  | <b>44</b> |
| 399 | <b>E.1 Pre-trained model specifications</b>                  | 44        |
| 400 | <b>E.2 Noise vs. Data Prediction approaches</b>              | 45        |
| 401 | <b>E.3 Low vs. High stage Solvers</b>                        | 45        |
| 402 | <b>E.4 Deterministic vs. Stochastic Solver</b>               | 45        |
| 403 | <b>E.5 Hardware configuration</b>                            | 46        |
| 404 | <b>E.6 Licences</b>                                          | 46        |
| 405 | <b>E.7 Supporting samples</b>                                | 47        |

## 406 A Detailed Derivation of the SEEDS Design Space

407 In Sections 2 and 3 we proposed a simplified presentation of the design space of diffusion models  
408 and of the ingredients that constitute our proposed SEEDS methodology. In this section, we further  
409 develop our presentation in a technical manner, making explicit the formalization of our design  
410 choices.

### 411 A.1 The Isotropic General SDE framework

412 In Section 2, we presented a parametric family of differential equations (2) driving the generative  
413 process for DPMs, based on time-reversing the forward noising diffusion process (1). While doing  
414 so, we presented two parameters - the noise schedule  $\sigma_t$  and the scaling  $\alpha_t$  - for which the effects on  
415 DPMs have been widely studied in [12].

416 As the shape of the trajectories of (1) and (2) (for  $\ell = 0, 1$ ) are defined by  $\alpha_t$  and  $\sigma_t$ , we start by  
417 writing down, for the scaling  $\mathbf{x}_t = \alpha_t \hat{\mathbf{x}}_t$ , the scaled generalization of the proposed SDEs in [12, Eq.  
418 103] which unifies in a single framework the forward and reverse trajectories:

$$d\mathbf{x}_t^\pm = \left[ \frac{\dot{\alpha}_t}{\alpha_t} \mathbf{x}_t^\pm - \alpha_t^2 \dot{\sigma}_t \sigma_t \nabla_{\mathbf{x}_t^\pm} \log p(\hat{\mathbf{x}}_t^\pm; \sigma_t) \pm \alpha_t^2 \dot{\sigma}_t \sigma_t \nabla_{\mathbf{x}_t^\pm} \log p(\hat{\mathbf{x}}_t^\pm; \sigma_t) \right] dt + \alpha_t \sigma_t \sqrt{2 \frac{\dot{\sigma}_t}{\sigma_t}} d\omega_t^\pm. \quad (17)$$

419 Following [12], the previous VP, VE, iDDPM, DDIM and EDM frameworks all are unified as different  
420 choices of  $\alpha_t$ ,  $\sigma_t$ , among other choices presented in [12, Tab. 1] and we will use this as a basis for all  
421 the proofs contained in this Appendix. In particular, forward time means taking  $\mathbf{x}_t^+$  for which the  
422 score vanishes in this context. Now set  $\mathbf{x}_t = \mathbf{x}_t^-$ .

423 The formulation in (2) involves a family of backwards differential equations controlled by a parameter  
424  $\ell \in [0, 1]$  which all yield reverse-time processes for (1), a fact that can be obtained by studying the  
425 Fokker-Planck equation for marginals  $p(\hat{\mathbf{x}}_t^+; \sigma_t)$  of (17).

426 When  $\ell = 1$ , (2) the obtained SDE is known as the reverse SDE (RSDE) and, when  $\ell = 0$ , we obtain  
427 an ODE that is known as the Probability Flow ODE (PFO):

$$d\mathbf{x}_t = \left[ \frac{\dot{\alpha}_t}{\alpha_t} \mathbf{x}_t - \alpha_t^2 \dot{\sigma}_t \sigma_t \nabla_{\mathbf{x}_t} \log p(\hat{\mathbf{x}}_t; \sigma_t) \right] dt. \quad (18)$$

Now, finding a minimum for the loss function in [12] Eq. 51] is formulated as a convex optimization problem. As such, for the ideal model  $D(\mathbf{x}_t; \sigma_t) = \arg \min_D \mathcal{L}(D; \mathbf{x}_t, \sigma_t)$ , the score function with scaled input is expressed as

$$\nabla_{\mathbf{x}_t} \log p(\widehat{\mathbf{x}}_t; \sigma_t) = \frac{D(\widehat{\mathbf{x}}_t; \sigma_t) - \widehat{\mathbf{x}}_t}{\alpha_t \sigma_t^2}.$$

This ideal model is usually subtracted by a *raw* network  $F$  in the form of a time-dependent preconditioning:

$$D(\mathbf{x}_t; \sigma_t) := c_1(t)\mathbf{x}_t + c_2(t)F(c_3(t)\mathbf{x}_t; c_4(t)), \quad c_i(t) \in \mathbb{R}^d, \quad i = 1, \dots, 4.$$

As such, we can express the score function as two parameterizations involving  $D$  or  $F$  as follows:

$$\nabla_{\mathbf{x}_t} \log p(\widehat{\mathbf{x}}_t; \sigma_t) = \frac{D(\widehat{\mathbf{x}}_t; \sigma_t) - \widehat{\mathbf{x}}_t}{\alpha_t \sigma_t^2} = \frac{(c_1(t) - 1)\widehat{\mathbf{x}}_t + c_2(t)F(c_3(t)\widehat{\mathbf{x}}_t; c_4(t))}{\alpha_t \sigma_t^2}. \quad (19)$$

Let us now denote  $D_{\theta,t}^1 := D_\theta(\widehat{\mathbf{x}}_t; \sigma_t)$  for a pre-trained network approximating the ideal denoiser and let  $D_{\theta,t}^2 := F_\theta(c_3(t)\widehat{\mathbf{x}}_t; c_4(t))$  be the corresponding raw pre-trained network. Substituting the score function in the RSDE and the PFO with each of these models yields four *different* differential equations with a neural network as one of their components. These are given, for  $i = 1, 2$ , by

$$d\mathbf{x}_t = [A^i(t)\mathbf{x}_t + B^i(t)D_{\theta,t}^i]dt + g(t)d\bar{\omega}_t, \quad (20)$$

$$d\mathbf{x}_t = [A^{i+2}(t)\mathbf{x}_t + B^{i+2}(t)D_{\theta,t}^i]dt. \quad (21)$$

When  $D_{\theta,t}^1$  (resp.  $D_{\theta,t}^2$ ) is employed to replace the score function in (17) using (19), the resulting SDE (20) will be called *data (resp. noise) prediction neural SDE*. Proceeding analogously for the PFO (18) yield two ODEs (21) which will be called *data (resp. noise) prediction neural PFO*. The general form of the  $A^i$  and  $B^i$  coefficients determining each of these DEs is as follows:

$$\begin{aligned} A^1(t) &= \frac{\dot{\alpha}_t}{\alpha_t} + 2\frac{\dot{\sigma}_t}{\sigma_t} & B^1(t) &= -2\alpha_t \frac{\dot{\sigma}_t}{\sigma_t} & \text{(DP NRSDE)} \\ A^2(t) &= \frac{\dot{\alpha}_t}{\alpha_t} + 2\frac{\dot{\sigma}_t}{\sigma_t}(1 - c_1(t)) & B^2(t) &= -2\alpha_t \frac{\dot{\sigma}_t}{\sigma_t}c_2(t) & \text{(NP NRSDE)} \\ A^3(t) &= \frac{\dot{\alpha}_t}{\alpha_t} + \frac{\dot{\sigma}_t}{\sigma_t} & B^3(t) &= -\alpha_t \frac{\dot{\sigma}_t}{\sigma_t} & \text{(DP NPFO)} \\ A^4(t) &= \frac{\dot{\alpha}_t}{\alpha_t} + \frac{\dot{\sigma}_t}{\sigma_t}(1 - c_1(t)) & B^4(t) &= -\alpha_t \frac{\dot{\sigma}_t}{\sigma_t}c_2(t) & \text{(NP NPFO)} \end{aligned}$$

*Remark A.1.* At first glance, it would seem misleading to differentiate four DEs as these essentially correspond to different choices of  $\alpha_t, \sigma_t, c_1(t), \dots, c_4(t)$ . But the reason why we do so is that, after applying the *variation of constants* formula, each of these DEs will yield a different representation of their exact solutions (see (22) and (23) below). As we will see below, constructing exponential integrators heavily depends on such representation and will show to lead to four different modes of SEEDS solvers, each one showing different behavior and performance for sampling from pre-trained DPMs. As such, we will articulate this difference already at the DE formulation.

For  $t < s$ , the variation of constants formulae for NSDEs allows to represent the exact solutions of (20) as

$$\mathbf{x}_t = \Phi^i(t, s)\mathbf{x}_s + \int_s^t \Phi^i(t, \tau)B^i(\tau)D_{\theta,\tau}^i d\tau + \int_s^t \Phi^i(t, \tau)g(\tau)d\bar{\omega}_\tau, \quad i = 1, 2 \quad (22)$$

and those for NPFOs (21) as

$$\mathbf{x}_t = \Phi^i(t, s)\mathbf{x}_s + \int_s^t \Phi^i(t, \tau)B^i(\tau)D_{\theta,\tau}^{i-2} d\tau, \quad i = 3, 4 \quad (23)$$

where

$$\Phi_{A^i}(t, s) = \exp\left(\int_s^t A^i(\tau)d\tau\right) \quad (24)$$

454 is called the transition matrix associated with  $A^i(t)$  and is defined as the solution to

$$\frac{\partial}{\partial t} \Phi_{A^i}(t, s) = A^i(t) \Phi_{A^i}(t, s), \quad \Phi_{A^i}(s, s) = \mathbf{I}_d.$$

455 When  $A^i(t)$  is constant and  $B^i(t) = 1$ , there is a well-established literature on exponential ODE  
 456 and SDE solvers with explicit *stiff order conditions* and prescribed by different forms of Butcher  
 457 tableaux. When  $A^i(t)$  is not constant, for the expression in (24) to make sense in the usual sense (in  
 458 terms of exponential series expansion) instead of having to make use of time-ordered exponentials/  
 459 Magnus expansions, the  $f(t) := A^i(t)$  coefficients must satisfy  $[f^{(k)}(t), f^{(l)}(s)] = 0$ . This condition  
 460 is trivially satisfied here as the  $A^i(t)$  considered here are  $d$ -dimensional diagonal matrices.

461 Notice that, if  $A^i \neq A^j$  for some  $i \neq j$ , their associated transition matrices will not be equal. In  
 462 particular, if  $A^1 \neq A^2$ , then the variances of the stochastic integrals in (22) are different for  $i = 1$   
 463 and  $i = 2$ . This is the first step in explaining the statement in Rem. A.1 and we refer the reader to  
 464 the proof of Proposition 4.4 where we put into evidence its validity.

## 465 A.2 Re-framing and Generalizing Previous Exponential Solvers

### 466 A.2.1 The VP case

467 Let  $\tilde{\alpha}_t := \int_0^t (\beta_d \tau - \beta_m) d\tau = \frac{1}{2} \beta_d t^2 + \beta_m t$ , where  $\beta_d > \beta_m > 0$ . Set

$$f(t) := \frac{d \log \alpha_t}{dt}, \quad g(t) = \alpha_t \sqrt{\frac{d[\sigma_t^2]}{dt}}, \quad \sigma_t = \sqrt{e^{\tilde{\alpha}_t} - 1}, \quad \alpha_t = e^{-\frac{1}{2} \tilde{\alpha}_t} = \frac{1}{\sqrt{\sigma_t^2 + 1}}.$$

468 Recall that in the VP case, and the *noise prediction mode*, [15] construct exponential solvers on the  
 469 base of the following ODE

$$d\mathbf{x}_t = \left[ f(t) \mathbf{x}_t + \frac{g^2(t)}{2\bar{\sigma}_t} \epsilon_\theta(\mathbf{x}_t; t) \right] dt, \quad t \in [T, 0], \quad (25)$$

470 where  $\bar{\sigma}_t := \alpha_t \sigma_t$ . The ODE (25) identifies with that in [12] for the VP case for which the authors  
 471 identify the preconditioning

$$c_1(t) = 1, \quad c_2(t) = -\sigma_t, \quad c_3(t) = \frac{1}{\sqrt{\sigma_t^2 + 1}}, \quad c_4(t) = (M-1)\sigma^{-1}(\sigma_t) = (M-1)t.$$

472 As such, we obtain the following coefficients for the NP NPFO:

$$A^4(t) = \frac{\dot{\alpha}_t}{\alpha_t}, \quad B^4(t) = \alpha_t \dot{\sigma}_t, \quad \Phi^4(t, s) = \frac{\alpha_t}{\alpha_s}$$

473 and

$$\begin{aligned} \nabla_{\mathbf{x}_t} \log p(\hat{\mathbf{x}}_t; \sigma_t) &= \frac{D_\theta(\hat{\mathbf{x}}_t; \sigma_t) - \hat{\mathbf{x}}_t}{\alpha_t \sigma_t^2} = \frac{(c_1(t) - 1)\hat{\mathbf{x}}_t + c_2(t)F(c_3(t)\hat{\mathbf{x}}_t; c_4(t))}{\alpha_t \sigma_t^2} \\ &= \frac{-\sigma_t F_\theta(\mathbf{x}_t, (M-1)t)}{\alpha_t \sigma_t^2}. \end{aligned}$$

### 474 A.2.2 Proof of Proposition 3.1

475 First of all, denote  $F_\theta(\mathbf{x}_t, (M-1)t) = \epsilon_\theta(\mathbf{x}_t, t)$ . We have

$$f(t) = \frac{d \log \alpha_t}{dt}, \quad g^2(t) = 2\bar{\sigma}_t^2 \left( \frac{d \log \bar{\sigma}_t}{dt} - \frac{d \log \alpha_t}{dt} \right) = -2\bar{\sigma}_t^2 \frac{d\lambda_t}{dt}, \quad \bar{\sigma}_t = e^{-\lambda_t}.$$

476 This way, one can directly relate  $\lambda_t$  with the *signal-to-noise ratio*  $\text{SNR}(t) = \alpha_t^2 / \bar{\sigma}_t^2$ , also being used  
 477 in [15]. As such,  $\text{SNR}(t)$  is strictly monotonically decreasing in time. Thus, the analytic solution to



478 (2) yields

$$\begin{aligned}
\mathbf{x}_t &= e^{\int_s^t f(\tau) d\tau} \mathbf{x}_s + \int_s^t \left( e^{\int_s^r f(\tau) d\tau} \frac{g^2(\tau)}{\bar{\sigma}_\tau} \boldsymbol{\epsilon}_\theta(\mathbf{x}_\tau, \tau) \right) d\tau + \int_s^t \left( e^{\int_s^r f(\tau) d\tau} g(\tau) \right) d\bar{\omega}(\tau) \\
&= \frac{\alpha_t}{\alpha_s} \mathbf{x}_s + \alpha_t \int_s^t \frac{g^2(\tau)}{\alpha_\tau \bar{\sigma}_\tau} \boldsymbol{\epsilon}_\theta(\mathbf{x}_\tau, \tau) d\tau + \alpha_t \int_s^t \frac{g(\tau)}{\alpha_\tau} d\bar{\omega}(\tau) \\
&= \frac{\alpha_t}{\alpha_s} \mathbf{x}_s - \alpha_t \int_s^t \frac{2\sigma_\tau^2}{\alpha_\tau \bar{\sigma}_\tau} \frac{d\lambda_\tau}{d\tau} \boldsymbol{\epsilon}_\theta(\mathbf{x}_\tau, \tau) d\tau + \alpha_t \int_s^t \frac{g(\tau)}{\alpha_\tau} d\bar{\omega}(\tau) \\
&= \frac{\alpha_t}{\alpha_s} \mathbf{x}_s - 2\alpha_t \int_s^t \frac{\bar{\sigma}_\tau}{\alpha_\tau} \frac{d\lambda_\tau}{d\tau} \boldsymbol{\epsilon}_\theta(\mathbf{x}_\tau, \tau) d\tau + \alpha_t \int_s^t \frac{g(\tau)}{\alpha_\tau} d\bar{\omega}(\tau) \\
&= \frac{\alpha_t}{\alpha_s} \mathbf{x}_s - 2\alpha_t \int_s^t e^{-\lambda_\tau} \frac{d\lambda_\tau}{d\tau} \boldsymbol{\epsilon}_\theta(\mathbf{x}_\tau, \tau) d\tau - \sqrt{2}\alpha_t \int_s^t e^{-\lambda_\tau} \sqrt{\frac{d\lambda_\tau}{d\tau}} d\bar{\omega}(\tau).
\end{aligned}$$

479 By using the change of variables to  $\lambda(t)$ , our equation now reads

$$\mathbf{x}_t = \frac{\alpha_t}{\alpha_s} \mathbf{x}_s - 2\alpha_t \int_{\lambda_s}^{\lambda_t} e^{-\lambda} \hat{\boldsymbol{\epsilon}}_\theta(\hat{\mathbf{x}}_\lambda, \lambda) d\lambda - \sqrt{2}\alpha_t \int_{\lambda_s}^{\lambda_t} e^{-\lambda} d\bar{\omega}(\lambda) \quad (26)$$

480 Finally, notice that  $\alpha_t = \sqrt{\frac{1}{1+e^{-2\lambda_t}}}$  and  $\bar{\sigma}_t = \sqrt{\frac{1}{1+e^{2\lambda_t}}}$  so that (26) is equivalent to

$$\hat{\mathbf{x}}_{\lambda_t} = \frac{\hat{\alpha}_{\lambda_t}}{\hat{\alpha}_{\lambda_s}} \hat{\mathbf{x}}_{\lambda_s} - 2\hat{\alpha}_{\lambda_t} \int_{\lambda_s}^{\lambda_t} e^{-\lambda} \hat{\boldsymbol{\epsilon}}_\theta(\hat{\mathbf{x}}_\lambda, \lambda) d\lambda - \sqrt{2}\hat{\alpha}_{\lambda_t} \int_{\lambda_s}^{\lambda_t} e^{-\lambda} d\bar{\omega}(\lambda).$$

481 This finishes the proof.

### 482 A.2.3 Proof of Proposition 4.2

483 Recall that the functions  $\varphi_k$  are the integrals

$$\varphi_{k+1}(t) = \int_0^1 e^{(1-\delta)t} \frac{\delta^k}{k!} d\delta,$$

484 which satisfy  $\varphi_k(0) = \frac{1}{k!}$ . The truncated Itô-Taylor expansion of  $\hat{\boldsymbol{\epsilon}}_\theta$  with respect to  $\lambda$  reads

$$\hat{\boldsymbol{\epsilon}}_\theta(\hat{\mathbf{x}}_\lambda, \lambda) = \sum_{k=0}^n \frac{(\lambda - \lambda_s)^k}{k!} \hat{\boldsymbol{\epsilon}}_\theta^{(k)}(\hat{\mathbf{x}}_{\lambda_s}, \lambda_s) + \mathcal{R}_{n+1}.$$

485 where here  $\hat{\boldsymbol{\epsilon}}_\theta^{(k)}$  denotes the  $L_t^k$  operators defined in (58) applied to  $\hat{\boldsymbol{\epsilon}}_\theta$ . On the one hand, since

486  $\int_{\lambda_s}^{\lambda_t} e^{-\lambda} d\lambda = \frac{\bar{\sigma}_t}{\alpha_t} (e^h - 1)$ , we obtain by iteratively integrating by parts

$$\begin{aligned}
\int_{\lambda_s}^{\lambda_t} e^{-\lambda} \hat{\boldsymbol{\epsilon}}_\theta(\hat{\mathbf{x}}_\lambda, \lambda) d\lambda &= \sum_{k=0}^n \hat{\boldsymbol{\epsilon}}_\theta^{(k)}(\hat{\mathbf{x}}_{\lambda_s}, \lambda_s) \int_{\lambda_s}^{\lambda_t} e^{-\lambda} \frac{(\lambda - \lambda_s)^k}{k!} d\lambda + \mathcal{R}_{n+2} \\
&= \frac{\bar{\sigma}_t}{\alpha_t} \sum_{k=0}^n \hat{\boldsymbol{\epsilon}}_\theta^{(k)}(\hat{\mathbf{x}}_{\lambda_s}, \lambda_s) h^{k+1} \varphi_{k+1}(h) + \mathcal{R}_{n+2}.
\end{aligned}$$

487 On the other hand, we have  $s > t, h = \lambda_t - \lambda_s > 0$ . Note that since the stochastic integrals  
488  $\int_{\lambda_s}^{\lambda_t} e^{-\lambda} d\bar{\omega}(\lambda)$  are measurable with respect to  $(\bar{\omega}(\lambda) - \bar{\omega}(\lambda_s), 0 \leq \lambda \leq \lambda_t - \lambda_s)$ , they are independent  
489 on disjoint time intervals by the independence of increments property of Brownian motion. Thus the  
490 random variable  $\epsilon := \epsilon_{s,t}$  in our algorithms are independent on disjoint time intervals. We then write

$$\begin{aligned}
\int_{\lambda_s}^{\lambda_t} e^{-\lambda} d\bar{\omega}(\lambda) &= \mathcal{N}\left(0, \int_{\lambda_s}^{\lambda_t} e^{-2\lambda} d\lambda\right) \\
&= \frac{1}{\sqrt{2}} \sqrt{e^{-2\lambda_s} - e^{-2\lambda_t}} \epsilon, \quad \epsilon \sim \mathcal{N}(\mathbf{0}, \mathbf{I}_d) \\
&= \frac{1}{\sqrt{2}} \sqrt{\left(\frac{\bar{\sigma}_s}{\alpha_s} - \frac{\bar{\sigma}_t}{\alpha_t}\right) \left(\frac{\bar{\sigma}_s}{\alpha_s} + \frac{\bar{\sigma}_t}{\alpha_t}\right)} \epsilon, \quad \epsilon \sim \mathcal{N}(\mathbf{0}, \mathbf{I}_d) \\
&= \frac{1}{\sqrt{2}} \frac{\bar{\sigma}_t}{\alpha_t} \sqrt{e^{2h} - 1} \epsilon, \quad \epsilon \sim \mathcal{N}(\mathbf{0}, \mathbf{I}_d).
\end{aligned}$$

491 In conclusion, the truncated Itô-Taylor expansion of the analytic expression

$$\mathbf{x}_t = \frac{\alpha_t}{\alpha_s} \mathbf{x}_s - 2\alpha_t \int_{\lambda_s}^{\lambda_t} e^{-\lambda} \widehat{\epsilon}_\theta(\widehat{\mathbf{x}}_\lambda, \lambda) d\lambda - \sqrt{2}\alpha_t \int_{\lambda_s}^{\lambda_t} e^{-\lambda} d\widehat{\omega}(\lambda) \quad (27)$$

492 simplifies to

$$\mathbf{x}_t = \frac{\alpha_t}{\alpha_s} \mathbf{x}_s - 2\bar{\sigma}_t \sum_{k=0}^n h^{k+1} \varphi_{k+1}(h) \widehat{\epsilon}_\theta^{(k)}(\widehat{\mathbf{x}}_{\lambda_s}, \lambda_s) - \bar{\sigma}_t \sqrt{e^{2h} - 1} \epsilon + \mathcal{R}_{n+2}, \quad \epsilon \sim \mathcal{N}(\mathbf{0}, \mathbf{I}_d).$$

493 This finishes the proof.

#### 494 A.2.4 Generalization to the remaining data prediction and deterministic modes

495 Propositions 3.1 and 4.2 consist on the first steps for crafting SEEDS solvers in the VP case associated  
496 to the noise prediction neural RSDE (NP NRSDE). Generalizing the above procedure for crafting  
497 SEEDS for the 4 modes associated to (22) and (23) yields the following sets of coefficients

$$\begin{aligned} A^1(t) &= \frac{\dot{\alpha}_t}{\alpha_t} + 2 \frac{\dot{\sigma}_t}{\sigma_t} & B^1(t) &= -2\alpha_t \frac{\dot{\sigma}_t}{\sigma_t} & (\text{DP NRSDE}) \\ A^2(t) &= \frac{\dot{\alpha}_t}{\alpha_t} & B^2(t) &= 2\alpha_t \dot{\sigma}_t & (\text{NP NRSDE}) \\ A^3(t) &= \frac{\dot{\alpha}_t}{\alpha_t} + \frac{\dot{\sigma}_t}{\sigma_t} & B^3(t) &= -\alpha_t \frac{\dot{\sigma}_t}{\sigma_t} & (\text{DP NPFO}) \\ A^4(t) &= \frac{\dot{\alpha}_t}{\alpha_t} & B^4(t) &= \alpha_t \dot{\sigma}_t & (\text{NP NPFO}) \end{aligned}$$

498 We readily obtain

$$\Phi^2(t, s) = \Phi^4(t, s) = \frac{\alpha_t}{\alpha_s}, \quad \Phi^3(t, s) = \frac{\bar{\sigma}_t}{\bar{\sigma}_s}, \quad \Phi^1(t, s) = \frac{\sigma_t^2 \alpha_t}{\sigma_s^2 \alpha_s}.$$

499 Then, by setting the simpler change of variables  $\lambda_t := -\log(\sigma_t)$ , we obtain

$$\int_s^t \Phi^4(t, \tau) B^4(\tau) d\tau = \alpha_t \int_s^t \frac{1}{\alpha_\tau} \alpha_\tau \dot{\sigma}_\tau d\tau = \alpha_t \int_s^t \dot{\sigma}_\tau d\tau = -\alpha_t \int_{\lambda_s}^{\lambda_t} e^{-\lambda} d\lambda = -\bar{\sigma}_t (e^h - 1).$$

500 By recursion we obtain

$$\int_s^t \Phi^4(t, \tau) B^4(\tau) F_{\theta, \tau} d\tau = -\bar{\sigma}_t \sum_{k=0}^{n-1} h^{k+1} \varphi_{k+1}(h) F_{\theta, s}^{(k)} + \mathcal{O}(h^{n+1}).$$

501 In the same way, we obtain

$$\begin{aligned} \int_s^t \Phi^3(t, \tau) B^3(\tau) d\tau &= \sigma_t \alpha_t \int_s^t \frac{-1}{\alpha_\tau \sigma_\tau} \alpha_\tau \frac{\dot{\sigma}_\tau}{\sigma_\tau} d\tau = \sigma_t \alpha_t \int_s^t \frac{-\dot{\sigma}_\tau}{\sigma_\tau^2} d\tau \\ &= \sigma_t \alpha_t \int_{\lambda_s}^{\lambda_t} e^\lambda d\lambda = -\alpha_t (e^{-h} - 1). \end{aligned}$$

502 Next,

$$\int_s^t \Phi^2(t, \tau) B^2(\tau) d\tau = \alpha_t \int_s^t \frac{2}{\alpha_\tau} \alpha_\tau \dot{\sigma}_\tau d\tau = -2\bar{\sigma}_t (e^h - 1),$$

503 and finally, as already shown in Propositions 3.1 and 4.2:

$$\begin{aligned} \int_s^t \Phi^1(t, \tau) B^1(\tau) d\tau &= \sigma_t^2 \alpha_t \int_s^t \frac{-2\dot{\sigma}_\tau}{\sigma_\tau^3} d\tau = \sigma_t^2 \alpha_t \int_s^t -2 \frac{d\lambda_\tau}{d\tau} e^{2\lambda_\tau} d\tau \\ &= \sigma_t^2 \alpha_t \int_{\lambda_s}^{\lambda_t} e^{2\lambda} d\lambda = -\alpha_t (e^{-2h} - 1). \end{aligned}$$

Now, since  $g^2(t) = 2\alpha_t^2\dot{\sigma}_t\sigma_t$ , the stochastic integrals  $\int_s^t \Phi^i(t, \tau)g(\tau)d\bar{\omega}_\tau$ , for  $i = 1, 2$ , have zero mean and variances:

$$\begin{aligned}\int_s^t (\Phi^1(t, \tau))^2 g^2(\tau) d\tau &= \sigma_t^4 \alpha_t^2 \int_s^t \frac{1}{\sigma_\tau^4 \alpha_\tau^2} g^2(\tau) d\tau = \bar{\sigma}_t^2 (1 - e^{-2h}) \\ \int_s^t (\Phi^2(t, \tau))^2 g^2(\tau) d\tau &= \alpha_t^2 \int_s^t 2\dot{\sigma}_\tau \sigma_\tau d\tau = -\bar{\sigma}_t^2 (e^{2h} - 1).\end{aligned}$$

We deduce from this the SEEDS-1 schemes in all four modes as given by iterates:

$$\tilde{\mathbf{x}}_t = \frac{\sigma_t^2 \alpha_t}{\sigma_s^2 \alpha_s} \tilde{\mathbf{x}}_s - \alpha_t (e^{-2h} - 1) D_\theta(\tilde{\mathbf{x}}_s, s) + \bar{\sigma}_t \sqrt{1 - e^{-2h}} \epsilon \quad \epsilon \sim \mathcal{N}(\mathbf{0}, \mathbf{I}_d) \quad (28)$$

$$\tilde{\mathbf{x}}_t = \frac{\alpha_t}{\alpha_s} \tilde{\mathbf{x}}_s - 2\bar{\sigma}_t (e^h - 1) \epsilon_\theta(\tilde{\mathbf{x}}_s, s) - \bar{\sigma}_t \sqrt{e^{2h} - 1} \epsilon \quad \epsilon \sim \mathcal{N}(\mathbf{0}, \mathbf{I}_d) \quad (29)$$

$$\tilde{\mathbf{x}}_t = \frac{\bar{\sigma}_t}{\bar{\sigma}_s} \tilde{\mathbf{x}}_s - \alpha_t (e^{-h} - 1) D_\theta(\tilde{\mathbf{x}}_s, s) \quad (30)$$

$$\tilde{\mathbf{x}}_t = \frac{\alpha_t}{\alpha_s} \tilde{\mathbf{x}}_s - \bar{\sigma}_t (e^h - 1) \epsilon_\theta(\tilde{\mathbf{x}}_s, s). \quad (31)$$

Notice that the iterates (30) and (31) are exactly the iterates of the first stage solvers in [15] and [16] with  $F_\theta(\mathbf{x}_t; (M-1)t) = \epsilon_\theta(\mathbf{x}_t, t)$ . The iterates (29) coincide with the SEEDS-1 method presented in [14] and (28) consist on our SEEDS-1 method in the *data prediction mode*, which we will use in the following section.

#### A.2.5 Proof of Proposition 4.4

We will write in **bold** the statement to be proven.

**If we set  $g = 0$  in (15), the resulting SEEDS solvers do not yield DPM-Solver.** Indeed, if we set  $g = 0$  in (15), then the method (29) does not contain a noise contribution and we readily see that it cannot be equal to (31). As the latter has been shown to be DPM-Solver-1, the conclusion follows.

**If we parameterize (15) in terms of the data prediction model  $D_\theta$ , the resulting SEEDS solvers are not equivalent to their noise prediction counterparts defined in Alg. 1 to 4.**

One can check that the SEEDS solver are not the same between the noise and data prediction modes by simply noticing that the noise contributions in (28) and (29) do not equate.

**The gDDIM solver [27] Theorem 1, for  $\ell = 1$ , is equal to SEEDS-1 in the data prediction mode.**

As shown in (29), our proposed method SEEDS-1 in the data prediction mode for the VP case has iterates of the form

$$\tilde{\mathbf{x}}_t = \frac{\sigma_t^2 \alpha_t}{\sigma_s^2 \alpha_s} \tilde{\mathbf{x}}_s - \alpha_t (e^{-2h} - 1) D_\theta(\tilde{\mathbf{x}}_s, s) + \bar{\sigma}_t \sqrt{1 - e^{-2h}} \epsilon, \quad (32)$$

where  $\epsilon \sim \mathcal{N}(\mathbf{0}, \mathbf{I}_d)$ ,  $\bar{\sigma}_t = \alpha_t \sigma_t$  and  $h = \log \frac{\sigma_s}{\sigma_t}$ . As our notation and that of [27] Theorem 1] overlap, we will use **blue color** when referring to their notation.

On the one hand, gDDIM constructs iterates over a representation of the exact solution of the following family of neural differential equations:

$$d\mathbf{u}_t = \left[ f(t)\mathbf{u}_t + \frac{1 + \lambda^2}{2} \frac{g^2(t)}{\sqrt{1 - \alpha_t}} \epsilon_\theta(\mathbf{u}_t; t) \right] dt + \lambda g(t) d\bar{\omega}_t \quad (33)$$

where  $\alpha_t$  decreases from  $\alpha_0 = 1$  to  $\alpha_T = 0$ , and coefficients

$$f(t) := \frac{1}{2} \frac{d \log \alpha_t}{dt}, \quad g(t) = \sqrt{-\frac{d \log \alpha_t}{dt}}$$

In particular, they choose an approximation, for  $\tau \in [t - \Delta t, t]$ , given by

$$s_\theta(\mathbf{u}, \tau) = \frac{\epsilon_\theta(\mathbf{u}_\tau, \tau)}{\sqrt{1 - \alpha_t}} \approx \frac{1 - \alpha_t}{1 - \alpha_\tau} \sqrt{\frac{\alpha_\tau}{\alpha_t}} s_\theta(\mathbf{u}(t), t) - \frac{1}{1 - \alpha_\tau} (\mathbf{u} - \sqrt{\frac{\alpha_\tau}{\alpha_t}} \mathbf{u}(t)).$$

529 The gDDIM iterates, for  $\lambda = 1 = \ell$ , are then written as follows:

$$\mathbf{u}(t - \Delta t) = \sqrt{\frac{\alpha_{t-\Delta t}}{\alpha_t}} \mathbf{u}(t) + \left[ -\sqrt{\frac{\alpha_{t-\Delta t}}{\alpha_t}} \sqrt{1 - \alpha_t} + \sqrt{1 - \alpha_{t-\Delta t} - \sigma_t^2} \right] \epsilon_\theta(\mathbf{u}(t), t) + \sigma_t \epsilon \quad (34)$$

530 where  $\epsilon \sim \mathcal{N}(\mathbf{0}, \mathbf{I}_d)$  and where

$$\sigma_t^2 = (1 - \alpha_{t-\Delta t}) \left[ 1 - \left( \frac{1 - \alpha_{t-\Delta t}}{1 - \alpha_t} \right) \left( \frac{\alpha_t}{\alpha_{t-\Delta t}} \right) \right]. \quad (35)$$

531 Now set  $(s, t) \leftarrow (t, t - \Delta t)$ . Then

$$\begin{aligned} \sigma_s^2 &= (1 - \alpha_t) \left[ 1 - \left( \frac{1 - \alpha_t}{1 - \alpha_s} \right) \left( \frac{\alpha_s}{\alpha_t} \right) \right], \\ \mathbf{u}(t) &= \sqrt{\frac{\alpha_t}{\alpha_s}} \mathbf{u}(s) + \left[ \sqrt{1 - \alpha_t - \sigma_s^2} - \sqrt{\frac{\alpha_t}{\alpha_s}} \sqrt{1 - \alpha_s} \right] \epsilon_\theta(\mathbf{u}(s), s) + \sigma_s \epsilon. \end{aligned}$$

532 Now set  $\alpha_t = \sqrt{\alpha_t}$ , and  $\bar{\sigma}_t = \sqrt{1 - \alpha_t}$ . Then the variance of the noise in (35) is

$$\begin{aligned} \sigma_s^2 &= \bar{\sigma}_t^2 \left[ 1 - \left( \frac{\bar{\sigma}_t}{\bar{\sigma}_s} \right)^2 \left( \frac{\alpha_s}{\alpha_t} \right)^2 \right] = \bar{\sigma}_t^2 \left[ 1 - \left( \frac{\alpha_t \sigma_t}{\alpha_s \sigma_s} \right)^2 \left( \frac{\alpha_s}{\alpha_t} \right)^2 \right] \\ &= \bar{\sigma}_t^2 \left[ 1 - \left( \frac{\sigma_t}{\sigma_s} \right)^2 \right] \\ &= \bar{\sigma}_t^2 (1 - e^{-2h}). \end{aligned}$$

533 Hence, by denoting  $\tilde{\mathbf{x}}_t = \mathbf{u}(t)$ , the gDDIM iterate (34) reads, for  $\epsilon \sim \mathcal{N}(\mathbf{0}, \mathbf{I}_d)$ :

$$\begin{aligned} \tilde{\mathbf{x}}_t &= \frac{\alpha_t}{\alpha_s} \tilde{\mathbf{x}}_s + \left[ \sqrt{\bar{\sigma}_t^2 - \bar{\sigma}_t^2 (1 - e^{-2h})} - \frac{\alpha_t}{\alpha_s} \bar{\sigma}_s \right] \epsilon_\theta(\tilde{\mathbf{x}}_s, s) + \sqrt{\bar{\sigma}_t^2 (1 - e^{-2h})} \epsilon \\ &= \frac{\alpha_t}{\alpha_s} \tilde{\mathbf{x}}_s + \left[ \bar{\sigma}_t \sqrt{e^{-2h}} - \alpha_t \sigma_s \right] \epsilon_\theta(\tilde{\mathbf{x}}_s, s) + \bar{\sigma}_t \sqrt{1 - e^{-2h}} \epsilon \\ &= \frac{\alpha_t}{\alpha_s} \tilde{\mathbf{x}}_s + \bar{\sigma}_t \left[ \frac{\sigma_t}{\sigma_s} - \frac{\sigma_s}{\sigma_t} \right] \epsilon_\theta(\tilde{\mathbf{x}}_s, s) + \bar{\sigma}_t \sqrt{1 - e^{-2h}} \epsilon. \end{aligned} \quad (36)$$

534 On the other hand, the data and noise prediction models in our case are related by the following  
535 equation:

$$D_\theta(\tilde{\mathbf{x}}_s, s) = c_1(s) \frac{\tilde{\mathbf{x}}_s}{\alpha_s} + c_2(s) \epsilon_\theta(\tilde{\mathbf{x}}_s, s) = \frac{\tilde{\mathbf{x}}_s}{\alpha_s} - \sigma_s \epsilon_\theta(\tilde{\mathbf{x}}_s, s).$$

536 As such, and as  $h = \lambda_t - \lambda_s = \log \frac{\sigma_s}{\sigma_t}$ , one can rewrite (32) in terms of  $\epsilon_\theta$  as follows:

$$\begin{aligned} \tilde{\mathbf{x}}_t &= \frac{\sigma_t^2 \alpha_t}{\sigma_s^2 \alpha_s} \tilde{\mathbf{x}}_s - \alpha_t (e^{-2h} - 1) D_\theta(\tilde{\mathbf{x}}_s, s) + \bar{\sigma}_t \sqrt{1 - e^{-2h}} \epsilon \\ &= \frac{\sigma_t^2 \alpha_t}{\sigma_s^2 \alpha_s} \tilde{\mathbf{x}}_s - \alpha_t \left( \frac{\sigma_t^2}{\sigma_s^2} - 1 \right) \left[ \frac{\tilde{\mathbf{x}}_s}{\alpha_s} - \sigma_s \epsilon_\theta(\tilde{\mathbf{x}}_s, s) \right] + \bar{\sigma}_t \sqrt{1 - e^{-2h}} \epsilon \\ &= \left[ \frac{\sigma_t^2 \alpha_t}{\sigma_s^2 \alpha_s} - \frac{\alpha_t}{\alpha_s} \left( \frac{\sigma_t^2}{\sigma_s^2} - 1 \right) \right] \tilde{\mathbf{x}}_s + \alpha_t \left( \frac{\sigma_t^2}{\sigma_s^2} - 1 \right) \sigma_s \epsilon_\theta(\tilde{\mathbf{x}}_s, s) + \bar{\sigma}_t \sqrt{1 - e^{-2h}} \epsilon \\ &= \frac{\alpha_t}{\alpha_s} \tilde{\mathbf{x}}_s + \bar{\sigma}_t \left( \frac{\sigma_t^2}{\sigma_s^2} - 1 \right) \frac{\sigma_s}{\sigma_t} \epsilon_\theta(\tilde{\mathbf{x}}_s, s) + \bar{\sigma}_t \sqrt{1 - e^{-2h}} \epsilon \\ &= \frac{\alpha_t}{\alpha_s} \tilde{\mathbf{x}}_s + \bar{\sigma}_t \left( \frac{\sigma_t}{\sigma_s} - \frac{\sigma_s}{\sigma_t} \right) \epsilon_\theta(\tilde{\mathbf{x}}_s, s) + \bar{\sigma}_t \sqrt{1 - e^{-2h}} \epsilon, \end{aligned}$$

537 which coincides with the gDDIM iterate in Equation (36).

### 538 A.2.6 The VE, DDIM and iDDPM cases

539 Following [12 Eq. 217], here  $\alpha_t = 1$  and  $c_1(t) = 1$  and so the only possibilities incurring into  
 540 semi-linear differential equations are

$$A^1(t) = 2 \frac{\dot{\sigma}_t}{\sigma_t} \quad B^1(t) = -2 \frac{\dot{\sigma}_t}{\sigma_t} \quad (\text{DP SDE})$$

$$A^3(t) = \frac{\dot{\sigma}_t}{\sigma_t} \quad B^3(t) = -\frac{\dot{\sigma}_t}{\sigma_t}. \quad (\text{DP PFO})$$

541 We obtain, again with the choice  $\lambda_t = -\log(\sigma_t)$  and setting  $h = \lambda_t - \lambda_s$ , the following:

$$\Phi^1(t, s) = \frac{\sigma_t^2}{\sigma_s^2}, \quad \Phi^3(t, s) = \frac{\sigma_t}{\sigma_s},$$

542

$$\begin{aligned} \int_s^t \Phi^1(t, \tau) B^1(\tau) d\tau &= -\sigma_t^2 \int_{\lambda_s}^{\lambda_t} e^{2\lambda} d\lambda = \frac{1}{2} (e^{-2h} - 1) \\ \int_s^t \Phi^3(t, \tau) B^3(\tau) d\tau &= -\sigma_t \int_{\lambda_s}^{\lambda_t} e^{\lambda} d\lambda = e^{-h} - 1. \end{aligned}$$

543 Next,

$$\int_s^t (\Phi^1(t, \tau))^2 g^2(\tau) d\tau = \sigma_t^4 \int_s^t \frac{1}{\sigma_\tau^4} \sigma_\tau^2 2 \frac{\dot{\sigma}_\tau}{\sigma_\tau} d\tau = \sigma_t^4 \int_s^t \frac{2\dot{\sigma}_\tau}{\sigma_\tau^3} d\tau = \sigma_t^2 (e^{-2h} - 1).$$

544 We readily see that these cases are identical to the VP case with  $\alpha_t = 1$ . In particular, the obtained  
 545 SEEDS-1 iterates are

$$\begin{aligned} \tilde{\mathbf{x}}_t &= \frac{\sigma_t^2}{\sigma_s^2} \tilde{\mathbf{x}}_s - (e^{-2h} - 1) D_\theta(\tilde{\mathbf{x}}_s; \sigma_s) + \sigma_t \sqrt{1 - e^{-2h}} \epsilon, \\ \tilde{\mathbf{x}}_t &= \frac{\sigma_t}{\sigma_s} \tilde{\mathbf{x}}_s - (e^{-h} - 1) D_\theta(\tilde{\mathbf{x}}_s; \sigma_s) \end{aligned}$$

546 Now denote  $s_1 = t_\lambda(\lambda_s + rh)$ , for  $0 < r \leq 1$ , where  $t_\lambda = e^{-\lambda}$ . There are two families of single-step  
 547 one-parameter two-stage exponential ODE schemes:

$$\begin{aligned} \tilde{\mathbf{x}}_t &= \frac{\sigma_t}{\sigma_s} \tilde{\mathbf{x}}_s - (e^{-h} - 1) \left[ \left(1 - \frac{1}{2r}\right) D_\theta(\tilde{\mathbf{x}}_s; \sigma_s) + \frac{1}{2r} D_\theta(\tilde{\mathbf{x}}_1; \sigma_{s_1}) \right] \\ \tilde{\mathbf{x}}_t &= \frac{\sigma_t}{\sigma_s} \tilde{\mathbf{x}}_s - (e^{-h} - 1) D_\theta(\tilde{\mathbf{x}}_s; \sigma_s) + \frac{1}{r} \left( \frac{e^{-h} - 1}{h} + 1 \right) [D_\theta(\tilde{\mathbf{x}}_1; \sigma_{s_1}) - D_\theta(\tilde{\mathbf{x}}_s; \sigma_s)], \end{aligned}$$

548 with same supporting value

$$\tilde{\mathbf{x}}_1 = \frac{\sigma_{s_1}}{\sigma_s} \tilde{\mathbf{x}}_s - (e^{-rh} - 1) D_\theta(\tilde{\mathbf{x}}_s; \sigma_s).$$

549 In the same vein we define a single-step two stage exponential SDE scheme:

$$\begin{aligned} \tilde{\mathbf{x}}_1 &= \frac{\sigma_{s_1}^2}{\sigma_s^2} \tilde{\mathbf{x}}_s - (e^{-2rh} - 1) D_\theta(\tilde{\mathbf{x}}_s; \sigma_s) + \sigma_{s_1} \sqrt{e^{-2rh} - 1} \epsilon_1 \\ \tilde{\mathbf{x}}_t &= \frac{\sigma_t^2}{\sigma_s^2} \tilde{\mathbf{x}}_s - (e^{-2h} - 1) \left[ \left(1 - \frac{1}{2r}\right) D_\theta(\tilde{\mathbf{x}}_s; \sigma_s) + \frac{1}{2r} D_\theta(\tilde{\mathbf{x}}_1; \sigma_{s_1}) \right] \\ &\quad + \sigma_t \left[ \sqrt{e^{-2h} - e^{-2rh}} \epsilon_1 + \sqrt{e^{-2rh} - 1} \epsilon_2 \right]. \end{aligned}$$

### 550 A.2.7 The EDM case

551 In the EDM-preconditioned case [12 App. B.6], we set  $\sigma_t := t$  and  $\alpha_t := 1$ . We denote  $\sigma_d := \sigma_{\text{data}}$   
 552 the variance of the considered initial dataset and we set

$$c_1(t) = \frac{\sigma_d^2}{t^2 + \sigma_d^2}, \quad c_2(t) = \frac{t\sigma_d}{\sqrt{t^2 + \sigma_d^2}}, \quad c_3(t) = \frac{1}{\sqrt{t^2 + \sigma_d^2}}, \quad c_4(t) = \frac{1}{4} \log(t),$$

so we obtain the following coefficients:

$$\begin{aligned}
A^1(t) &= \frac{2}{t} & B^1(t) &= -\frac{2}{t} & (\text{DP NRSDE}) \\
A^2(t) &= \frac{2}{t} \left(1 - \frac{\sigma_d^2}{t^2 + \sigma_d^2}\right) & B^2(t) &= \frac{-2\sigma_d}{\sqrt{t^2 + \sigma_d^2}} & (\text{NP NRSDE}) \\
A^3(t) &= \frac{1}{t} & B^3(t) &= -\frac{1}{t} & (\text{DP NPFO}) \\
A^4(t) &= \frac{1}{t} \left(1 - \frac{\sigma_d^2}{t^2 + \sigma_d^2}\right) & B^4(t) &= \frac{-\sigma_d}{\sqrt{t^2 + \sigma_d^2}} & (\text{NP NPFO})
\end{aligned}$$

In particular, the data prediction neural SDE/PFO are identical to those in the VE case with  $\sigma_t = t$ . So let us concentrate on the noise prediction regime, leading us to prove Proposition 3.2

### A.2.8 Proof of Proposition 3.2

In the Noise Prediction case, we have

$$\Phi^2(t, s) = \frac{t^2 + \sigma_d^2}{s^2 + \sigma_d^2}, \quad \Phi^4(t, s) = \sqrt{\frac{t^2 + \sigma_d^2}{s^2 + \sigma_d^2}},$$

so we readily compute:

$$\begin{aligned}
\int_s^t \Phi^2(t, \tau) B^2(\tau) d\tau &= (t^2 + \sigma_d^2) \int_s^t \frac{1}{\tau^2 + \sigma_d^2} \cdot \frac{-2\sigma_d}{\sqrt{\tau^2 + \sigma_d^2}} d\tau, \\
\int_s^t \Phi^4(t, \tau) B^4(\tau) d\tau &= \sqrt{t^2 + \sigma_d^2} \int_s^t \frac{\sigma_d}{\sqrt{\tau^2 + \sigma_d^2}} \cdot \frac{-1}{\sqrt{\tau^2 + \sigma_d^2}} d\tau.
\end{aligned}$$

Let us consider two different changes of variables:

$$\lambda_t := -\log \left( \arctan \left( \frac{t}{\sigma_d} \right) \right) \quad \text{and} \quad \lambda_t := -\log \left( \frac{t}{\sigma_d \sqrt{t^2 + \sigma_d^2}} \right), \quad (37)$$

that will be used for the (NP NPFO) and (NP NRSDE), respectively. For the former case, we have

$$e^{-\lambda_t} d\lambda_t = -\frac{\frac{1}{\sigma_d} dt}{1 + \frac{t^2}{\sigma_d^2}} = -\frac{\sigma_d dt}{\sigma_d^2 + t^2}.$$

Therefore, we can deduce that

$$\begin{aligned}
\int_s^t \Phi^4(t; \tau) B^4(\tau) d\tau &= \int_s^t \sqrt{\frac{t^2 + \sigma_d^2}{\tau^2 + \sigma_d^2}} \cdot \frac{-\sigma_d}{\sqrt{\tau^2 + \sigma_d^2}} d\tau \\
&= \sqrt{t^2 + \sigma_d^2} \int_{\lambda_s}^{\lambda_t} \frac{-\sigma_d}{\tau^2 + \sigma_d^2} d\tau \\
&= \sqrt{t^2 + \sigma_d^2} \int_{\lambda_s}^{\lambda_t} e^{-\lambda} d\lambda \\
&= \sqrt{t^2 + \sigma_d^2} \arctan \left( \frac{t}{\sigma_d} \right) (e^h - 1).
\end{aligned}$$

For the latter case, we have

$$\begin{aligned}
e^{-\lambda_t} d\lambda_t &= -\frac{\sigma_d \sqrt{t^2 + \sigma_d^2} - t \sigma_d \frac{t}{\sqrt{t^2 + \sigma_d^2}}}{\sigma_d^2 (t^2 + \sigma_d^2)} \\
&= -\frac{\sigma_d^2}{\sigma_d (t^2 + \sigma_d^2) \sqrt{t^2 + \sigma_d^2}} = -\frac{\sigma_d}{(t^2 + \sigma_d^2) \sqrt{t^2 + \sigma_d^2}}.
\end{aligned}$$

563 We then obtain

$$\begin{aligned}
\int_s^t \Phi^2(t; \tau) B^2(\tau) d\tau &= \int_s^t \frac{t^2 + \sigma_d^2}{\tau^2 + \sigma_d^2} \cdot \frac{-2\sigma_d}{\sqrt{\tau^2 + \sigma_d^2}} d\tau \\
&= 2(t^2 + \sigma_d^2) \int_s^t e^{-\lambda} d\lambda \\
&= \frac{2t\sqrt{t^2 + \sigma_d^2}}{\sigma_d} (e^h - 1).
\end{aligned}$$

564 The stochastic integral  $\int_s^t \Phi^2(t; \tau) g(\tau) d\bar{\omega}_\tau$  in noise prediction case is a Gaussian random variable  
565 with zero mean and whose variance can be computed by Itô isometry as

$$\begin{aligned}
\int_t^s [\Phi^2(t; \tau) g^2(\tau)]^2 d\tau &= (t^2 + \sigma_d^2)^2 \int_t^s \frac{1}{[\tau^2 + \sigma_d^2]^2} 2\tau d\tau \\
&= (t^2 + \sigma_d^2)^2 \int_t^s \frac{1}{[\tau^2 + \sigma_d^2]^2} d\tau^2 \\
&= (t^2 + \sigma_d^2)^2 \left( -\frac{1}{s^2 + \sigma_d^2} + \frac{1}{t^2 + \sigma_d^2} \right) \\
&= \frac{(t^2 + \sigma_d^2)(s^2 - t^2)}{(s^2 + \sigma_d^2)}.
\end{aligned}$$

566 Putting everything together, we obtain the analytic solution at time  $t$  of (2) with coefficients (11) and  
567 initial value  $\mathbf{x}_s$  for the (NP NRSDE):

$$\mathbf{x}_t = \frac{t^2 + \sigma_d^2}{s^2 + \sigma_d^2} \mathbf{x}_s + 2(t^2 + \sigma_d^2) \int_{\lambda_s}^{\lambda_t} e^{-\lambda} \hat{F}_\theta(\hat{\mathbf{x}}_\lambda, \lambda) d\lambda - \sqrt{2}(t^2 + \sigma_d^2) \int_{\lambda_s}^{\lambda_t} e^{-\lambda} d\bar{\omega}_\lambda, \quad (38)$$

568 where  $\lambda_t := -\log \left[ \frac{t}{\sigma_d \sqrt{t^2 + \sigma_d^2}} \right]$ . For the (NP NPFO), it is given by

$$\mathbf{x}_t = \sqrt{\frac{t^2 + \sigma_d^2}{s^2 + \sigma_d^2}} \mathbf{x}_s + \sqrt{t^2 + \sigma_d^2} \int_{\lambda_s}^{\lambda_t} e^{-\lambda} \hat{F}_\theta(\hat{\mathbf{x}}_\lambda, \lambda) d\lambda, \quad \lambda_t := -\log \left[ \arctan \left[ \frac{t}{\sigma_d} \right] \right]. \quad (39)$$

569 This finishes the proof.

570

571 *Remark A.2.* From the above proof, we immediately deduce the SEEDS-1 iterates in the EDM-  
572 preconditioned noise prediction case. These are given, for the (NP NPFO) and (NP NRSDE)  
573 respectively, by

$$\tilde{\mathbf{x}}_t = \sqrt{\frac{t^2 + \sigma_d^2}{s^2 + \sigma_d^2}} \tilde{\mathbf{x}}_s + \sqrt{t^2 + \sigma_d^2} \arctan \left( \frac{t}{\sigma_d} \right) (e^h - 1) \epsilon_\theta(\tilde{\mathbf{x}}_s, s), \quad (40)$$

$$\tilde{\mathbf{x}}_t = \frac{t^2 + \sigma_d^2}{s^2 + \sigma_d^2} \tilde{\mathbf{x}}_s + \frac{2t\sqrt{t^2 + \sigma_d^2}}{\sigma_d} (e^h - 1) \epsilon_\theta(\tilde{\mathbf{x}}_s, s) + \sqrt{\frac{(t^2 + \sigma_d^2)(s^2 - t^2)}{(s^2 + \sigma_d^2)}} \epsilon, \quad (41)$$

574 where  $\epsilon \sim \mathcal{N}(\mathbf{0}, \mathbf{I}_d)$ .

575

## 576 B Convergence Proofs

577 In this Section, we give detailed proofs of Theorem 4.1 and Corollary 4.3 stated in the main part of  
578 this paper. Let us start recalling its framework. We start by considering the NP NRSDE (15) with VP

579 coefficients:

$$\begin{aligned}
d\mathbf{x}_t &= \left[ f(t)\mathbf{x}_t + \frac{g^2(t)}{\bar{\sigma}_t} \boldsymbol{\epsilon}_\theta(\mathbf{x}_t, t) \right] dt + g(t)d\bar{\omega}_t \\
&= \left[ f(t)\mathbf{x}_t + \frac{2\alpha_t^2 \dot{\sigma}_t \sigma_t}{\bar{\sigma}_t} \boldsymbol{\epsilon}_\theta(\mathbf{x}_t, t) \right] dt + g(t)d\bar{\omega}_t \\
&= \left[ \frac{d \log \alpha_t}{dt} \mathbf{x}_t + 2\alpha_t \dot{\sigma}_t \boldsymbol{\epsilon}_\theta(\mathbf{x}_t, t) \right] dt + \alpha_t \sqrt{\frac{d[\sigma_t^2]}{dt}} d\bar{\omega}_t
\end{aligned} \tag{42}$$

580 Denote  $t_\lambda$  the inverse of  $\lambda_t := -\log(\sigma_t)$  (which is a strictly decreasing function of  $t$ ) and denote  
581  $\hat{\mathbf{x}}_\lambda := \mathbf{x}(t_\lambda(\lambda))$ ,  $\hat{\boldsymbol{\epsilon}}_\theta(\hat{\mathbf{x}}_\lambda, \lambda) := \boldsymbol{\epsilon}_\theta(\mathbf{x}(t_\lambda(\lambda)), t_\lambda(\lambda))$ . We consider a time discretization  $\{t_i\}_{i=0}^{M+1}$   
582 going backwards in time starting from  $t_0 = T$  to  $t_{M+1} = 0$  and to ease the notation we will always  
583 denote  $t < s$  for two consecutive time-steps  $t_i < t_{i-1}$ . The analytic solution at time  $t$  of the RSDE  
584 (2) with coefficients (7) and initial value  $\mathbf{x}_s$  reads

$$\mathbf{x}_t = \frac{\alpha_t}{\alpha_s} \mathbf{x}_s - 2\alpha_t \int_{\lambda_s}^{\lambda_t} e^{-\lambda} \hat{\boldsymbol{\epsilon}}_\theta(\hat{\mathbf{x}}_\lambda, \lambda) d\lambda - \sqrt{2}\alpha_t \int_{\lambda_s}^{\lambda_t} e^{-\lambda} d\bar{\omega}(\lambda) \tag{43}$$

585 Given an initial condition  $\tilde{\mathbf{x}}_{t_0} = \mathbf{x}_T$ , the SEEDS-1 iterates read, for  $h_i = \lambda_{t_i} - \lambda_{t_{i-1}} = \lambda_t - \lambda_s$ ,

$$\tilde{\mathbf{x}}_t = \frac{\alpha_t}{\alpha_s} \tilde{\mathbf{x}}_s - 2\bar{\sigma}_t (e^{h_i} - 1) \boldsymbol{\epsilon}_\theta(\tilde{\mathbf{x}}_s, s) - \bar{\sigma}_t \sqrt{e^{2h_i} - 1} \boldsymbol{\epsilon} \quad \boldsymbol{\epsilon} \sim \mathcal{N}(\mathbf{0}, \mathbf{I}_d).$$

586

### 587 Assumption B.1.

588 1. The function  $\boldsymbol{\epsilon}_\theta(\mathbf{x}, t)$  is continuous (and hence bounded) on  $[0, T]$ , Lipschitz with respect to  
589  $\mathbf{x}$  and there is a constant  $C$  such that, for  $t, s \in [0, T]$  with  $t < s$ , we have

$$|\boldsymbol{\epsilon}_\theta(\mathbf{x}, t) - \boldsymbol{\epsilon}_\theta(\mathbf{y}, t)|^2 \leq L_1 |\mathbf{x} - \mathbf{y}|^2 \tag{44}$$

$$|\boldsymbol{\epsilon}_\theta(\mathbf{x}, t)|^2 \vee |g(t)|^2 \leq L_2 (1 + |\mathbf{x}|^2) \tag{45}$$

$$|\boldsymbol{\epsilon}_\theta(\mathbf{x}, t) - \boldsymbol{\epsilon}_\theta(\mathbf{x}, s)|^2 \leq L_3 (1 + |\mathbf{x}|^2) |t - s|^2 \tag{46}$$

590 2.  $h = \max_{1 \leq i \leq M} |h_i| \sim O(1/M)$ , where  $h_i = \lambda_{t_i} - \lambda_{t_{i-1}}$ .

591 Let  $\mathcal{C}_P^l(\mathbb{R}^d, \mathbb{R})$  denote the family of  $L$  times continuously differentiable real-valued functions on  $\mathbb{R}^d$   
592 whose partial derivatives of order  $\leq l$  have polynomial growth and let  $\mathcal{C}_P^{k,l}(I \times \mathbb{R}^d, \mathbb{R})$  be the space  
593 of functions  $g(\cdot, \cdot)$  such that, for all  $(t, x) \in I \times \mathbb{R}^d$ ,  $g(\cdot, x) \in \mathcal{C}^k(I, \mathbb{R})$  and  $g(t, \cdot) \in \mathcal{C}_P^l(\mathbb{R}^d, \mathbb{R})$ .

594

595 **Assumption B.2.** In addition to Assumption B.1, assume that all the components of  $\boldsymbol{\epsilon}_\theta$  belong to  
596  $\mathcal{C}_P^{4,2}(\mathbb{R}^d \times [0, 1], \mathbb{R})$ .

597 Before going into the proofs, we give some context that lead us to necessitate such assumptions.

### 598 B.1 Preliminaries

599 For an interval  $I = [t_0, T]$ , let  $\mathbf{x} = (\mathbf{x}(t))_I$  the solution of the following SDE

$$d\mathbf{x}(t) = f(\mathbf{x}(t), t)dt + g(t)d\omega(t), \tag{47}$$

600 where  $g(t) = \hat{g}(t) \cdot \text{Id}_d$  is considered here as a diagonal matrix with identical diagonal entries  $\hat{g}(t)$ .  
601 Suppose that  $f, g$  are continuous, and satisfy a linear growth and Lipschitz condition so that the  
602 conditions of the Existence and Uniqueness Theorem are fulfilled for the SDE (47).

603 Let  $I_h = \{t_0, \dots, t_M\}$  be a time discretization of  $I$  with step sizes  $h_n = t_{n+1} - t_n$  for  $n =$   
604  $0, \dots, M-1$  and let  $h = \max_{0 \leq n < M} h_n$ . A time discrete approximation scheme  $\hat{\mathbf{x}} = (\hat{\mathbf{x}}_n)_{I_h}$  will  
605 be defined as a sequence  $\hat{\mathbf{x}}_0 = \mathbf{x}(t_0)$  and

$$\hat{\mathbf{x}}_{n+1} = \Phi(\hat{\mathbf{x}}_n, h_n, I_n) \quad n = 0, \dots, M-1$$



where  $I_0$  is independent of  $\hat{\mathbf{x}}_0$ , with  $I_n = \omega(t_{n+1} - t_n)$  Wiener increments drawn from the normal distributions with zero mean and variance  $h_n$  and which are independent of  $\hat{\mathbf{x}}_0, \dots, \hat{\mathbf{x}}_n$  and  $I_0, \dots, I_{n-1}$ .

A scheme  $\hat{\mathbf{x}}$  converges in the strong (resp. weak) sense, with global order  $p > 0$ , to the solution  $\mathbf{x}$  of the SDE (47) if there is a constant  $C > 0$ , independent of  $h$  and  $\delta > 0$ , such that, for each  $h \in ]0, \delta]$ , we have

$$(\mathbb{E}[|\mathbf{x}(T) - \hat{\mathbf{x}}_M|^2])^{1/2} \leq Ch^p, \quad (\text{resp. } |\mathbb{E}[G(\mathbf{x}(T))] - \mathbb{E}[G(\hat{\mathbf{x}}_M)]| \leq Ch^p, \forall G \in \mathcal{C}_P^{2(p+1)}(\mathbb{R}^d, \mathbb{R})).$$

Notice that if  $(\mathbb{E}[|\mathbf{x}(T) - \hat{\mathbf{x}}_M|^2])^{1/2} = \mathcal{O}(h^p)$  then for every function  $f$  satisfying a Lipschitz condition, we have  $|\mathbb{E}[f(\mathbf{x}(T))] - \mathbb{E}[f(\hat{\mathbf{x}}_M)]| = \mathcal{O}(h^p)$ . Nevertheless, this is not enough to infer the optimal weak order of convergence of such method.

Strong convergence is concerned with the precision of the path, while the weak convergence is with the precision of the moments. As, for DPMs, the center of attention is the evolution of the probability densities rather than that of the noising process of single data samples, weak convergence is enough to guarantee the well-conditioning of our numerical schemes. Moreover, when the diffusion coefficient vanishes, then both strong and weak convergence (with the choice  $G = \text{id}$ ) reduce to the usual deterministic convergence criterion for ODEs.

Let us now state some useful results that will be used later on.

**Assumption B.3.** All moments of the initial value  $\hat{\mathbf{x}}_0$  exist,  $f$  is continuous, satisfy a linear growth and globally Lipschitz condition.

In particular, since  $I$  is a closed finite interval in  $\mathbb{R}$ ,  $f(\cdot, x)$  and  $g$  are bounded by some constant.

**Theorem B.4** ([18]). In addition to B.3 suppose that

$$\begin{aligned} |\mathbb{E}[\mathbf{x}(t_1) - \hat{\mathbf{x}}_1]| &\leq Ch^{p_1} \\ (\mathbb{E}[|\mathbf{x}(t_1) - \hat{\mathbf{x}}_1|^2])^{1/2} &\leq Ch^{p_2} \end{aligned}$$

with  $p_2 \geq 1/2$  and  $p_1 \geq p_2 + 1/2$ . Then  $\hat{\mathbf{x}}$  is of strong global order  $p = p_2 - 1/2$ .

**Assumption B.5.** All moments of the initial value  $\hat{\mathbf{x}}_0$  exist,  $f$  is continuous, satisfy a linear growth and Lipschitz condition with all their components belonging to  $\mathcal{C}_P^{p+1, 2(p+1)}(I \times \mathbb{R}^d, \mathbb{R})$  and  $g \in \mathcal{C}^{p+1}(I, \mathbb{R})$ .

**Theorem B.6** ([18]). In addition to B.5 suppose that

1. for large enough  $r \in \mathbb{N}$ , the moments  $\mathbb{E}[|\hat{\mathbf{x}}_n|^{2r}]$  exist and are uniformly bounded with respect to  $M$  and  $n = 0, \dots, M$
2. for all  $G \in \mathcal{C}_P^{2(p+1)}(\mathbb{R}^d, \mathbb{R})$ , if  $\hat{\mathbf{x}}_n = \mathbf{x}(t_n)$ , then for some  $K \in \mathcal{C}_P^0(\mathbb{R}^d, \mathbb{R})$ , we have

$$|\mathbb{E}[G(\mathbf{x}(t_{n+1}))] - \mathbb{E}[G(\hat{\mathbf{x}}_{n+1})]| \leq K(\hat{\mathbf{x}}_n)h^{p+1}.$$

Then  $\hat{\mathbf{x}}$  is of weak global order  $p$ .

**Lemma B.7.** Suppose that  $\hat{\mathbf{x}}_0$  has moments of all orders and that, for  $h < 1$ ,

$$\begin{aligned} |\mathbb{E}[\Phi(\hat{\mathbf{x}}_n, h_n, I_n) - \hat{\mathbf{x}}_n]| &\leq K(1 + |\hat{\mathbf{x}}_n|)h \\ |\Phi(\hat{\mathbf{x}}_n, h_n, I_n) - \hat{\mathbf{x}}_n| &\leq X_n(1 + |\hat{\mathbf{x}}_n|)h^{1/2} \end{aligned}$$

where  $X_n$  has moments of all orders. Then Condition 1 in Theorem B.6 is fulfilled.

## 643 B.2 Convergence of SEEDS-1

644 In this section we will prove that that SEEDS-1 as described above is of global strong order 1.0.

### 645 B.2.1 Strong Itô-Taylor approximation

646 Then the truncated Itô-Taylor expansion of the analytic solution  $\mathbf{x}_t$  of the VP NP NRSDE starting  
647 from  $\mathbf{x}_s$  is given, for  $\epsilon \sim \mathcal{N}(0, 1)$ , by

$$\begin{aligned} \mathbf{x}_t &= \frac{\alpha_t}{\alpha_s} \mathbf{x}_s - 2\alpha_t \int_{\lambda_s}^{\lambda_t} e^{-\lambda} \hat{\epsilon}_\theta(\hat{\mathbf{x}}_\lambda, \lambda) d\lambda - \sqrt{2}\alpha_t \int_{\lambda_s}^{\lambda_t} e^{-\lambda} d\omega_\lambda \\ &= \frac{\alpha_t}{\alpha_s} \mathbf{x}_s - 2\bar{\sigma}_t(e^h - 1)\epsilon_\theta(\mathbf{x}_s, s) - \bar{\sigma}_t\sqrt{e^{2h} - 1}\epsilon + \mathcal{R}_1 \\ &= \frac{\alpha_t}{\alpha_s} \mathbf{x}_s - 2\bar{\sigma}_t(e^h - 1)\epsilon_\theta(\mathbf{x}_s, s) - \bar{\sigma}_t\sqrt{e^{2h} - 1}\epsilon + \mathcal{O}(h) \end{aligned}$$

648 where the symbol  $\mathcal{O}(h^p)$  represent terms  $\mathbf{u}$  such that  $\|\mathbf{u}\| \leq |K(\mathbf{x}_s)|h^p$ , for  $K \in \mathcal{C}_P^0(\mathbb{R}^d, \mathbb{R})$  and  
649 small  $h > 0$ . The SEEDS-1 scheme corresponds to such truncated Itô-Taylor expansion containing  
650 only the time and Wiener integrals of multiplicity one. As such, since  $G_t g(t) = 0$  and assuming  
651 Lipschitz and linear growth conditions on  $\epsilon_\theta$  as in Assumption B.1,  $\mathbf{x}_t$  can be interpreted as an order  
652 1.0 strong Itô-Taylor approximation [13, Theorem 10.6.3] of the solution to (42).

### 653 B.2.2 Continuous approximation of SEEDS-1

654 Let  $\tilde{\alpha}_t := \frac{1}{2}\beta_d t^2 + \beta_m t$ , where  $\beta_d = \beta_{\max} - \beta_{\min} = 19.9$ ,  $\beta_m = \beta_{\min} = 0.1$ . We have

$$\sigma_t = \sqrt{e^{\tilde{\alpha}_t} - 1}, \quad \alpha_t = e^{-\frac{1}{2}\tilde{\alpha}_t} = \frac{1}{\sqrt{\sigma_t^2 + 1}}$$

655 so, in particular, as  $T = 1$ , we have  $\tilde{\alpha}_{t_0} = \tilde{\alpha}_1 = \frac{1}{2}(\beta_{\max} - \beta_{\min}) + \beta_{\min} = \frac{1}{2}(\beta_{\max} + \beta_{\min}) \approx 10.05$   
656 and  $\tilde{\alpha}_{t_{M+1}} = \tilde{\alpha}_0 = 0$ . We deduce  $\alpha_{t_0} = \alpha_1 \approx e^{-\frac{10.05}{2}} < 1$ ,  $\alpha_{t_{M+1}} = \alpha_0 = 1$ . Next,  $\sigma_{t_0} = \sigma_1 \approx$   
657  $\sqrt{e^{10.05} - 1} > 1$  and  $\sigma_{t_{M+1}} = \sigma_0 = 0$ . As such,  $\lambda_{t_0} = -\log(\sigma_1) := -L_0 < 0$  and  $\lambda_t \xrightarrow{t \rightarrow t_{M+1}} +\infty$ .  
658 As such, we will set  $t_M = t_{M+1} + \varepsilon$  the end time so that  $\lambda_{t_M} = L_0$  is finite. This implies that, for  
659  $\lambda \in [-L_0, +\infty[$ ,  $0 < e^{-L_0} \leq e^\lambda < 1 < e^{\lambda_{t_M}}$  and, for  $\hat{T} = \lambda_{t_M} - \lambda_{t_0}$ ,  $e^h = e^{\lambda_t - \lambda_s} \leq e^{\hat{T}}$ . Now  
660 set, for  $\lambda \in [-L_0, +\infty[$ ,

$$\hat{\alpha}_\lambda := \sqrt{\frac{1}{1 + e^{-2\lambda}}}, \quad \hat{\sigma}_\lambda := \sqrt{\frac{1}{1 + e^{2\lambda}}}$$

661 Then, as  $\lambda$  increases,  $\hat{\alpha}_\lambda$  increases starting from  $0 < \hat{\alpha}_{\lambda_{t_0}} < 1$  and  $\hat{\alpha}_\lambda \xrightarrow{\lambda \rightarrow +\infty} 1$  while at the same  
662 time  $\hat{\sigma}_\lambda$  decreases starting from  $0 < \hat{\sigma}_{\lambda_{t_0}} < 1$  and  $\hat{\sigma}_\lambda \xrightarrow{\lambda \rightarrow +\infty} 0$ . As such, we can rewrite the exact  
663 solution (43) as

$$\hat{\mathbf{x}}_{\lambda_t} = \frac{\hat{\alpha}_{\lambda_t}}{\hat{\alpha}_{\lambda_s}} \hat{\mathbf{x}}_{\lambda_s} - 2\hat{\alpha}_{\lambda_t} \int_{\lambda_s}^{\lambda_t} e^{-\lambda} \hat{\epsilon}_\theta(\hat{\mathbf{x}}_\lambda, \lambda) d\lambda - \sqrt{2}\hat{\alpha}_{\lambda_t} \int_{\lambda_s}^{\lambda_t} e^{-\lambda} d\bar{\omega}(\lambda). \quad (48)$$

664 Notice that  $\frac{\hat{\alpha}_{\lambda_t}}{\hat{\alpha}_{\lambda_s}}$  is bounded for all  $t, s$  by

$$\frac{\hat{\alpha}_{\lambda_t}}{\hat{\alpha}_{\lambda_s}} \leq \frac{1}{\hat{\alpha}_{\lambda_{t_0}}}$$

665 and  $0 < \hat{\alpha}_\lambda < 1$  for all  $\lambda \in [-L_0, +\infty[$ .

666 Recall that the SEEDS-1 is defined recursively as

$$\mathbf{y}_{t_0} \leftarrow \mathbf{x}_T, \mathbf{y}_{t_i} \leftarrow \frac{\alpha_{t_i}}{\alpha_{t_{i-1}}} \mathbf{y}_{t_{i-1}} - 2\bar{\sigma}_{t_i}(e^{h_i} - 1)\epsilon_\theta(\mathbf{y}_{t_{i-1}}, t_{i-1}) - \bar{\sigma}_{t_i}\sqrt{e^{2h_i} - 1}\epsilon_i$$

667 and, for simplicity, we will denote  $\mathbf{y}_{\lambda_{t_i}}$  for the iterates (48).

668 Define a continuous approximation of SEEDS-1 as follows. For  $\hat{h} = t - s$ , we write  $\hat{s} = [s/\hat{h}]\hat{h}$   
 669 where  $[x]$  denotes the largest integer lesser or equal to  $x$  and  $I_{[A]}$  is the indicator function associated  
 670 to a set  $A$ . We define the step function:

$$\hat{\mathbf{y}}(\lambda) := \sum_{k \geq 0} I_{[\lambda_{t_k}, \lambda_{t_{k+1}})} [\mathbf{y}_{\lambda_{t_k}}]$$

671 and the continuous approximation

$$\mathbf{y}(t) := \frac{\alpha_t}{\alpha_{t_0}} \mathbf{y}(t_0) - 2\alpha_t \int_{\lambda_{t_0}}^{\lambda_t} e^{-\hat{\lambda}} \hat{\epsilon}_\theta(\hat{\mathbf{y}}(\lambda), \hat{\lambda}) d\lambda - \sqrt{2}\alpha_t \int_{\lambda_{t_0}}^{\lambda_t} e^{-\lambda} d\omega_\lambda,$$

672

673 **Proposition B.8.** *There are two constants  $C_1, C_2$  independent of  $h$  such that, for all  $t \in [0, T]$ , we*  
 674 *have*

$$\begin{aligned} \mathbb{E} \left[ \sup_{t_0 \leq t \leq t_M} |\mathbf{y}(t)|^2 \right] &\leq C_1 \\ \mathbb{E} \left[ |\mathbf{y}(t) - \hat{\mathbf{y}}(t)|^2 \right] &\leq C_2 h^2. \end{aligned}$$

675

676 *Proof.* Recall the standard inequality  $(a + b + c)^2 \leq 3(a^2 + b^2 + c^2)$  for  $a, b, c \in \mathbb{R}$ . Then:

$$|\mathbf{y}(t)|^2 \leq 3 \left[ \left| \frac{\alpha_t}{\alpha_{t_0}} \mathbf{y}_{t_0} \right|^2 + 4\alpha_t^2 \left| \int_{\lambda_{t_0}}^{\lambda_t} e^{-\hat{\lambda}} \hat{\epsilon}_\theta(\hat{\mathbf{y}}(\lambda), \hat{\lambda}) d\lambda \right|^2 + 2\alpha_t^2 \left| \int_{\lambda_{t_0}}^{\lambda_t} e^{-\lambda} d\omega_\lambda \right|^2 \right]$$

677 Using the fact that  $\alpha_t \leq 1$ , we have, by writing  $\hat{T} = \lambda_{t_M} - \lambda_{t_0}$  and taking the expectation:

$$\begin{aligned} &\mathbb{E} \left[ \sup_{t_0 \leq t \leq t_M} |\mathbf{y}(t)|^2 \right] \\ &\leq 3 \left[ \left| \frac{\alpha_t}{\alpha_{t_0}} \right|^2 \mathbb{E} [|\mathbf{y}_{t_0}|^2] + 4\mathbb{E} \left[ \left| \int_{\lambda_{t_0}}^{\lambda_t} e^{-\hat{\lambda}} \hat{\epsilon}_\theta(\hat{\mathbf{y}}(\lambda), \hat{\lambda}) d\lambda \right|^2 \right] + 2\alpha_t^2 \mathbb{E} \left[ \left| \int_{\lambda_{t_0}}^{\lambda_t} e^{-\lambda} d\omega_\lambda \right|^2 \right] \right] \\ &\leq 3 \left[ \left| \frac{\alpha_t}{\alpha_{t_0}} \right|^2 \mathbb{E} [|\mathbf{y}_{t_0}|^2] + 4\hat{T} \mathbb{E} \left[ \int_{\lambda_{t_0}}^{\lambda_t} |e^{-\hat{\lambda}}|^2 |\hat{\epsilon}_\theta(\hat{\mathbf{y}}(\lambda), \hat{\lambda})|^2 d\lambda \right] + 2\alpha_t^2 \mathbb{E} \left[ \int_{\lambda_{t_0}}^{\lambda_t} |e^{-\lambda}|^2 d\lambda \right] \right] \\ &\leq 3 \left[ \left| \frac{\alpha_t}{\alpha_{t_0}} \right|^2 \mathbb{E} [|\mathbf{y}_{t_0}|^2] + 4\hat{T} \int_{\lambda_{t_0}}^{\lambda_t} |e^{-\hat{\lambda}}|^2 \mathbb{E} [|\hat{\epsilon}_\theta(\hat{\mathbf{y}}(\lambda), \hat{\lambda})|^2] d\lambda + 2\alpha_t^2 \int_{\lambda_{t_0}}^{\lambda_t} e^{-2\lambda} d\lambda \right] \\ &\leq 3K \left[ \mathbb{E} [|\mathbf{y}_{t_0}|^2] + 4\hat{T} \int_{\lambda_{t_0}}^{\lambda_t} \mathbb{E} [|\hat{\epsilon}_\theta(\hat{\mathbf{y}}(\lambda), \hat{\lambda})|^2] d\lambda + (e^{2(\lambda_t - \lambda_{t_0})} - 1) \right] \\ &\leq 3K \left[ \mathbb{E} [|\mathbf{y}_{t_0}|^2] + 4\hat{T} L_2 \int_{\lambda_{t_0}}^{\lambda_t} (1 + \mathbb{E} [|\hat{\mathbf{y}}(\lambda)|^2]) d\lambda + (e^{2\hat{T}} - 1) \right] \\ &\leq 3K \left[ \mathbb{E} [|\mathbf{y}_{t_0}|^2] + 4\hat{T} L_2 \hat{T} + e^{2\hat{T}} - 1 + 4\hat{T} L_2 \int_{\lambda_{t_0}}^{\lambda_t} \mathbb{E} [|\hat{\mathbf{y}}(\lambda)|^2] d\lambda \right] \\ &\leq 3K \left( \mathbb{E} [|\mathbf{y}_{t_0}|^2] + 4\hat{T} L_2 \hat{T} + e^{2\hat{T}} - 1 \right) + 3K 4\hat{T} L_2 \int_{\lambda_{t_0}}^{\lambda_t} \mathbb{E} [|\hat{\mathbf{y}}(\lambda)|^2] d\lambda \\ &\leq 3K \left( \mathbb{E} [|\mathbf{x}(t_0)|^2] + 4\hat{T}^2 L_2 + e^{2\hat{T}} - 1 \right) + 12K \hat{T} L_2 \int_{\lambda_{t_0}}^{\lambda_t} \mathbb{E} \left[ \sup_{\lambda_0 \leq r \leq \lambda} |\mathbf{y}(r)|^2 \right] d\lambda \end{aligned}$$

678 where we used the linearity of expectation, Hölder's inequality, Doob's martingale inequality, Itô  
 679 isometry, the linear growth condition of  $\hat{\epsilon}_\theta$ , and we set  $K = \max \left( \left| \frac{\alpha_t}{\alpha_{t_0}} \right|^2, |e^{L_0}|^2, \bar{\sigma}_t^2, 1 \right)$ . As we

680 know that  $\mathbb{E} [|\mathbf{x}(t_0)|^2] < \infty$ , we apply Grönwall's inequality in the last line to obtain

$$\mathbb{E} \left[ \sup_{t_0 \leq t \leq t_M} |\mathbf{y}(t)|^2 \right] \leq C_1, \quad C_1 := 3K \left[ \mathbb{E} [|\mathbf{x}(t_0)|^2] + 4\hat{T}^2 L_2 + e^{2\hat{T}} - 1 \right] e^{12K\hat{T}L_2}.$$

681 Second, we have, for  $s = t_i$ ,  $u = t_{i+1}$  and  $t \in [t_\lambda(u), t_\lambda(s)]$ ,

$$\mathbf{y}(t) - \hat{\mathbf{y}}(t) = \left( \frac{\alpha_t}{\alpha_s} - 1 \right) \mathbf{y}_s - 2\alpha_t \int_{\lambda_s}^{\lambda_t} e^{-\hat{\lambda}} \hat{\epsilon}_\theta(\mathbf{y}_{\lambda_s}, \lambda_s) d\lambda,$$

682 so that, using Hölder's inequality, we get

$$|\mathbf{y}(t) - \hat{\mathbf{y}}(t)|^2 \leq 3 \left[ \left| \frac{\alpha_t}{\alpha_s} - 1 \right|^2 |\mathbf{y}_s|^2 + 4h \int_{\lambda_s}^{\lambda_t} |e^{-\hat{\lambda}}|^2 |\hat{\epsilon}_\theta(\mathbf{y}_{\lambda_s}, \lambda_s)|^2 d\lambda \right].$$

683 Now using Itô isometry we obtain:

$$\mathbb{E} [|\mathbf{y}(t) - \hat{\mathbf{y}}(t)|^2] \leq 3 \left[ \left| \frac{\alpha_t}{\alpha_s} - 1 \right|^2 \mathbb{E} [|\mathbf{y}_s|^2] + 4h \mathbb{E} \left[ \int_{\lambda_s}^{\lambda_t} |e^{-\hat{\lambda}}|^2 |\hat{\epsilon}_\theta(\mathbf{y}_{\lambda_s}, \lambda_s)|^2 d\lambda \right] \right].$$

684 Now, using the bound  $\mathbb{E} [\max |\mathbf{y}_t|^2] \leq C_1$ , the fact that  $\epsilon_\theta$  is bounded and the same arguments as  
685 above, we get

$$\begin{aligned} \mathbb{E} [|\mathbf{y}(t) - \hat{\mathbf{y}}(t)|^2] &\leq 3 \left[ \left| \frac{\alpha_t}{\alpha_s} - 1 \right|^2 C_1 + 4Kh \mathbb{E} \left[ \int_{\lambda_s}^{\lambda_t} |\hat{\epsilon}_\theta(\mathbf{y}_{\lambda_s}, \lambda_s)|^2 d\lambda \right] \right] \\ &\leq 3 \left[ \left| \frac{\alpha_t}{\alpha_s} - 1 \right|^2 C_1 + 4KhL_2 \int_{\lambda_s}^{\lambda_t} (1 + C_1) d\lambda \right] \\ &\leq 3 \left[ \left| \frac{\alpha_t}{\alpha_s} - 1 \right|^2 C_1 + 4Kh^2 L_2 (1 + C_1) \right]. \end{aligned}$$

686 Finally, as we have

$$e^h = \frac{\sigma_s}{\sigma_t} = \frac{\alpha_t}{\alpha_s} \frac{\sqrt{1 - \alpha_s^2}}{\sqrt{1 - \alpha_t^2}},$$

687 and  $1 < \frac{\sqrt{1 - \alpha_s^2}}{\sqrt{1 - \alpha_t^2}} \xrightarrow{M \rightarrow \infty} 1$ , we obtain  $\left| \frac{\alpha_t}{\alpha_s} - 1 \right|^2 \sim |e^h - 1|^2 \sim \mathcal{O}(h^2)$ . Now, by denoting  $|e^h - 1|^2 \leq$   
688  $K_2 h^2$ , we conclude that

$$\mathbb{E} [|\mathbf{y}(t) - \hat{\mathbf{y}}(t)|^2] \leq C_2 h^2,$$

689 with  $C_2 := 3K_2 C_1 + 4KL_2(1 + C_1)$ . This finishes the proof.  $\square$

690

### 691 **B.2.3 Proof of Theorem 4.1**

692 Let's now take a look at the approximation given  $\mathbf{y}_{t_0} = \mathbf{x}_{t_0}$ . We have

$$\mathbf{y}_t - \mathbf{x}_t = 2\alpha_t \int_{\lambda_{t_0}}^{\lambda_t} \left[ e^{-\lambda} \hat{\epsilon}_\theta(\hat{\mathbf{x}}_\lambda, \lambda) - e^{-\hat{\lambda}} \hat{\epsilon}_\theta(\hat{\mathbf{y}}_\lambda, \hat{\lambda}) \right] d\lambda.$$

693 Using the inequality  $\alpha_t \leq 1$ , the Lipschitz property of  $\hat{\epsilon}_\theta$ , Assumption (B.1), and Hölder's inequality  
694 we deduce the bound:

$$\begin{aligned} |\mathbf{y}_t - \mathbf{x}_t|^2 &\leq 2 \left[ 4 \left| \int_{\lambda_{t_0}}^{\lambda_t} \left[ e^{-\lambda} \hat{\epsilon}_\theta(\hat{\mathbf{x}}_\lambda, \lambda) - e^{-\hat{\lambda}} \hat{\epsilon}_\theta(\hat{\mathbf{y}}_\lambda, \hat{\lambda}) \right] d\lambda \right|^2 \right] \\ &\leq 8\hat{T} \int_{\lambda_{t_0}}^{\lambda_t} \left| e^{-\lambda} \hat{\epsilon}_\theta(\hat{\mathbf{x}}_\lambda, \lambda) - e^{-\hat{\lambda}} \hat{\epsilon}_\theta(\hat{\mathbf{y}}_\lambda, \hat{\lambda}) \right|^2 d\lambda. \end{aligned}$$

695 Taking the expectation yields

$$\begin{aligned} & \mathbb{E} \left[ \sup_{t_0 \leq s \leq t} |\mathbf{y}_s - \mathbf{x}_s|^2 \right] \\ & \leq 8\hat{T}\mathbb{E} \left[ \int_{\lambda_{t_0}}^{\lambda_t} \left| e^{-\lambda} \hat{\boldsymbol{\epsilon}}_{\theta}(\hat{\mathbf{x}}_{\lambda}, \lambda) - e^{-\hat{\lambda}} \hat{\boldsymbol{\epsilon}}_{\theta}(\hat{\mathbf{y}}_{\lambda}, \hat{\lambda}) \right|^2 d\lambda \right]. \end{aligned}$$

696 Now, for the first integral, by writing:

$$\begin{aligned} & e^{-\lambda} \hat{\boldsymbol{\epsilon}}_{\theta}(\hat{\mathbf{x}}_{\lambda}, \lambda) - e^{-\hat{\lambda}} \hat{\boldsymbol{\epsilon}}_{\theta}(\hat{\mathbf{y}}_{\lambda}, \hat{\lambda}) \\ & = e^{-\lambda} \hat{\boldsymbol{\epsilon}}_{\theta}(\hat{\mathbf{x}}_{\lambda}, \lambda) - e^{-\hat{\lambda}} \hat{\boldsymbol{\epsilon}}_{\theta}(\hat{\mathbf{x}}_{\lambda}, \lambda) + e^{-\hat{\lambda}} \hat{\boldsymbol{\epsilon}}_{\theta}(\hat{\mathbf{x}}_{\lambda}, \lambda) - e^{-\hat{\lambda}} \hat{\boldsymbol{\epsilon}}_{\theta}(\hat{\mathbf{x}}_{\lambda}, \hat{\lambda}) \\ & \quad + e^{-\hat{\lambda}} \hat{\boldsymbol{\epsilon}}_{\theta}(\hat{\mathbf{x}}_{\lambda}, \hat{\lambda}) - e^{-\hat{\lambda}} \hat{\boldsymbol{\epsilon}}_{\theta}(\mathbf{y}_{\lambda}, \hat{\lambda}) + e^{-\hat{\lambda}} \hat{\boldsymbol{\epsilon}}_{\theta}(\mathbf{y}_{\lambda}, \hat{\lambda}) - e^{-\hat{\lambda}} \hat{\boldsymbol{\epsilon}}_{\theta}(\hat{\mathbf{y}}_{\lambda}, \hat{\lambda}) \\ & = (e^{-\lambda} - e^{-\hat{\lambda}}) \hat{\boldsymbol{\epsilon}}_{\theta}(\hat{\mathbf{x}}_{\lambda}, \lambda) + e^{-\hat{\lambda}} \left( \hat{\boldsymbol{\epsilon}}_{\theta}(\hat{\mathbf{x}}_{\lambda}, \lambda) - \hat{\boldsymbol{\epsilon}}_{\theta}(\hat{\mathbf{x}}_{\lambda}, \hat{\lambda}) \right) \\ & \quad + e^{-\hat{\lambda}} \left( \hat{\boldsymbol{\epsilon}}_{\theta}(\hat{\mathbf{x}}_{\lambda}, \hat{\lambda}) - \hat{\boldsymbol{\epsilon}}_{\theta}(\mathbf{y}_{\lambda}, \hat{\lambda}) + \hat{\boldsymbol{\epsilon}}_{\theta}(\mathbf{y}_{\lambda}, \hat{\lambda}) - \hat{\boldsymbol{\epsilon}}_{\theta}(\hat{\mathbf{y}}_{\lambda}, \hat{\lambda}) \right), \end{aligned}$$

697 we can state the following inequalities:

$$\begin{aligned} & \mathbb{E} \left[ \int_{\lambda_{t_0}}^{\lambda_t} \left| e^{-\lambda} \hat{\boldsymbol{\epsilon}}_{\theta}(\hat{\mathbf{x}}_{\lambda}, \lambda) - e^{-\hat{\lambda}} \hat{\boldsymbol{\epsilon}}_{\theta}(\hat{\mathbf{y}}_{\lambda}, \hat{\lambda}) \right|^2 d\lambda \right] \\ & \leq 3 \int_{\lambda_{t_0}}^{\lambda_t} |e^{-\lambda} - e^{-\hat{\lambda}}|^2 \mathbb{E} \left[ |\hat{\boldsymbol{\epsilon}}_{\theta}(\hat{\mathbf{x}}_{\lambda}, \lambda)|^2 \right] d\lambda + 3\mathbb{E} \left[ \int_{\lambda_{t_0}}^{\lambda_t} |e^{-\hat{\lambda}}|^2 \left| \hat{\boldsymbol{\epsilon}}_{\theta}(\hat{\mathbf{x}}_{\lambda}, \lambda) - \hat{\boldsymbol{\epsilon}}_{\theta}(\hat{\mathbf{x}}_{\lambda}, \hat{\lambda}) \right|^2 d\lambda \right] \\ & \quad + 3\mathbb{E} \left[ \int_{\lambda_{t_0}}^{\lambda_t} |e^{-\hat{\lambda}}|^2 \left| \hat{\boldsymbol{\epsilon}}_{\theta}(\hat{\mathbf{x}}_{\lambda}, \hat{\lambda}) - \hat{\boldsymbol{\epsilon}}_{\theta}(\mathbf{y}_{\lambda}, \hat{\lambda}) + \hat{\boldsymbol{\epsilon}}_{\theta}(\mathbf{y}_{\lambda}, \hat{\lambda}) - \hat{\boldsymbol{\epsilon}}_{\theta}(\hat{\mathbf{y}}_{\lambda}, \hat{\lambda}) \right|^2 d\lambda \right] \\ & \leq 3 \int_{\lambda_{t_0}}^{\lambda_t} |e^{-\lambda} - e^{-\hat{\lambda}}|^2 \mathbb{E} \left[ |\hat{\boldsymbol{\epsilon}}_{\theta}(\hat{\mathbf{x}}_{\lambda}, \lambda)|^2 \right] d\lambda + 3KL_3\mathbb{E} \left[ \int_{\lambda_{t_0}}^{\lambda_t} (1 + |\hat{\mathbf{x}}_{\lambda}|^2) |(\lambda - \hat{\lambda})|^2 d\lambda \right] \\ & \quad + 3\mathbb{E} \left[ \int_{\lambda_{t_0}}^{\lambda_t} |e^{-\hat{\lambda}}|^2 \left| \hat{\boldsymbol{\epsilon}}_{\theta}(\hat{\mathbf{x}}_{\lambda}, \hat{\lambda}) - \hat{\boldsymbol{\epsilon}}_{\theta}(\mathbf{y}_{\lambda}, \hat{\lambda}) + \hat{\boldsymbol{\epsilon}}_{\theta}(\mathbf{y}_{\lambda}, \hat{\lambda}) - \hat{\boldsymbol{\epsilon}}_{\theta}(\hat{\mathbf{y}}_{\lambda}, \hat{\lambda}) \right|^2 d\lambda \right] \\ & \leq 3L_2 \int_{\lambda_{t_0}}^{\lambda_t} |e^{-\hat{\lambda}}|^2 |e^{\lambda - \hat{\lambda}} - 1|^2 (1 + \mathbb{E}[|\hat{\mathbf{x}}_{\lambda}|^2]) d\lambda + 3KL_3 h^2 \mathbb{E} \int_{\lambda_{t_0}}^{\lambda_t} (1 + |\hat{\mathbf{x}}_{\lambda}|^2) d\lambda \\ & \quad + 3KL_1 \int_{\lambda_{t_0}}^{\lambda_t} \mathbb{E} \left[ |\hat{\mathbf{x}}_{\lambda} - \mathbf{y}_{\lambda} + \mathbf{y}_{\lambda} - \hat{\mathbf{y}}_{\lambda}|^2 \right] d\lambda. \end{aligned}$$

698 Thus, we obtain

$$\begin{aligned} & \mathbb{E} \left[ \int_{\lambda_{t_0}}^{\lambda_t} \left| e^{-\lambda} \hat{\boldsymbol{\epsilon}}_{\theta}(\hat{\mathbf{x}}_{\lambda}, \lambda) - e^{-\hat{\lambda}} \hat{\boldsymbol{\epsilon}}_{\theta}(\hat{\mathbf{y}}_{\lambda}, \hat{\lambda}) \right|^2 d\lambda \right] \\ & \leq 3L_2 K \hat{T} |e^h - 1|^2 (1 + C_1) + 3L_3 h^2 K (1 + C_1) \hat{T} \\ & \quad + 3KL_1 \int_{\lambda_{t_0}}^{\lambda_t} \mathbb{E} \left[ |\hat{\mathbf{x}}_{\lambda} - \mathbf{y}_{\lambda} + \mathbf{y}_{\lambda} - \hat{\mathbf{y}}_{\lambda}|^2 \right] d\lambda \\ & \leq 3L_2 K \hat{T} |e^h - 1|^2 (1 + C_1) + 3L_3 h^2 K (1 + C_1) \hat{T} \\ & \quad + 6KL_1 \int_{\lambda_{t_0}}^{\lambda_t} \mathbb{E} \left[ |\hat{\mathbf{x}}_{\lambda} - \mathbf{y}_{\lambda}|^2 + |\mathbf{y}_{\lambda} - \hat{\mathbf{y}}_{\lambda}|^2 \right] d\lambda \end{aligned}$$

$$\begin{aligned}
&\leq 3L_2K\hat{T}|e^h - 1|^2(1 + C_1) + 3L_3h^2K(1 + C_1)\hat{T} \\
&\quad + 6KL_1\hat{T}C_2h^2 + 6KL_1 \int_{\lambda_{t_0}}^{\lambda_t} \mathbb{E} [|\hat{\mathbf{x}}_\lambda - \mathbf{y}_\lambda|^2] d\lambda \\
&\leq 3L_2K\hat{T}|e^h - 1|^2(1 + C_1) + 3L_3h^2K(1 + C_1)\hat{T} \\
&\quad + 6KL_1\hat{T}C_2h^2 + 6KL_1 \int_{\lambda_{t_0}}^{\lambda_t} \mathbb{E} \left[ \sup_{\lambda_0 \leq r \leq \lambda} |\hat{\mathbf{x}}(r) - \mathbf{y}(r)|^2 \right] d\lambda \\
&\leq 3K\hat{T}(1 + C_1)[L_2|e^h - 1|^2 + L_3h^2] + 6KL_1\hat{T}C_2h^2 \\
&\quad + 6KL_1 \int_{\lambda_{t_0}}^{\lambda_t} \mathbb{E} \left[ \sup_{\lambda_0 \leq r \leq \lambda} |\hat{\mathbf{x}}(r) - \mathbf{y}(r)|^2 \right] d\lambda.
\end{aligned}$$

Putting everything together yields

$$\begin{aligned}
&\mathbb{E} \left[ \sup_{t_0 \leq s \leq t} |\mathbf{y}_s - \mathbf{x}_s|^2 \right] \\
&\leq 8\hat{T}[3K\hat{T}(1 + C_1)[L_2|e^h - 1|^2 + L_3h] + 6KL_1\hat{T}C_2h^2] \\
&\quad + 8\hat{T}6KL_1 \int_{\lambda_{t_0}}^{\lambda_t} \mathbb{E} \left[ \sup_{\lambda_0 \leq r \leq \lambda} |\hat{\mathbf{x}}(r) - \mathbf{y}(r)|^2 \right] d\lambda \\
&\leq 24K\hat{T}^2(1 + C_1)[L_2|e^h - 1|^2 + L_3h^2] + 48KL_1\hat{T}^2C_2h^2 \\
&\quad + 48\hat{T}KL_1 \int_{\lambda_{t_0}}^{\lambda_t} \mathbb{E} \left[ \sup_{\lambda_0 \leq r \leq \lambda} |\hat{\mathbf{x}}(r) - \mathbf{y}(r)|^2 \right] d\lambda.
\end{aligned}$$

Now, by denoting  $|e^h - 1|^2 \leq K_2h^2$ , we apply the continuous version of the Grönwall Lemma to obtain:

$$\mathbb{E} \left[ \sup_{t_0 \leq s \leq t} |\mathbf{y}_t - \mathbf{x}_t|^2 \right] \leq C_0h^2,$$

where

$$C_0 = [24K\hat{T}^2(1 + C_1)[L_2K_2 + L_3] + 48K\hat{T}^2L_1C_2]e^{48\hat{T}KL_1}.$$

Finally, using Lyapunov's inequality we obtain, for  $C = \sqrt{C_0}$

$$\mathbb{E}[|\mathbf{y}_T - \mathbf{x}_T|] \leq (\mathbb{E}[|\mathbf{y}_T - \mathbf{x}_T|^2])^{1/2} \leq Ch.$$

In other words, for  $C$  as stated above, we have the following inequality

$$\sqrt{\mathbb{E} \left[ \sup_{t_0 \leq t \leq t_M} |\tilde{\mathbf{x}}_t - \mathbf{x}_t|^2 \right]} \leq Ch, \quad \text{as } h \rightarrow 0.$$

Remark B.9.

From the above, it is easy to induce that the following order for the one step error

$$\mathbb{E}[|\mathbf{x}(t_1) - \mathbf{y}_1|^2] = \mathcal{O}(h^3).$$

Now, since  $G_t g(t) = 0$  in this case (additive noise), it is easy to see from the truncated Itô-Taylor expansion of  $\mathbf{x}$  that  $|\mathbb{E}[\mathbf{x}(t_1) - \mathbf{y}_1]| = \mathcal{O}(h^2)$ . As such, we apply Theorem B.4 to conclude that SEEDS-1 has strong convergence of global order 1.0.

## B.2.4 Discrete-time approximation

By Theorem 4.1, we know that SEEDS-1, being of strong order 1.0, it is immediately also of weak order 1. Nonetheless, let's give a discrete approach of this statement that we will use for the proofs of convergence for the remaining solvers as stated in Corollary 4.3. Define the discrete time process:

$$\mathbf{y}_{t_0} \leftarrow \mathbf{x}_T, \mathbf{y}_{t_i} \leftarrow \frac{\alpha_{t_i}}{\alpha_{t_{i-1}}} \mathbf{y}_{t_{i-1}} - 2\sigma_{t_i}(e^{h_i} - 1)\epsilon(\mathbf{y}_{t_{i-1}}, t_{i-1}) - \sqrt{2}\alpha_{t_i} \int_{\lambda_{t_{i-1}}}^{\lambda_{t_i}} e^{-s} d\bar{\omega}(s).$$

716 We will prove that  $\mathbb{E}[|\mathbf{y}_{t_M} - \mathbf{x}_{t_M}|]$  is of order  $h$  as  $h \rightarrow 0$ . Note that  $(\mathbf{y}_{t_i})_i$  has the same distribution  
 717 as  $(\tilde{\mathbf{x}}_{t_i})_i$  described in Algorithm 2 since the stochastic integrals  $\left(\int_{\lambda_{t_{i-1}}}^{\lambda_{t_i}} e^{-s} d\tilde{\omega}(s)\right)_i$  are independent  
 718 and each  $\int_{\lambda_{t_{i-1}}}^{\lambda_{t_i}} e^{-s} d\tilde{\omega}(s)$  is distributed as  $\frac{1}{\sqrt{2}} \frac{\sigma_{t_i}}{\alpha_{t_i}} \sqrt{e^{2h_i} - 1} \epsilon$  with  $h_i = \lambda_{t_i} - \lambda_{t_{i-1}}$ ,  $\epsilon \sim \mathcal{N}(\mathbf{0}, \mathbf{I}_d)$ .  
 719 We have:

$$\mathbf{y}_{t_i} - \mathbf{x}_{t_i} = \frac{\alpha_{t_i}}{\alpha_{t_{i-1}}}(\mathbf{y}_{t_{i-1}} - \mathbf{x}_{t_{i-1}}) + 2\alpha_{t_i} \int_{\lambda_{t_{i-1}}}^{\lambda_{t_i}} e^{-\lambda} (\hat{\epsilon}(\tilde{\mathbf{x}}_\lambda, \lambda) - \epsilon(\mathbf{y}_{t_{i-1}}, t_{i-1})) d\lambda.$$

720 For simplicity, in what follows  $C$  will denote a constant not dependent on the subdivision of  $[0, T]$   
 721 that may change from one line to the next by systematically denoting the maximum value of the  
 722 different constants appearing in the line before. Using the inequality  $\alpha_t \leq 1$ , the Lipschitz property  
 723 of  $\epsilon$ , we deduce the bound:

$$|\mathbf{y}_{t_i} - \mathbf{x}_{t_i}| \leq \frac{\alpha_{t_i}}{\alpha_{t_{i-1}}} |\mathbf{y}_{t_{i-1}} - \mathbf{x}_{t_{i-1}}| + C \left[ \int_{\lambda_{t_{i-1}}}^{\lambda_{t_i}} e^{-\lambda} |\tilde{\mathbf{x}}_\lambda - \mathbf{y}_{t_{i-1}}| d\lambda + \int_{\lambda_{t_{i-1}}}^{\lambda_{t_i}} e^{-\lambda} |t_\lambda(\lambda) - t_{i-1}| d\lambda \right].$$

724 Notice that

$$\begin{aligned} \int_{\lambda_{t_{i-1}}}^{\lambda_{t_i}} e^{-\lambda} |\tilde{\mathbf{x}}_\lambda - \mathbf{y}_{t_{i-1}}| d\lambda &\leq \int_{\lambda_{t_{i-1}}}^{\lambda_{t_i}} e^{-\lambda} |\tilde{\mathbf{x}}_\lambda - \mathbf{x}_{t_{i-1}}| d\lambda + \int_{\lambda_{t_{i-1}}}^{\lambda_{t_i}} e^{-\lambda} |\mathbf{x}_{t_{i-1}} - \mathbf{y}_{t_{i-1}}| d\lambda \\ &\leq \int_{\lambda_{t_{i-1}}}^{\lambda_{t_i}} e^{-\lambda} |\tilde{\mathbf{x}}_\lambda - \mathbf{x}_{t_{i-1}}| d\lambda + Ch |\mathbf{x}_{t_{i-1}} - \mathbf{y}_{t_{i-1}}|, \end{aligned}$$

725 and recall that  $\hat{\mathbf{x}}_u = \mathbf{x}_{t_\lambda(u)}$ . Using the fact that  $t_\lambda$  is increasing and Lemma B.11, we have:

$$\mathbb{E} \left[ \int_{\lambda_{t_{i-1}}}^{\lambda_{t_i}} e^{-\lambda} |\tilde{\mathbf{x}}_\lambda - \mathbf{x}_{t_{i-1}}| d\lambda \right] \leq C \int_{\lambda_{t_{i-1}}}^{\lambda_{t_i}} e^{-u} \sqrt{|t_\lambda - t_{i-1}|} d\lambda \leq Ch^{3/2}.$$

726 Introduce  $U_i = \mathbb{E}[|\mathbf{y}_{t_i} - \mathbf{x}_{t_i}|]$ . Since  $\int_{\lambda_{t_{i-1}}}^{\lambda_{t_i}} e^{-\lambda} |t_\lambda(\lambda) - t_{i-1}| d\lambda \leq Ch^2$ :

$$U_i \leq \left( \frac{\alpha_{t_i}}{\alpha_{t_{i-1}}} + Ch \right) U_{i-1} + Ch^2.$$

727 Let  $a_i = \frac{\alpha_{t_i}}{\alpha_{t_{i-1}}} + Ch$  and  $b_i = Ch^2$ . By applying Lemma B.12, we have:  $U_M \leq A_M U_0 +$

728  $\sum_{k=1}^M A_{k,M} b_k$  with  $A_M = \prod_{k=1}^M a_k$  and  $A_{k,M} = A_M / A_k = \prod_{i=k+1}^M a_i$ . Note that  $U_0 = 0$  since  
 729  $\mathbf{y}_{t_0} = \mathbf{x}_T$  and so:

$$U_M \leq Ch^2 \sum_{k=0}^{M-1} \left( \sup_{1 \leq i \leq M} a_i \right)^k.$$

730 Using our hypothesis, we can bound:

$$\sum_{k=0}^{M-1} \left( \sup_{1 \leq i \leq M} a_i \right)^k \leq \sum_{k=0}^{M-1} (\exp(Ch) + Ch)^k = \frac{(\exp(Ch) + Ch)^{1/h} - 1}{(\exp(Ch) + Ch) - 1}.$$

731 The quantity on the right is of order  $C/h$ . Indeed, as  $h$  goes to 0,  $\exp(Ch) + Ch - 1$  is equivalent  
 732 to  $2Ch$  and  $(\exp(Ch) + Ch)^{1/h}$  converges to a constant. This gives the bound  $U_M \leq Ch$ , when  
 733  $h \rightarrow 0$  and by using Proposition B.8 and Theorem B.6 we conclude that SEEDS-1 is convergent of  
 734 weak order 1.

735

## 736 B.2.5 Useful Lemmas

737 **Lemma B.10.** (Continuous Grönwall Lemma) Let  $I = [a, b]$  denote a compact interval of the  
 738 real line with  $a < b$ . Let  $\alpha, \beta, u$  be continuous real-valued functions defined on  $I$ . Assume  $\beta$  is  
 739 non-negative,  $\alpha$  is non-decreasing and  $u$  satisfies the integral inequality

$$u(t) \leq \alpha(t) + \int_a^t \beta(s) u(s) ds, \quad \forall t \in I.$$

740 Then

$$u(t) \leq \alpha(t) \exp \left( \int_a^t \beta(s) ds \right), \quad \forall t \in I.$$

741

742 **Lemma B.11.** Assume the following forward SDE is satisfied  $dX_t = F(t, X_t)dt + G(t)dW_t, t \in$   
 743  $[0, T]$ , where  $T > 0$ ,  $F(t, x)$  is Lipschitz with respect to  $(t, x)$ ,  $G$  is continuous and  $X_0$  is an  
 744 integrable random variable. Then, there exists  $C > 0$  such that for all  $s < t \in [0, T]$  with  $t - s \leq 1$ ,

$$\mathbb{E}[|X_t - X_s|] \leq C\sqrt{t - s}.$$

745

746 *Proof.* We take  $s = 0$  and apply the triangular inequality:

$$|X_t - X_0| \leq \int_0^t |F(u, X_u) - F(0, X_0)| du + \left| \int_0^t G(u) dW_u \right| + t|F(0, X_0)|.$$

747 Setting  $u(t) = \mathbb{E}[|X_t - X_0|]$  and taking the expectation, we deduce:

$$u(t) \leq K \frac{t^2}{2} + t\mathbb{E}[|F(0, X_0)|] + \mathbb{E}[\left(\int_0^t G(u) dW_u\right)^2]^{\frac{1}{2}} + K \int_0^t u(s) ds,$$

748 where  $K$  is a positive constant. Note that  $\mathbb{E}[\left(\int_0^t G(u) dW_u\right)^2]^{\frac{1}{2}} = [\int_0^t G^2(s) ds]^{\frac{1}{2}}$  by the Itô isometry  
 749 property which is less than  $C\sqrt{t}$  since  $G$  is continuous. Thus, we have proved that:

$$u(t) \leq \alpha(t) + K \int_0^t u(s) ds,$$

750 where  $\alpha(t) = K \frac{t^2}{2} + t\mathbb{E}[|F(0, X_0)|] + C\sqrt{t}$  is non-decreasing. By Lemma B.10  $u(t) \leq$   
 751  $\alpha(t) \exp(Kt) \leq \alpha(t) \exp(KT)$ . Since  $\alpha(t) \leq C\sqrt{t}$  for  $t \in [0, 1]$ , the lemma holds. □

752

753 **Lemma B.12.** (Discrete Grönwall Lemma) Consider a real number sequence  $(u_n)_n$  such that

$$u_{n+1} \leq a_{n+1}u_n + b_{n+1}, n \geq 0$$

754 where  $(a_n)$  and  $(b_n)_n$  are two given sequences such that  $b_n$  is positive. Then

$$u_n \leq A_n u_0 + \sum_{k=1}^n A_{k,n} b_k,$$

755 where  $A_n = \prod_{k=1}^n a_k$  and  $A_{k,n} = A_n / A_k = \prod_{i=k+1}^n a_i$ .

756

### 757 B.3 Proof of Corollary 4.3

#### 758 B.3.1 Convergence of SEEDS-2:

759 Let  $\{y_{t_i}\}_i$  be the discrete stochastic process defined as follows:

$$y_{t_0} \leftarrow \mathbf{x}_T, y_{t_i} \leftarrow \frac{\alpha_{t_i}}{\alpha_{t_{i-1}}} y_{t_{i-1}} - 2\alpha_{t_i} \int_{\lambda_{t_{i-1}}}^{\lambda_{t_i}} e^{-u} \epsilon(\mathbf{u}_i, s_i) du - \sqrt{2}\alpha_{t_i} \int_{\lambda_{t_{i-1}}}^{\lambda_{t_i}} e^{-s} d\bar{\omega}(s),$$

760 with  $s_i \leftarrow t_\lambda(\lambda_{t_{i-1}} + \frac{h_i}{2})$  and

$$\mathbf{u}_i \leftarrow \frac{\alpha_{s_i}}{\alpha_{t_{i-1}}} y_{t_{i-1}} - 2\sigma_{s_i} \left( e^{\frac{h_i}{2}} - 1 \right) \epsilon(y_{t_{i-1}}, t_{i-1}) - \sqrt{2}\alpha_{s_i} \int_{\lambda_{t_{i-1}}}^{\lambda_{s_i}} e^{-s} d\bar{\omega}(s),$$



761 Then  $\{\mathbf{y}_{t_i}\}_i$  has the same distribution as  $\{\tilde{\mathbf{x}}_{t_i}\}_i$  in Algorithm 3. We can compute the difference:

$$\mathbf{y}_{t_i} - \mathbf{x}_{t_i} = \frac{\alpha_{t_i}}{\alpha_{t_{i-1}}}(\mathbf{y}_{t_{i-1}} - \mathbf{x}_{t_{i-1}}) + \Gamma; \Gamma = \Gamma_1 + \Gamma_2$$

762 and:

$$\begin{aligned} \Gamma_1 &= -2\alpha_{t_i} \int_{\lambda_{t_{i-1}}}^{\lambda_{t_i}} e^{-u} [\epsilon(\mathbf{u}_i, s_i) - \epsilon(x_{s_i}, s_i)] du \\ \Gamma_2 &= -2\alpha_{t_i} \int_{\lambda_{t_{i-1}}}^{\lambda_{t_i}} e^{-u} [\epsilon(x_{s_i}, s_i) - \hat{\epsilon}(\hat{\mathbf{x}}_u, u)] du \end{aligned}$$

763 Similarly to the case  $k = 1$ ,  $\mathbb{E}[\|\Gamma_2\|] \leq Ch^2$ . Note that  $\mathbb{E}[\|\Gamma_1\|] \leq Ch\Delta_i$  with  $\Delta_i = \mathbb{E}[\|\mathbf{u}_i - \mathbf{x}_{s_i}\|]$ .

764 Introduce:  $U_i = \mathbb{E}[\|\mathbf{y}_{t_i} - \mathbf{x}_{t_i}\|]$ . We will bound  $\Delta_i$  by a function of  $U_{i-1}$ . For this, recall:

$$\mathbf{u}_i = \frac{\alpha_{s_i}}{\alpha_{t_{i-1}}} \mathbf{y}_{t_{i-1}} - 2\alpha_{s_i} \int_{\lambda_{t_{i-1}}}^{\lambda_{s_i}} e^{-\lambda} \epsilon(\mathbf{y}_{t_{i-1}}, t_{i-1}) d\lambda - \sqrt{2}\alpha_{s_i} \int_{\lambda_{t_{i-1}}}^{\lambda_{s_i}} e^{-\lambda} d\bar{\omega}(\lambda),$$

765 and write the difference:

$$\mathbf{u}_i - \mathbf{x}_{s_i} = \frac{\alpha_{s_i}}{\alpha_{t_{i-1}}}(\mathbf{y}_{t_{i-1}} - \mathbf{x}_{t_{i-1}}) + 2\alpha_{t_i} \int_{\lambda_{t_{i-1}}}^{\lambda_{t_i}} e^{-u} (\hat{\epsilon}(\hat{\mathbf{x}}_u, u) - \epsilon_\theta(\mathbf{y}_{t_{i-1}}, \lambda_{t_{i-1}})) d\lambda.$$

766 By the triangular inequality:

$$|\hat{\epsilon}(\hat{\mathbf{x}}_u, u) - \epsilon(\mathbf{y}_{t_{i-1}}, \lambda_{t_{i-1}})| \leq C(|\mathbf{x}_{t_\lambda(u)} - \mathbf{x}_{t_{i-1}}| + |\mathbf{x}_{t_{i-1}} - \mathbf{y}_{t_{i-1}}| + |t_\lambda(u) - t_{i-1}|),$$

767 and so:  $\mathbb{E}[|\hat{\epsilon}(\hat{\mathbf{x}}_u, u) - \epsilon(\mathbf{y}_{t_{i-1}}, \lambda_{t_{i-1}})|] \leq C(\sqrt{h} + U_{i-1} + h)$ . Finally:

$$\Delta_i \leq \frac{\alpha_{s_i}}{\alpha_{t_{i-1}}} U_{i-1} + Ch \left( \sqrt{h} + U_{i-1} + h \right) \leq U_{i-1} + Ch \left( \sqrt{h} + U_{i-1} \right),$$

768 and  $\mathbb{E}[\|\Gamma_1\|] \leq Ch^{5/2} + C(h + h^2)U_{i-1}$ . This gives the bound:

$$U_i \leq Ch^2 + \left( \frac{\alpha_{t_i}}{\alpha_{t_{i-1}}} + Ch + Ch^2 + Ch^3 \right) U_{i-1}.$$

769 Now using Theorem B.6, the proof can now be finished following as in proof in Section B.2.4.

770

### 771 B.3.2 Convergence of SEEDS-3:

772 Continuing with the same notations as before, we will prove by analogy that:

$$U_i \leq Ch^2 + \left( \frac{\alpha_{t_i}}{\alpha_{t_{i-1}}} + Ch + Ch^2 + Ch^3 \right) U_{i-1}, \quad (49)$$

773 so that, by Theorem B.6, we obtain the desired result.

774 Let  $\mathbf{y}_{t_i} = \tilde{\mathbf{x}}_{t_i}$ . We have:

$$\mathbf{y}_{t_i} = \frac{\alpha_{t_i}}{\alpha_{t_{i-1}}} \mathbf{y}_{t_{i-1}} - 2\alpha_{t_i} \int_{\lambda_{t_{i-1}}}^{\lambda_{t_i}} e^{-\lambda} \epsilon(\mathbf{y}_{t_{i-1}}, t_{i-1}) d\lambda$$

775

$$- \frac{2\alpha_{t_i}}{h_i r_2} \int_{\lambda_{t_{i-1}}}^{\lambda_{t_i}} e^{-\lambda} (\lambda - \lambda_{t_{i-1}}) (\epsilon(u_{2i}, s_{2i}) - \epsilon(\mathbf{y}_{t_{i-1}}, t_{i-1})) d\lambda + \text{Noise},$$

776 and  $x_{t_i} = \frac{\alpha_{t_i}}{\alpha_{t_{i-1}}} x_{t_{i-1}} - 2\alpha_{t_i} \int_{\lambda_{t_{i-1}}}^{\lambda_{t_i}} e^{-\lambda} \hat{\epsilon}(\hat{\mathbf{x}}_\lambda, \lambda) d\lambda + \text{Noise}$ , where Noise is the same in both

777 equations. From the proof for  $k = 1$ , it suffices to bound:

$$\Gamma = \frac{1}{h_i} \int_{\lambda_{t_{i-1}}}^{\lambda_{t_i}} e^{-\lambda} (\lambda - \lambda_{t_{i-1}}) (\epsilon(u_{2i}, s_{2i}) - \epsilon(\mathbf{y}_{t_{i-1}}, t_{i-1})) d\lambda,$$

in the  $L^1$  norm. By the Lipschitz property of  $\epsilon$ :

$$\begin{aligned}\mathbb{E}[|\Gamma|] &\leq Ch(\mathbb{E}[|u_{2i} - x_{s_{2i}}|] + \mathbb{E}[|x_{t_{i-1}} - x_{s_{2i}}|] + \mathbb{E}[|y_{t_{i-1}} - x_{t_{i-1}}|]) + Ch^2 \\ &\leq Ch(\mathbb{E}[|u_{2i} - x_{s_{2i}}|] + \sqrt{h} + U_{i-1}) + Ch^2.\end{aligned}$$

Now, let us bound  $\mathbb{E}[|u_{2i} - x_{s_{2i}}|]$  and for this, write

$$\begin{aligned}u_{2i} &= \frac{\alpha_{s_{2i}}}{\alpha_{t_{i-1}}} y_{t_{i-1}} - 2\alpha_{s_{2i}} \int_{\lambda_{t_{i-1}}}^{\lambda_{s_{2i}}} e^{-\lambda} \epsilon(y_{t_{i-1}}, t_{i-1}) d\lambda \\ &\quad - 2\alpha_{s_{2i}} \int_{\lambda_{t_{i-1}}}^{\lambda_{s_{2i}}} e^{-\lambda} (\lambda - \lambda_{t_{i-1}}) \frac{\epsilon(u_{2i-1}, s_{2i-1}) - \epsilon(y_{t_{i-1}}, t_{i-1})}{r_1 h_i} d\lambda + \text{Noise}\end{aligned}$$

and

$$x_{s_{2i}} = \frac{\alpha_{s_{2i}}}{\alpha_{t_{i-1}}} x_{t_{i-1}} - 2\alpha_{s_{2i}} \int_{\lambda_{t_{i-1}}}^{\lambda_{s_{2i}}} e^{-\lambda} \widehat{\epsilon}(\widehat{\mathbf{x}}_\lambda, \lambda) d\lambda + \text{Noise},$$

where Noise is the same in both equations. So

$$\begin{aligned}u_{2i} - x_{s_{2i}} &= \frac{\alpha_{s_{2i}}}{\alpha_{t_{i-1}}} (y_{t_{i-1}} - x_{t_{i-1}}) - 2\alpha_{s_{2i}} \int_{\lambda_{t_{i-1}}}^{\lambda_{s_{2i}}} e^{-\lambda} (\epsilon(y_{t_{i-1}}, t_{i-1}) - \widehat{\epsilon}(\widehat{\mathbf{x}}_\lambda, \lambda)) d\lambda \\ &\quad - 2\alpha_{s_{2i}} \int_{\lambda_{t_{i-1}}}^{\lambda_{s_{2i}}} e^{-\lambda} (\lambda - \lambda_{t_{i-1}}) D d\lambda,\end{aligned}$$

where  $D = \frac{\epsilon(u_{2i-1}, s_{2i-1}) - \epsilon(y_{t_{i-1}}, t_{i-1})}{r_1 h_i}$ . From the convergence proof of SEEDS-1, and the Lipschitz property of  $\epsilon$ , we obtain:

$$\mathbb{E}[|u_{2i} - x_{s_{2i}}|] \leq U_{i-1} + ChU_{i-1} + Ch^2 + Ch\mathbb{E}[|u_{2i-1} - y_{t_{i-1}}|].$$

Again, by the triangular inequality:

$$\mathbb{E}[|u_{2i-1} - y_{t_{i-1}}|] \leq \mathbb{E}[|u_{2i-1} - x_{s_{2i-1}}|] + C\sqrt{h} + U_{i-1},$$

and since

$$u_{2i-1} - x_{s_{2i-1}} = \frac{\alpha_{s_{2i-1}}}{\alpha_{t_{i-1}}} (y_{t_{i-1}} - x_{t_{i-1}}) - 2\alpha_{s_{2i-1}} \int_{\lambda_{t_{i-1}}}^{\lambda_{s_{2i-1}}} e^{-\lambda} (\widehat{\epsilon}(\widehat{\mathbf{x}}_\lambda, \lambda) - \epsilon(y_{t_{i-1}}, t_{i-1})) d\lambda,$$

we have, as before,

$$\mathbb{E}[|u_{2i-1} - x_{s_{2i-1}}|] \leq U_{i-1} + ChU_{i-1} + Ch^2.$$

Combining the previous inequalities leads to (49). This finishes the proof of Corollary 4.3.

## C Implementation Details

The SEEDS solvers used in our experiments are exactly the variants we described in Algorithms 2, 3, 4 in the main part of the paper. In particular, SEEDS-2 and SEEDS-3 solvers are completely determined by one-parameter families of deterministic exponential integrators from [10] of order 2 and 3 respectively and prescribed by the following Butcher tableaux:

$$\begin{array}{c|c} 0 & 0 \\ c_2 & c_2 \varphi_{1,2} \\ \hline & \left(1 - \frac{1}{2c_2}\right) \varphi_1 \quad \frac{1}{2c_2} \varphi_1 \end{array} \quad \begin{array}{c|cc} 0 & 0 & 0 \\ c_2 & c_2 \varphi_{1,2} & 0 \\ \frac{2}{3} & \frac{2}{3} \varphi_{1,3} - \frac{4}{9c_2} \varphi_{2,3} & \frac{4}{9c_2} \varphi_{2,3} \\ \hline & \varphi_1 - \frac{3}{2} \varphi_2 & 0 \quad \frac{3}{2} \varphi_2 \end{array}$$

In all experiments we fix the parameter  $c_2 = 0.5$  for SEEDS-2 and  $c_2 = \frac{1}{3}$  for SEEDS-3. We point out that the Butcher tableau here associated to SEEDS-3 is the result of a weakening of the *stiff order conditions* so it might suffer from order reduction in the deterministic case. We also point out that a full theory of stiff order conditions for stochastic exponential Runge-Kutta methods for semi-linear DEs with a time-varying linear coefficient have not been yet developed to the authors knowledge. As such, this is only an analogy whose purpose is to clarify how our solvers relate to well-known solvers from the literature, but such Butcher tableaux do not rigorously reflect their convergence order.

## 802 C.1 Stabilization of the exponential terms

803 In the proposed algorithms, one subtle detail is to re-arrange all equations in order for them to make  
 804 use only of the  $\text{expm1}(h)$  function which computes  $e^h - 1$  with great numerical stability, specially  
 805 for small values of  $h$ . We have for values  $r_1 = 1/3$ ,  $r_2 = 2/3$ , the following identity

$$\begin{aligned} \sqrt{e^{2h_i} - e^{h_i} z_i} + \sqrt{e^{h_i} - 1} v_i &= \sqrt{e^{h_i} - 1} \left( \sqrt{e^{h_i} z_i} + v_i \right) \\ &= \sqrt{e^{h_i} - 1} \left( e^{\frac{h_i}{2}} z_i + v_i \right) \\ &= \sqrt{\text{expm1}(h_i)} \left( \left( \text{expm1} \left( \frac{h_i}{2} \right) + 1 \right) z_i + v_i \right) \\ &= \sqrt{\text{expm1}(h_i)} \left( \text{expm1} \left( \frac{h_i}{2} \right) + 1 \right) z_i + \sqrt{\text{expm1}(h_i)} v_i. \end{aligned}$$

806 Now by using

$$e^{2(r_2 - r_1)h_i} = e^{2(\frac{2}{3} - \frac{1}{3})h_i} = e^{\frac{2}{3}h_i} = e^{r_2 h_i},$$

807 we now compute

$$\begin{aligned} \sqrt{e^{2r_2 h_i} - e^{r_2 h_i} z_i^1} + \sqrt{e^{r_2 h_i} - 1} z_i^2 &= \sqrt{e^{r_2 h_i} - 1} \left( \sqrt{e^{r_2 h_i} z_i^1} + z_i^2 \right) \\ &= \sqrt{e^{r_2 h_i} - 1} \left( e^{\frac{r_2 h_i}{2}} z_i^1 + z_i^2 \right) \\ &= \sqrt{\text{expm1}(r_2 h_i)} \left( (\text{expm1}(r_2 h_i) + 1) z_i^1 + z_i^2 \right) \\ \sqrt{e^{2h_i} - e^{2r_2 h_i} z_i^1} &= \sqrt{e^{3r_2 h_i} - e^{2r_2 h_i} z_i^1} \\ &= e^{r_2 h_i} \sqrt{e^{r_2 h_i} - 1} z_i^1 \\ &= \sqrt{\text{expm1}(r_2 h_i)} (\text{expm1}(r_2 h_i) + 1) z_i^1. \end{aligned}$$

808 Finally, we obtain

$$\begin{aligned} &\sqrt{e^{2h_i} - e^{2r_2 h_i} z_i^1} + \sqrt{e^{2r_2 h_i} - e^{r_2 h_i} z_i^2} + \sqrt{e^{r_2 h_i} - 1} z_i^3 \\ &= \sqrt{\text{expm1}(r_2 h_i)} \left( (\text{expm1}(r_2 h_i) + 1) z_i^1 + (\text{expm1}(r_1 h_i) + 1) z_i^2 + z_i^3 \right). \end{aligned}$$

809

## 810 C.2 Noise schedules parameterizations

811 The inverses of  $\lambda(t)$  are given in the (VP) linear and cosine schedules respectively by

$$\begin{aligned} t_\lambda(\lambda) &= \frac{2 \log(e^{-2\lambda} + 1)}{\sqrt{\beta_{\min}^2 + 2(\beta_{\max} - \beta_{\min}) \log(e^{-2\lambda} + 1) + \beta_{\min}}}, \\ t_\lambda(\lambda) &= \frac{2(1+s)}{\pi} \arccos \left( \exp \left( -\frac{1}{2} \log(e^{-2\lambda} + 1) + \log \cos \left( \frac{\pi s}{2(1+s)} \right) \right) \right) - s. \end{aligned}$$

812 In EDM Noise Prediction case, the inverses of  $\lambda(t)$ , as given in [\(37\)](#), with respect to the NPFO and  
 813 NRSDE are respectively given by

$$t_\lambda(\lambda) = \sigma_d \tan(e^{-\lambda}) \quad \text{and} \quad t_\lambda(\lambda) = \frac{\sigma_d}{\sqrt{\frac{1}{\sigma_d^2 e^{-2\lambda}} - 1}}.$$

814

### C.3 EDM discretization

We follow Karras et al. [12] to implement the EDM discretization timesteps  $\{t_i\}_{i=0}^M$  as  $t_i = \sigma^{-1}(\sigma_i)$  such that, for  $\rho > 0$ ,

$$\sigma_{i < M} = \left( \sigma_{\max}^{\frac{1}{\rho}} + \frac{i}{N-1} \left( \sigma_{\min}^{\frac{1}{\rho}} - \sigma_{\max}^{\frac{1}{\rho}} \right) \right)^{\rho} \quad \text{and} \quad \sigma_N = 0.$$

From the definition, we note that  $\sigma_0 = \sigma_{\max}$  and  $\sigma_{M-1} = \sigma_{\min}$ , where  $\sigma_{\min}$  and  $\sigma_{\max}$  denote the minimum and maximum noise magnitude, respectively. We also keep default value  $\rho = 7$  as in [12]. However, we figured out that when using EDM discretization with linear schedule, the noise schedule improvement in iDDPM pre-trained models would result in two consecutive time steps of the same value, i.e.  $t_j = t_{j+1}$  for some index  $j = 1, \dots, M-1$  and large steps ( $M \geq 61$ ). Thus, for

SEEDS-3 and DPM-Solver-3 [15], the usage of the function  $\varphi_2(h) = \frac{e^h - h - 1}{h^2}$  (see Appendix D for more details) will cause zero division error where  $h = \lambda_{t_{j+1}} - \lambda_{t_j} = 0$ . Therefore, in our implementation, we ignore the noise schedule improvement of iDDPM models when using solvers of order three.

### C.4 Final sampling step

The sampling phase in DPMs using SEEDS follows the RSDE, which requires gradual computing through discretization time steps  $\{t_i\}_{i=0}^M$  and the latter goes from  $t_0 = T$  to  $t_M = 0$ . In our implementation, to avoid the logarithm of zero error at the last step, i.e.  $\log \sigma_{t_M} = \log(0)$ , we stop the sampling phase at step  $(M-1)$ . Hence, the NFE used in a run will be given as

$$\text{NFE} = k \times (M-1),$$

where  $k$  represents the order of the solver. We also do not use the “denoising” trick, i.e., ignoring the random noise at the last step and leave it to further research.

## D Reminders on Stochastic Exponential Integrators

Let us consider a SDE of the form

$$d\mathbf{x}(t) = [a(t)\mathbf{x}(t) + c(t)f(\mathbf{x}(t), t)]dt + g(t)d\boldsymbol{\omega}(t), \quad (50)$$

where  $a, c : [0, T] \rightarrow \mathbb{R}$  and  $g : [0, T] \rightarrow \mathbb{R}^{d \times d}$ . In other words we concentrate to high-dimensional semi-linear non autonomous SDEs with additive noise. The objective of this section is to construct explicit stochastic exponential derivative-free methods for the above equation following the Runge-Kutta (RK) approach. These methods ideally should fulfill the following properties:

1. If  $f \equiv 0$ , then (50) can be solved *exactly*;
2. If  $g \equiv 0$ , then a SEEDS method for (50) identifies with an exponential RK (ERK) method;
3. If  $a \equiv 0$ , then a SEEDS method for (50) identifies with a stochastic RK (SRK) method and if moreover  $g \equiv 0$  then it identifies with a classical RK ODE method.

Before tackling the aimed SEEDS problem let us rapidly recall elementary constructions of RK, ERK, weak and strong SRK methods. We will not deal with time-adaptive methods here.

### D.1 Derivative-free exponential ODE schemes

#### D.1.1 Runge-Kutta approach

Derivative-free schemes are obtained by comparing the Itô-Taylor expansion of the above paragraph with expressions of  $\mathbf{x}(t)$  in terms of its intermediate evaluations between  $s$  and  $t = s + h$  and the Taylor expansions of such evaluations. As a simple example, in the ODE regime

$$d\mathbf{x}(t) = f(\mathbf{x}(t), t)dt. \quad (51)$$

853 As such, analytic solutions to the above equations are of the form

$$\mathbf{x}(t) = \mathbf{x}(s) + \int_s^t f(\mathbf{x}(\tau), \tau) d\tau.$$

854 Now, Taylor expansion gives, up to order 2:

$$\begin{aligned} \mathbf{x}(t) &= \mathbf{x}(s) + h\mathbf{x}'(s) + \frac{h^2}{2}\mathbf{x}''(s) + \mathcal{O}(h^3) \\ &= \mathbf{x}(s) + hf(\mathbf{x}(s), s) + \frac{h^2}{2}(\mathbf{x}'(s)\partial_{\mathbf{x}}f(\mathbf{x}(s), s) + \partial_t f(\mathbf{x}(s), s)) + \mathcal{O}(h^3) \\ &= \mathbf{x}(s) + hf(\mathbf{x}(s), s) + \frac{h^2}{2}(f(\mathbf{x}(s), s)\partial_{\mathbf{x}}f(\mathbf{x}(s), s) + \partial_t f(\mathbf{x}(s), s)) + \mathcal{O}(h^3). \end{aligned}$$

855 A straightforward recursion yields a Taylor expansion

$$\mathbf{x}(t) = \mathbf{x}(s) + \sum_{k=1}^n \frac{h^k}{k!} L_t^{k-1} f(\mathbf{x}(t), t) + \int_s^t \cdots \int_s^\tau L_t^n f(\mathbf{x}(\tau), \tau) d\tau^{n+1},$$

856 where we denote the generalized infinitesimal operator of the solution  $\mathbf{x}$  of (51) by

$$L_t(\bullet) = \partial_t(\bullet) + f(\mathbf{x}(t), t) \cdot \partial_{\mathbf{x}}(\bullet).$$

857 Derivative-free methods seek to get rid of the derivatives in  $L_t$  by computing Taylor expansions of  $f$   
858 at well-chosen points. In the explicit one-step case, this amounts of defining

$$\hat{\mathbf{x}}(t) = \hat{\mathbf{x}}(s) + h \sum_{k=1}^n \Phi(\hat{\mathbf{x}}(s), s, h),$$

859 where the  $\Phi$  function does not contain derivatives of  $f$ . The general high order case is given by  
860 well-tuned coefficients in the following scheme

$$\begin{aligned} \hat{\mathbf{x}}(t) &:= \hat{\mathbf{x}}(s) + h \sum_{i=1}^n \alpha_i f(\mathbf{x}_i, s + c_i h) \\ \mathbf{x}_i &= \hat{\mathbf{x}}(s) + h \sum_{j=1}^n a_{i,j} f(\mathbf{x}_j, s + c_j h). \end{aligned}$$

861 By denoting  $\alpha = [\alpha_1 \dots \alpha_n]$ ,  $c = [c_1 \dots c_n]^T$  and  $A = (a_{i,j})$ , these can be represented by a Butcher  
862 tableau of the form

$$\begin{array}{c|c} c & A \\ \hline & \alpha \end{array}$$

863 In the following sections we will present extended version of this tableau for representing more  
864 involved numerical schemes. As such, the Euler, midpoint, Heun and general second order explicit  
865 methods are respectively:

$$\begin{array}{c|c} 0 & 0 \\ \hline & 1 \end{array} \quad \begin{array}{c|cc} 0 & 0 & 0 \\ 1/2 & 1/2 & 0 \\ \hline & 0 & 1 \end{array} \quad \begin{array}{c|cc} 0 & 0 & 0 \\ 1 & 1 & 0 \\ \hline & 1/2 & 1/2 \end{array} \quad \begin{array}{c|cc} 0 & 0 & 0 \\ c_2 & c_2 & 0 \\ \hline & 1 - \frac{1}{2c_2} & \frac{1}{2c_2} \end{array}$$

866

## 867 D.1.2 Exponential Runge-Kutta approach

868 We now concentrate on a non-autonomous semi-linear ODE of the form

$$d\mathbf{x}(t) = [f(t)\mathbf{x}(t) + g(\mathbf{x}(t), t)]dt, \quad (52)$$

869 where  $f(t) = \bar{f}(t) \cdot \text{Id}_d$  and  $g(\mathbf{x}(t), t) = \bar{g}(\mathbf{x}(t), t) \cdot \text{Id}_d$  are diagonal time-dependent matrices with  
870 identical diagonal coefficients. In particular, we have  $[f^{(k)}(t), f^{(l)}(s)] = 0$ , a property we will need  
871 to facilitate exponential matrix multiplications. As  $f(s)$  is a  $d$ -dimensional diagonal matrix, the

872 fundamental matrix for (52), usually given by the Peano-Baker series, simplifies in this case to the  
873 form

$$\Phi(t; s) := e^{\int_s^t f(r)dr} = \sum_{n=0}^{\infty} \frac{1}{n!} \left( \int_s^t f(r)dr \right)^n,$$

874 which satisfies  $\Phi'(t; s) = f(t)\Phi(t; s)$  and  $\Phi(s; s) = 1$ . Then the exact solution for (52) is given, via  
875 the variation of constants formula, by

$$\mathbf{x}(t) = \Phi(t; s) \left( \mathbf{x}(s) + \int_s^t \Phi^{-1}(\tau; s)g(\mathbf{x}(\tau), \tau)d\tau \right) = \Phi(t; s)\mathbf{x}(s) + \int_s^t \Phi(t; \tau)g(\mathbf{x}(\tau), \tau)d\tau.$$

876 In light of this integral form, one can formalize a general class of  
877 exponential  $n$ -stage RK methods

$$\begin{aligned} \mathbf{x}_i &= \gamma_i(h, f_s)\mathbf{x}(s) + \sum_{j=1}^n a_{ij}(h, f_s)g(\mathbf{x}_j, s + c_jh) \\ \mathbf{x}(t) &= \gamma_0(h, f_s)\mathbf{x}(s) + \sum_{i=1}^n b_i(h, f_s)g(\mathbf{x}_i, s + c_ih), \end{aligned}$$

878 where  $\gamma_0, \gamma_i, a_{ij}, b_j$  are functions of the step-size  $h$ ,  $f$  and  $f_s(r) := \int_0^r f(s + \tau)d\tau$ . There are two  
879 possible approaches to create exponential integrators, namely the exponential time-differencing  
880 (ETD) approach that uses the variation of constants formula and makes use of the  $\varphi$  functions, and  
881 the Lawson approach, also known as integrating factor (IF), which makes a change of variables on the  
882 above SDE thus avoiding the use of the  $\varphi$  functions but computing exponential factors step-wise.

### 883 The Lawson and the ETD approaches for Exponential Euler schemes

884 There are two choices one can make when computing first order approximations of

$$\mathbf{x}(t) = \Phi(t; s)\mathbf{x}(s) + \int_s^t \Phi(t; \tau)g(\mathbf{x}(\tau), \tau)d\tau.$$

885 First, by interpolating  $g(\mathbf{x}(\tau), \tau)$  as  $g(\mathbf{x}(s), s)$  we obtain

$$\mathbf{x}(t) = \Phi(t; s)\mathbf{x}(s) + g(\mathbf{x}(s), s) \int_s^t \Phi(t; \tau)d\tau.$$

886 Now two choices remain. Either  $\int_s^t \Phi(t; \tau)d\tau$  is computed exactly or we again interpolate  $\Phi(t; \tau)$  as  
887  $\Phi(t; s)$ . Taking for simplicity  $f \equiv A$  to be constant and by denoting  $h = t - s$ , the first case yields  
888 the ETD Euler method

$$\begin{aligned} \hat{\mathbf{x}}(t) &= \Phi(t; s)\hat{\mathbf{x}}(s) + h\gamma_1(f, t, s)g(\hat{\mathbf{x}}(s), s) \\ &= e^{Ah}\hat{\mathbf{x}}(s) + h\varphi_1(Ah)g(\hat{\mathbf{x}}(s), s) \\ &= \hat{\mathbf{x}}(s) + h\varphi_1(Ah)[g(\hat{\mathbf{x}}(s), s) - \hat{\mathbf{x}}(s)], \end{aligned}$$

889 and the second yields the IF Euler (also called Lawson-Euler) method

$$\begin{aligned} \hat{\mathbf{x}}(t) &= \Phi(t; s)\hat{\mathbf{x}}(s) + h\Phi(t; s)g(\hat{\mathbf{x}}(s), s) \\ &= e^{Ah}(\hat{\mathbf{x}}(s) + hg(\hat{\mathbf{x}}(s), s)). \end{aligned}$$

890 Now, consider a solution

$$\mathbf{x}(t) = \Phi(t; s)\mathbf{x}(s) + \int_0^h \Phi(h; \tau)g(\mathbf{x}(s + \tau), s + \tau)d\tau.$$

891 Exponential methods then aim to approximate the term  $g(\mathbf{x}(s + \tau), s + \tau)$  by its interpolation  
892 polynomial in certain non-confluent quadrature nodes  $c_1, \dots, c_n$ .

### 893 The ETD approach

894 In this case, the variation of constants formula yields

$$\begin{aligned}\mathbf{x}(s + ch) &= e^{\int_s^{s+ch} a(\tau) d\tau} \mathbf{x}(s) + \int_s^{s+ch} e^{\int_\tau^{s+ch} a(r) dr} f(\mathbf{x}(\tau), \tau) d\tau. \\ &= e^{\int_0^{ch} a(s+\tau) d\tau} \mathbf{x}(t) + \int_0^{ch} e^{\int_{\tau-s}^{ch} a(s+r) dr} f(\mathbf{x}(s + \tau), s + \tau) d\tau.\end{aligned}$$

895 Now, as before, the Taylor expansion of  $f$  yields

$$\begin{aligned}f(\mathbf{x}(s + \tau), s + \tau) &= \sum_{j=1}^q \frac{\tau^{j-1}}{(j-1)!} f^{(j-1)}(\mathbf{x}(s), s) \\ &\quad + \int_0^\tau \frac{(\tau - \tau_1)^{q-1}}{(q-1)!} f^{(q)}(\mathbf{x}(s + \tau_1), s + \tau_1) d\tau_1.\end{aligned}$$

896 Recall that the  $\varphi$  functions are given in an integral form as follows

$$\varphi_{k+1}(t) = \int_0^1 e^{(1-\delta)t} \frac{\delta^k}{k!} d\delta,$$

897 which satisfy  $\varphi_k(0) = \frac{1}{k!}$ . Now denote

$$\begin{aligned}\varphi_j(t, a) &:= \frac{1}{t^j} \int_0^t e^{\int_\tau^t a(r) dr} \frac{\tau^{j-1}}{(j-1)!} d\tau, \quad j \geq 1. \\ \varphi_1(h, a) &= \frac{1}{h} \int_0^h e^{\int_\tau^h a(r) dr} d\tau = \int_0^1 e^{h \int_\theta^1 a(r) dr} d\theta.\end{aligned}$$

898 The exact solution at  $s + ch$  now reads

$$\begin{aligned}\mathbf{x}(s + ch) &= e^{\int_0^{ch} a(s+\tau) d\tau} \mathbf{x}(s) + \sum_{j=1}^q (ch)^j \varphi_j(ch, a) f^{(j-1)}(\mathbf{x}(s), s) \\ &\quad + \int_0^{ch} e^{\int_\tau^{ch} a(s+r) dr} \left( \int_0^\tau \frac{(\tau - \tau_1)^{q-1}}{(q-1)!} f^{(q)}(\mathbf{x}(s + \tau_1), s + \tau_1) d\tau_1 \right) d\tau.\end{aligned}$$

899 Using the left endpoint rule yields

$$\begin{aligned}\mathbf{x}(t) &= e^{\int_0^h a(s+\tau) d\tau} \mathbf{x}(s) + f(\mathbf{x}(s), s) \int_0^h e^{\int_\tau^h a(s+r) dr} d\tau + \mathcal{O}(h^2) \\ &= e^{\int_0^h a(s+\tau) d\tau} \mathbf{x}(s) + h\varphi_1(h, a) f(\mathbf{x}(s), s) + \mathcal{O}(h^2).\end{aligned}$$

900 **Second order examples:**

901 The condition  $b_2(z)c_2 = \varphi_2(z)$  implies  $b_2 = \varphi_2(z)/c_2$  and we obtain

$$\begin{aligned}\widehat{\mathbf{x}} &= e^{chA} \mathbf{x}(s) + ch\varphi_1(chA) f(\mathbf{x}(s), s) \\ \mathbf{x}(t) &= e^{hA} \mathbf{x}(s) + h \left( \varphi_1(hA) - \frac{1}{c} \varphi_2(hA) \right) f(\mathbf{x}(s), s) + \frac{h}{c} \varphi_2(hA) f(\widehat{\mathbf{x}}, s + ch).\end{aligned} \quad (53)$$

902 A second method is obtained by weakening the above condition to  $b_2(0)c_2 = \varphi_2(0) = 1/2$  giving

$$\begin{aligned}\widehat{\mathbf{x}} &= e^{chA} \mathbf{x}(s) + ch\varphi_1(chA) f(\mathbf{x}(s), s) \\ \mathbf{x}(t) &= e^{hA} \mathbf{x}(s) + h\varphi_1(hA) \left( 1 - \frac{1}{2c} \right) f(\mathbf{x}(s), s) + \frac{h}{2c} \varphi_1(hA) f(\widehat{\mathbf{x}}, s + ch).\end{aligned} \quad (54)$$

903 In some cases this method can suffer from order reduction and not reach order 2 of convergence.

904 Moreover, setting  $c = 1/2$  gives the exponential midpoint method:

$$\begin{aligned}\widehat{\mathbf{x}} &= e^{chA} \mathbf{x}(s) + ch\varphi_1(chA) f(\mathbf{x}(s), s) \\ \mathbf{x}(t) &= e^{hA} \mathbf{x}(s) + h\varphi_1(hA) f(\widehat{\mathbf{x}}, s + ch).\end{aligned} \quad (55)$$

905 The above order 1 and 2 exponential methods are represented by the following *exponential* Butcher  
906 tableaux

$$\begin{array}{c|c} 0 & 0 \\ \hline & \varphi_1 \end{array} \quad \begin{array}{c|cc} 0 & c_2\varphi_{1,2} & \\ \hline & \varphi_1 - \frac{1}{c_2}\varphi_2 & \frac{1}{c_2}\varphi_2 \end{array} \quad \begin{array}{c|cc} 0 & c_2\varphi_{1,2} & \\ \hline & \left(1 - \frac{1}{2c_2}\right)\varphi_1 & \frac{1}{2c_2}\varphi_1 \end{array} \quad \begin{array}{c|cc} 0 & c_2\varphi_{1,2} & \\ \hline & 0 & \varphi_1 \end{array}$$

907 We check that when formally setting  $A = 0$  then the first two methods are identical and give the  
908 generic 2nd order RK method, the choice  $c = 1$  gives the Heun method and the choice  $c = 1/2$  gives  
909 the midpoint method.

#### 910 Fourth order methods

911 It can be shown that ERK methods need at least 5 stages to achieve order 4. By setting formally  
912  $A = 0$  these methods do not have a non-exponential counterpart to our knowledge.

913 **5-stage sequential** We have a fourth-order ERK scheme given by

$$\begin{array}{c|cccccc} 0 & & & & & & \\ \frac{1}{2} & \frac{1}{2}\varphi_{1,2} & & & & & \\ \frac{1}{2} & \frac{1}{2}\varphi_{1,3} - \varphi_{2,3} & \varphi_{2,3} & & & & \\ 1 & \varphi_{1,4} - 2\varphi_{2,4} & \varphi_{2,4} & \varphi_{2,4} & & & \\ \frac{1}{2} & \frac{1}{2}\varphi_{1,5} - 2a_{5,2} - a_{5,4} & a_{5,2} & a_{5,2} & \frac{1}{4}\varphi_{2,5} - a_{5,2} & & \\ \hline & \varphi_1 - 3\varphi_2 + 4\varphi_3 & 0 & 0 & -\varphi_2 + 4\varphi_3 & 4\varphi_2 - 8\varphi_3 & \end{array}$$

914 with

$$a_{5,2} = c_5\varphi_{2,5} - \varphi_{3,4} + c_5^2\varphi_{2,4} - c_5\varphi_{3,5}.$$

915 This can also be represented by Rosenbrock-like Butcher tableau

$$\begin{array}{c|cccccc} 0 & & & & & & \\ \frac{1}{2} & \frac{1}{2}\varphi_{1,2} & & & & & \\ \frac{1}{2} & \frac{1}{2}\varphi_{1,3} & \varphi_{2,3} & & & & \\ 1 & \varphi_1 & \varphi_2 & \varphi_2 & & & \\ \frac{1}{2} & \frac{1}{2}\varphi_{1,5} & a_{5,2} & a_{5,2} & \frac{1}{4}\varphi_{2,5} - a_{5,2} & & \\ \hline & \varphi_1 & 0 & 0 & 4\varphi_3 - \varphi_2 & 4\varphi_2 - 8\varphi_3 & \end{array}$$

916 with

$$a_{5,2} = c_5\varphi_{2,5} - c_3\varphi_{3,3} + c_5^2\varphi_2 - \varphi_3.$$

917 This traduces into (recall that  $D_i = f(\mathbf{x}_i, s + c_i h) - f(\mathbf{x}(s), s)$ )

$$\begin{aligned} \mathbf{x}(t) &= \mathbf{x}(s) + h(\varphi_1(hA))F(\mathbf{x}(s), s) + h(4\varphi_3(hA) - \varphi_2(hA))D_4 \\ &\quad + h(4\varphi_2(hA) - 8\varphi_3(hA))D_5 \\ \mathbf{x}_2 &= \mathbf{x}(s) + c_2 h \varphi_1(c_2 h A) F(\mathbf{x}(s), s) \\ \mathbf{x}_3 &= \mathbf{x}(s) + h c_3 \varphi_1(c_3 h A) F(\mathbf{x}(s), s) + h \varphi_2(c_3 h A) D_2 \\ \mathbf{x}_4 &= \mathbf{x}(s) + h \varphi_1(h A) F(\mathbf{x}(s), s) + h \varphi_2(h A) (D_2 + D_3) \\ \mathbf{x}_5 &= \mathbf{x}(s) + h \varphi_1(h A) F(\mathbf{x}(s), s) + h a_{5,2}(h A) (D_2 + D_3) + h (c_5^2 \varphi_2(c_5 h A) - a_{5,2}(h A)) D_4. \end{aligned}$$

918 Inspired by this, we deduce the following fourth order Algorithm [5](#) specialized for DPMs in the VP  
919 noise prediction regime. We highlight the fact that SEEDS can produce any deterministic exponential  
920 method as in the DPM-Solver approach via the specification of a Butcher tableau this way and most  
921 of all follow-ups which have been done in [\[16\]](#) can readily be applied for SEEDS such as parallel  
922 steps schemes and dynamic thresholding. We leave these directions for future work.

923

## 924 D.2 Derivative-free exponential SDE schemes

925 Let  $\mathbf{x}_t$  be the path at the continuous limit  $h \rightarrow 0$ , and  $\{\hat{\mathbf{x}}_t\}_{t_0}^{t_M}$  be the discretized numerical path,  
926 computed by a numerical scheme  $\mathcal{S}$  with  $M = 1/h$  steps of length  $h > 0$ . Then,  $\mathcal{S}$  has

927 1. *strong order of convergence*  $\gamma$  if there is  $K > 0$  such that

$$\mathbb{E}[\|\mathbf{x}_{t_M} - \hat{\mathbf{x}}_{t_M}\|] \leq K h^\gamma, \quad (56)$$



---

**Algorithm 5** DPM-Solver-4

---

```
1: def DPM-Solver-4( $\epsilon_\theta, \tilde{\mathbf{x}}_{t_{i-1}}, t_{i-1}, t_i, r = 0.5$ ):
2:    $h_i \leftarrow \lambda_{t_i} - \lambda_{t_{i-1}}$ 
3:    $s_2 \leftarrow t_\lambda(\lambda_{t_{i-1}} + rh_i), \quad s_3 \leftarrow t_\lambda(\lambda_{t_{i-1}} + rh_i)$ 
4:    $s_4 \leftarrow t_\lambda(\lambda_{t_{i-1}} + h_i), \quad s_5 \leftarrow t_\lambda(\lambda_{t_{i-1}} + rh_i)$ 
5:    $\mathbf{k}_1 \leftarrow \epsilon_\theta(\tilde{\mathbf{x}}_{t_{i-1}}, t_{i-1})$ 
6:    $\mathbf{k}_2 \leftarrow \frac{\alpha_{s_2}}{\alpha_s} \tilde{\mathbf{x}}_{t_{i-1}} - \sigma_{s_2}(e^{rh} - 1)\mathbf{k}_1$ 
7:    $\mathbf{k}_3 \leftarrow \frac{\alpha_{s_3}}{\alpha_s} \tilde{\mathbf{x}}_{t_{i-1}} - \sigma_{s_3}(e^{rh} - 1)\mathbf{k}_1 - \sigma_{s_3} \left( 4 \frac{e^{rh} - 1}{h} - 2 \right) [\epsilon_\theta(\mathbf{k}_2, s_2) - \mathbf{k}_1]$ 
8:    $\mathbf{k}_4 \leftarrow \frac{\alpha_{s_4}}{\alpha_s} \tilde{\mathbf{x}}_{t_{i-1}} - \sigma_{s_4}(e^h - 1)\mathbf{k}_1 - \sigma_{s_4} \left( \frac{e^h - 1}{h} - 1 \right) [\epsilon_\theta(\mathbf{k}_3, s_3) + \epsilon_\theta(\mathbf{k}_2, s_2) - 2\mathbf{k}_1]$ 
9:    $A = \sigma_{s_5}(e^{rh} - 1)\mathbf{k}_1 - \frac{1}{4}\sigma_{s_5} \left( \frac{e^h - 1}{h} - 1 \right) [\mathbf{k}_1 + \epsilon_\theta(\mathbf{k}_2, s_2) + \epsilon_\theta(\mathbf{k}_3, s_3)]$ 
10:   $B = \sigma_{s_5} \left( \frac{e^{rh} - 1}{h} - \frac{1}{2} \right) [\mathbf{k}_1 + 4\epsilon_\theta(\mathbf{k}_2, s_2) + 4\epsilon_\theta(\mathbf{k}_3, s_3) - \epsilon_\theta(\mathbf{k}_4, s_4)]$ 
11:   $C = \sigma_{s_5} \left( \frac{e^h - 1 + 4(e^{rh} - 1) - 3h}{h^2} - 1 \right) [-\mathbf{k}_1 - \epsilon_\theta(\mathbf{k}_2, s_2) - \epsilon_\theta(\mathbf{k}_3, s_3) + \epsilon_\theta(\mathbf{k}_4, s_4)]$ 
12:   $\mathbf{k}_5 \leftarrow \frac{\alpha_{s_5}}{\alpha_{t_{i-1}}} \tilde{\mathbf{x}}_{t_{i-1}} - A - B - C$ 
13:   $D = \sigma_t(e^h - 1)\mathbf{k}_1 - \sigma_t \left( \frac{e^h - 1}{h} - 1 \right) [4\epsilon_\theta(\mathbf{k}_5, s_5) - \epsilon_\theta(\mathbf{k}_4, s_4) - 3\mathbf{k}_1]$ 
14:   $E = \sigma_t \left( 4 \frac{e^h - 1 - h}{h^2} - 2 \right) [\mathbf{k}_1 + \epsilon_\theta(\mathbf{k}_4, s_4) - 2\epsilon_\theta(\mathbf{k}_5, s_5)]$ 
15:   $\tilde{\mathbf{x}}_{t_i} \leftarrow \frac{\alpha_{t_i}}{\alpha_{t_{i-1}}} \tilde{\mathbf{x}}_{t_{i-1}} - D - E$ 
16:  Return  $\mathbf{x}_{t_i}$ 
```

---

928 2. weak order of convergence  $\beta$  if there is  $K > 0$  and a function class  $\mathcal{K}$  such that

$$|\mathbb{E}[\phi(\mathbf{x}_{t_M})] - \mathbb{E}[\phi(\tilde{\mathbf{x}}_{t_M})]| \leq Kh^\beta, \quad \forall \phi(\cdot) \in \mathcal{K}. \quad (57)$$

929 Strong convergence is concerned with the precision of the path, while the weak convergence is  
930 with the precision of the moments. As, for diffusion models, the center of attention is the evolution  
931 of the probability densities rather than that of the noising process of single data samples, weak  
932 convergence is enough to guarantee the well-conditioning of our numerical schemes. Moreover,  
933 when the diffusion coefficient vanishes, then both strong and weak convergence (with the choice  
934  $\phi = \text{id}$ ) reduce to the usual deterministic convergence criterion for ODEs.

935

### 936 D.2.1 Strong and Weak Stochastic Runge-Kutta approach

937 In all what follows  $\omega$  is considered a  $d$ -dimensional Wiener process (with identity diffusion matrix).

938 Consider the following SDE

$$d\mathbf{x}(t) = f(\mathbf{x}(t), t)dt + g(t)d\omega(t),$$

939 where  $g(t) = \hat{g}(t) \cdot \text{Id}_d$  is considered here as a diagonal matrix with identical diagonal entries  $\hat{g}(t)$ .  
940 Given an initial value independent of  $\omega$ , the integral form of  $\mathbf{x}(t)$  is given by

$$\mathbf{x}(t) = \mathbf{x}(s) + \int_s^t f(\mathbf{x}(\tau), \tau)d\tau + \int_s^t g(\tau)d\omega(\tau).$$

941 The idea underlying stochastic numerical schemes is very similar to the one used in the deterministic  
942 approach, that is to take expansions of the terms inside the integrals based at the integral's initial value  
943 and replace the obtained derivatives that appear by interpolated approximations. A key difference  
944 here is that as we have to consider Itô-Taylor expansions, the infinitesimal operators are different  
945 but most importantly most of the stochastic iterated integrals will need to be approximated in an  
946 appropriate sense, whenever that is possible. We will develop this expansion up to triple integrals.

947

## 948 D.2.2 Truncated Itô-Taylor expansions

949 Applying Itô formula to  $h = f$  or  $g$  yields

$$\begin{aligned} h(\mathbf{x}(t), t) &= h(\mathbf{x}(s), s) + \int_s^t g(\tau) \cdot \partial_{\mathbf{x}} h(\mathbf{x}(\tau), \tau) d\omega(\tau) \\ &\quad + \int_s^t \left( \partial_t h(\mathbf{x}(\tau), \tau) + f(\mathbf{x}(\tau), \tau) \cdot \partial_{\mathbf{x}} h(\mathbf{x}(\tau), \tau) + \frac{g^2(\tau)}{2} \partial_{\mathbf{x}^2}^2 h(\mathbf{x}(\tau), \tau) \right) d\tau. \end{aligned}$$

950 This allows us to define two differential operators  $L, G$  as

$$L_t = \partial_t + f(\mathbf{x}(t), t) \cdot \partial_{\mathbf{x}} + \frac{g^2(t)}{2} \cdot \partial_{\mathbf{x}^2}^2 \quad (58)$$

$$G_t = g(t) \cdot \partial_{\mathbf{x}}. \quad (59)$$

951 In particular  $L_t g(t) = \partial_t g(t)$  and  $G_t g(t) = 0$ . With this notation, we have

$$h(\mathbf{x}(t), t) = h(\mathbf{x}(s), s) + \int_s^t L_t h(\mathbf{x}(\tau), \tau) d\tau + \int_s^t G_t h(\mathbf{x}(\tau), \tau) d\omega(\tau),$$

952 so our solution reads

$$\begin{aligned} \mathbf{x}(t) &= \mathbf{x}(s) + \int_s^t f(\mathbf{x}(\tau_1), \tau_1) d\tau_1 + \int_s^t g(\tau_1) d\omega(\tau_1) \\ &= \mathbf{x}(s) + \int_s^t \left( f(\mathbf{x}(\tau_1), \tau_1) + \int_s^{\tau_1} L_t f(\mathbf{x}(\tau_2), \tau_2) d\tau_2 + \int_s^{\tau_1} G_t f(\mathbf{x}(\tau_2), \tau_2) d\omega(\tau_2) \right) d\tau_1 \\ &\quad + \int_s^t \left( g(\tau_1) + \int_s^{\tau_1} L_t g(\tau_2) d\tau_2 + \int_s^{\tau_1} G_t g(\tau_2) d\omega(\tau_2) \right) d\omega(\tau_1) \\ &= \mathbf{x}(s) + f(\mathbf{x}(s), s)h + g(s)(\omega(t) - \omega(s)) + R_1. \end{aligned}$$

953 Now  $G_t g(\tau_2) = 0$  and

$$g(s) + \int_s^{\tau_1} L_t g(\tau_2) d\tau_2 = g(s) + \int_s^{\tau_1} \partial_t g(\tau_2) d\tau_2 = g(s) + g(\tau_1) - g(s) = g(\tau_1).$$

954 So we have

$$\int_s^t \left( g(s) + \int_s^{\tau_1} L_t g(\tau_2) d\tau_2 + \int_s^{\tau_1} G_t g(\tau_2) d\omega(\tau_2) \right) d\omega(\tau_1) = g(s)(\omega(t) - \omega(s)),$$

955 and now our solution reads

$$\mathbf{x}(t) = \mathbf{x}(s) + f(\mathbf{x}(s), s)h + g(s)(\omega(t) - \omega(s)) + R_1,$$

956 where

$$R_1 = \int_s^t \int_s^{\tau_1} L_t f(\mathbf{x}(\tau_2), \tau_2) d\tau_2 d\tau_1 + \int_s^t \int_s^{\tau_1} G_t f(\mathbf{x}(\tau_2), \tau_2) d\omega(\tau_2) d\tau_1.$$

957 Now we have

$$\begin{aligned} &L_t f(\mathbf{x}(t), t) \\ &= L_t f(\mathbf{x}(s), s) + \int_s^t g(\mathbf{x}(\tau), \tau) \cdot \partial_{\mathbf{x}} L_t f(\mathbf{x}(\tau), \tau) d\omega(\tau) \\ &\quad + \int_s^t \left( \partial_t L_t f(\mathbf{x}(\tau), \tau) + f(\mathbf{x}(\tau), \tau) \cdot \partial_{\mathbf{x}} L_t f(\mathbf{x}(\tau), \tau) + \frac{g^2(\mathbf{x}(\tau), \tau)}{2} \partial_{\mathbf{x}^2}^2 L_t f(\mathbf{x}(\tau), \tau) \right) d\tau \\ &= L_t f(\mathbf{x}(s), s) + \int_s^t L_t^2 f(\mathbf{x}(\tau), \tau) d\tau + \int_s^t G_t L_t f(\mathbf{x}(\tau), \tau) d\omega(\tau), \end{aligned}$$

958 and

$$\begin{aligned}
& G_t f(\mathbf{x}(t), t) \\
&= G_t f(\mathbf{x}(s), s) + \int_s^t g(\mathbf{x}(\tau), \tau) \cdot \partial_{\mathbf{x}} G_t f(\mathbf{x}(\tau), \tau) d\omega(\tau) \\
&\quad + \int_s^t \left( \partial_t G_t f(\mathbf{x}(\tau), \tau) + f(\mathbf{x}(\tau), \tau) \cdot \partial_{\mathbf{x}} G_t f(\mathbf{x}(\tau), \tau) + \frac{g^2(\mathbf{x}(\tau), \tau)}{2} \partial_{\mathbf{x}^2}^2 G_t f(\mathbf{x}(\tau), \tau) \right) d\tau \\
&= G_t f(\mathbf{x}(s), s) + \int_s^t L_t G_t f(\mathbf{x}(\tau), \tau) d\tau + \int_s^t G_t^2 f(\mathbf{x}(\tau), \tau) d\omega(\tau).
\end{aligned}$$

959 Now, if we denote  $d\omega^0(\tau) = d\tau$ ,  $d\omega^1(\tau) = d\omega(\tau)$  and

$$I_{(i)} = \int_s^t d\omega^i(\tau_1) \quad I_{(i,j)} = \int_s^t \int_s^{\tau_1} d\omega^j(\tau_2) d\omega^i(\tau_1) \quad i, j \in \{0, 1\},$$

960 applying the same procedure to  $R_1$  leads to

$$\begin{aligned}
& R_1 \\
&= \int_s^t \int_s^{\tau_1} L_t f(\mathbf{x}(\tau_2), \tau_2) d\tau_2 d\tau_1 + \int_s^t \int_s^{\tau_1} G_t f(\mathbf{x}(\tau_2), \tau_2) d\omega(\tau_2) d\tau_1 \\
&= \int_s^t \int_s^{\tau_1} \left[ L_t f(\mathbf{x}(t), t) + \int_s^{\tau_2} L_t^2 f(\mathbf{x}(\tau_3), \tau_3) d\tau_3 + \int_s^{\tau_2} G_t L_t f(\mathbf{x}(\tau_3), \tau_3) d\omega(\tau_3) \right] d\tau_2 d\tau_1 \\
&\quad + \int_s^t \int_s^{\tau_1} \left[ G_t f(\mathbf{x}(t), t) + \int_s^{\tau_2} L_t G_t f(\mathbf{x}(\tau_3), \tau_3) d\tau + \int_s^{\tau_2} G_t^2 f(\mathbf{x}(\tau_3), \tau_3) d\omega(\tau_3) \right] d\omega(\tau_2) d\tau_1 \\
&= L_t f(\mathbf{x}(t), t) \int_s^t \int_s^{\tau_1} d\tau_2 d\tau_1 + G_t f(\mathbf{x}(t), t) \int_s^t \int_s^{\tau_1} d\omega(\tau_2) d\tau_1 \\
&\quad + \int_s^t \int_s^{\tau_1} \int_s^{\tau_2} L_t^2 f(\mathbf{x}(\tau_3), \tau_3) d\tau_3 d\tau_2 d\tau_1 + \int_s^t \int_s^{\tau_1} \int_s^{\tau_2} G_t L_t f(\mathbf{x}(\tau_3), \tau_3) d\omega(\tau_3) d\tau_2 d\tau_1 \\
&\quad + \int_s^t \int_s^{\tau_1} \int_s^{\tau_2} L_t G_t f(\mathbf{x}(\tau_3), \tau_3) d\tau_3 d\omega(\tau_2) d\tau_1 \\
&\quad + \int_s^t \int_s^{\tau_1} \int_s^{\tau_2} G_t^2 f(\mathbf{x}(\tau_3), \tau_3) d\omega(\tau_3) d\omega(\tau_2) d\tau_1 \\
&= L_t f(\mathbf{x}(s), s) I_{(0,0)} + G_t f(\mathbf{x}(s), s) I_{(0,1)} + L_t^2 f(\mathbf{x}(s), s) I_{(0,0,0)} + G_t L_t f(\mathbf{x}(s), s) I_{(0,0,1)} \\
&\quad + L_t G_t f(\mathbf{x}(s), s) I_{(0,1,0)} + G_t^2 f(\mathbf{x}(s), s) I_{(1,1,0)} + R_2,
\end{aligned}$$

961 and with  $R_2$  consisting on quadruple integrals. As such, our solution now reads

$$\begin{aligned}
\mathbf{x}(t) &= \mathbf{x}(s) + f(\mathbf{x}(s), s)h + g(s)(\omega(t) - \omega(s)) + L_t f(\mathbf{x}(s), s) I_{(0,0)} + G_t f(\mathbf{x}(s), s) I_{(0,1)} \\
&\quad + L_t^2 f(\mathbf{x}(s), s) I_{(0,0,0)} + G_t L_t f(\mathbf{x}(s), s) I_{(0,0,1)} \\
&\quad + L_t G_t f(\mathbf{x}(s), s) I_{(0,1,0)} + G_t^2 f(\mathbf{x}(s), s) I_{(1,1,0)} + R_2.
\end{aligned}$$

962 Now, in the SDE regime, one cannot get rid of the iterated Itô integral and so stochastic RK methods  
963 cannot be derived as simple extensions of their deterministic counterparts. In order to continue we  
964 now take into account the fact that the diffusion SDE has additive and diagonal noise. In this case,  
965 both the Itô and the Stratonovich SDE coincide.

#### 966 Iterated integrals

967 Now, for simplicity, set  $t = 0$ . We then have  $I_{(0)} = h$ ,  $I_{(0,0)} = \int_0^h \int_0^{\tau_1} d\tau_2 d\tau_1 = \frac{h^2}{2}$ ,  $I_{(0,0,0)} = \frac{h^3}{6}$ .  
968 Now notice that

$$\begin{aligned}
I_{(1)} &:= \hat{w}_h \sim \mathcal{N}(0, h) \\
I_{(0,1)} &:= \hat{z}_h := \int_0^h \int_0^{\tau_1} d\omega(\tau_2) d\tau_1 = \lim_{n \rightarrow \infty} \frac{h}{n} \sum_{i=0}^{n-1} \sum_{j=1}^i \epsilon_j, \quad \epsilon_j \sim \mathcal{N}\left(0, \frac{h}{n}\right).
\end{aligned}$$

969 Additionally,  $\hat{w}_h$  and  $\hat{z}_h$  satisfy  $\mathbb{E}[\hat{w}_h^2] = h$ ,

$$\begin{aligned}\mathbb{E}[(\hat{w}_h h - \hat{z}_h)^2] &= \mathbb{E}\left[\left(\int_0^h \tau d\omega(\tau)\right)^2\right] = \frac{1}{3}h^3 \\ \mathbb{E}[\hat{w}_h \hat{z}_h] &= \mathbb{E}\left[\hat{w}_h \int_0^h \tau d\omega(\tau)\right] = \mathbb{E}\left[\int_0^h \tau d\tau\right] = \frac{1}{2}h^2 \\ \mathbb{E}[\hat{z}_h^2] &= \mathbb{E}[(\hat{w}_h h - \hat{z}_h)^2 - h^2 \hat{w}_h^2 + 2h \hat{w}_h \hat{z}_h] = \frac{1}{3}h^3.\end{aligned}$$

970

### 971 **D.2.3 Integral approximations**

#### 972 **Weak Approximations**

973 When crafting weak stochastic approximations to SDEs one may replace multiple Itô integrals by  
974 other random variables satisfying the corresponding moment conditions. We will denote  $\hat{I}_\alpha$  the  
975 approximation of  $I_\alpha$  for  $\alpha$  a multi-index following [13 Corollary 5.12.1]. Of course, the deterministic  
976 integrals  $I_{(0,\dots,0)}$  need not to be approximated.

#### 977 **First order approximations**

978 The random variable  $\hat{I}_{(1)}$  must satisfy for some constant  $K$ :

$$|\mathbb{E}[\hat{I}_{(1)}]| + |\mathbb{E}[(\hat{I}_{(1)})^3]| + |\mathbb{E}[(\hat{I}_{(1)})^2 - h]| \leq Kh^2$$

979 Two possible choices for  $\hat{I}_{(1)}$  are either  $\hat{I}_{(1)} \sim \mathcal{N}(0, h)$  or  $\hat{I}_{(1)}$  is a two-pointed distributed discrete  
980 random variable with

$$\mathbb{P}[\hat{I}_{(1)} = \pm\sqrt{h}] = \frac{1}{2}.$$

#### 981 **Second order approximations**

982 The random variable  $\hat{I}_{(1)}$  must satisfy for some constant  $K$ :

$$|\mathbb{E}[\hat{I}_{(1)}]| + |\mathbb{E}[(\hat{I}_{(1)})^3]| + |\mathbb{E}[(\hat{I}_{(1)})^5]| + |\mathbb{E}[(\hat{I}_{(1)})^2 - h]| + |\mathbb{E}[(\hat{I}_{(1)})^4 - 3h^2]| \leq Kh^2.$$

983 Two possible choices for  $\hat{I}_{(1)}$  are either  $\hat{I}_{(1)} \sim \mathcal{N}(0, h)$  or  $\hat{I}_{(1)}$  is a three-pointed distributed random  
984 variable with

$$\mathbb{P}[\hat{I}_{(1)} = \pm\sqrt{3h}] = \frac{1}{6}, \quad \mathbb{P}[\hat{I}_{(1)} = 0] = \frac{2}{3}.$$

985 The rest follows from the above calculations:

$$\hat{I}_{(0,1)} = \frac{1}{2}h\hat{I}_{(1)}, \quad i = 0, 1.$$

#### 986 **Third order approximations**

987 One can choose  $\hat{I}_{(1)} \sim \mathcal{N}(0, h)$ ,  $\hat{I}_{(0,1)} \sim \mathcal{N}(0, \frac{1}{3}h^3)$  satisfying  $\mathbb{E}[\hat{I}_{(1)}\hat{I}_{(0,1)}] = \frac{1}{2}h^2$ .

988 Then, one can deduce the following:

$$\begin{aligned}\hat{I}_{(1,0,0)} &= \hat{I}_{(0,1,0)} = \hat{I}_{(0,0,1)} = \frac{1}{6}h^2\hat{I}_{(1)} \\ \hat{I}_{(0,1,1)} &= \hat{I}_{(1,0,1)} = \hat{I}_{(1,1,0)} = \frac{1}{6}h(\hat{I}_{(1)}^2 - h).\end{aligned}$$

989 Thus, we can write the solution weak approximation as

$$\begin{aligned}\mathbf{x}(t) &= \mathbf{x}(s) + f(\mathbf{x}(s), s)h + g(s)\hat{I}_{(1)} + L_t f(\mathbf{x}(s), s)\frac{h^2}{2} + R_2 \\ &\quad + G_t f(\mathbf{x}(s), s)\hat{I}_{(0,1)} + L_t^2 f(\mathbf{x}(s), s)\frac{h^3}{6} + G_t L_t f(\mathbf{x}(s), s)\frac{1}{6}h^2\hat{I}_{(1)} \\ &\quad + L_t G_t f(\mathbf{x}(s), s)\frac{1}{6}h^2\hat{I}_{(1)} + G_t^2 f(\mathbf{x}(s), s)\frac{1}{6}h(\hat{I}_{(1)}^2 - h).\end{aligned}\tag{60}$$

990 An example of such a pair  $(\hat{I}_{(1)}, \hat{I}_{(0,1)}) = (\hat{w}_h, \hat{z}_h)$  can be easily obtained as follows

$$\begin{bmatrix} \hat{w}_h \\ \hat{z}_h \end{bmatrix} = \begin{bmatrix} \sqrt{h} & 0 \\ \frac{h\sqrt{h}}{2} & \frac{h\sqrt{h}}{2\sqrt{3}} \end{bmatrix} \begin{bmatrix} u_1 \\ u_2 \end{bmatrix}, \quad u_1, u_2 \stackrel{\text{i.i.d.}}{\sim} \mathcal{N}(0, 1).$$

991 Indeed, for such a pair we have

$$\mathbb{E} \left[ \begin{bmatrix} \hat{w}_h \\ \hat{z}_h \end{bmatrix} \begin{bmatrix} \hat{w}_h & \hat{z}_h \end{bmatrix} \right] = \begin{bmatrix} h & \frac{h^2}{2} \\ \frac{h^2}{2} & \frac{h^3}{3} \end{bmatrix}.$$

992 In light of the above expression, the truncated Taylor expansions we refer in the main part of the  
 993 paper consists on the consideration of only the coefficients in  $L_t^k$ . The only noise noise contribution  
 994 we will consider corresponds to  $g(s)\hat{I}_{(1)}$ .

995

## 996 E Experiment Details

997 We evaluate the Fréchet inception distance (FID) after generating 50K samples with each solver,  
 998 and compare with the statistics of real-data. In our experiments we make use of the code from [12]  
 999 for continuously trained models as well as their reference FID stats [1] and that of [15] for discretely  
 1000 trained models.

1001 All the experiments of SEEDS for continuous-time models are parameterized within the EDM  
 1002 framework with the discretization of type EDM, linear schedule, and scaling none as described on  
 1003 [12] in noise prediction mode unless explicitly stated. We use the SEEDS-3 method that has 3 NFEs  
 1004 per step and fixed step-size and report FID scores at NFEs divisible by 3.

1005 We leverage the explicit Langevin-like “churn” trick using in [12] to add or remove noise in the  
 1006 sampling phase. Specifically, [12] uses 4 hyper-parameters  $S_{\text{churn}}, S_{\text{min}}, S_{\text{max}}$  and  $S_{\text{noise}}$  in which  
 1007  $S_{\text{churn}}$  controls the overall amount of stochasticity added before giving the input to the SEEDS-3  
 1008 method when the noise level (or time step in EDM configuration)  $t_i$  is contained in the noise interval  
 1009  $[S_{\text{min}}, S_{\text{max}}]$ . It means that the EDM proposed sampler is stochastic under some conditions of those  
 1010 hyper-parameters and deterministic otherwise, while our method is completely stochastic. In our  
 1011 experiments, we set  $S_{\text{churn}} = 0$  except for ImageNet-64 EDM optimized model. We noticed that using  
 1012 the additional stochasticity indeed helps to improve the image quality as in Fig. 1(c). Moreover,  
 1013 setting  $S_{\text{noise}}$  slightly above 1 might correct the errors in earlier steps more effectively as indicated in  
 1014 [12].

1015

### 1016 E.1 Pre-trained model specifications

1017 For producing the CIFAR-10 time-continuous results in Table 1, we use the VP DDPM++ continuous  
 1018 architecture. These models are publicly available in conditional [2] and unconditional [3] versions and  
 1019 were directly derived from [23] under the Apache 2.0 license. On the unconditional mode (Figure  
 1020 1(a-b)), we first generate the FID curves of 3 types of DPM-Solver (with orders 1, 2 and 3) using  
 1021 the updates from their official implementation [4] in noise prediction mode. Taking profit of the tuning  
 1022 advancements proposed by [12], we used a linear noise schedule with  $\beta_d = 19.1$  and  $\beta_{\text{min}} = 0.1$  that  
 1023 slightly differs from the original parameters from [23] but were proven beneficial. We set the end  
 1024 time of sampling  $\varepsilon$  to  $1e-4$  as recommended by [15, Appendix D.2]. The values of all benchmark  
 1025 models for Figure 1(b) were taken directly from tables provided by [15].

1026 In our FFHQ-64 experiments, we employ the unconditional VP pretrained [5] model provided by [12].

<sup>1</sup><https://nvlabs-fi-cdn.nvidia.com/edm/fid-refs/>  
<sup>2</sup>[https://nvlabs-fi-cdn.nvidia.com/edm/pretrained/baseline/  
 baseline-cifar10-32x32-cond-vp.pkl](https://nvlabs-fi-cdn.nvidia.com/edm/pretrained/baseline/baseline-cifar10-32x32-cond-vp.pkl)  
<sup>3</sup>[https://nvlabs-fi-cdn.nvidia.com/edm/pretrained/baseline/  
 baseline-cifar10-32x32-uncond-vp.pkl](https://nvlabs-fi-cdn.nvidia.com/edm/pretrained/baseline/baseline-cifar10-32x32-uncond-vp.pkl)  
<sup>4</sup><https://github.com/LuChengTHU/dpm-solver>  
<sup>5</sup>[https://nvlabs-fi-cdn.nvidia.com/edm/pretrained/baseline/  
 baseline-ffhq-64x64-uncond-vp.pkl](https://nvlabs-fi-cdn.nvidia.com/edm/pretrained/baseline/baseline-ffhq-64x64-uncond-vp.pkl)

For the CelebA-64 experiments, we use the pre-trained VP unconditional model whose checkpoint<sup>6</sup> is provided by [22]. We use the Type-1 discretization proposed in [15] to ensure compatibility of our method with the prescribed trained steps of such model.

For ImageNet-64, we both use the baseline and the optimized pre-trained models given in [12]. We note that the baseline is trained on the iDDPM class of model (see [12, Tab.1 Col.3] for details), which actually uses different preconditioning and thus the change of variables compared to the optimized model. The Figure 1(c) was obtained using the EDM-preconditioned checkpoint<sup>7</sup>. The added noise settings of SEEDS-3 solver were not subject to a grid-search optimization procedure. The chosen hyper-parameters were  $S_{\text{churn}} = 11$ ,  $S_{\text{noise}} = 1.003$ ,  $S_{\text{min}} = 0.05$ , and  $S_{\text{max}} = 15$  but we are confident that this configuration can be optimized to further improve our results.

## E.2 Noise vs. Data Prediction approaches

In Appendix B of [16], the authors compare DPM-Solver2 and DPM-Solver++(2S), which amounts on comparing in our framework the difference between the obtained exponential integrators for the PFO in the noise and data prediction regimes to detect exactly a coefficient on the non-linear term that is absent in the noise prediction regime. The term they find corresponds exactly to the difference between applying the variation of constants formula before (instead of after) replacing the score function with the desired neural network. In Tab. 2 we report both data and noise prediction SEEDS-3. At low NFEs the DP approach gives better results but stabilizes in high NFEs at a FID score that is worse than the one the NP approach reaches.

Table 2: Comparison between noise prediction  $F_{\theta,t}$  and data prediction  $D_{\theta,t}$  modes of SEEDS-3 on CIFAR-10 (VP uncond. cont.).

| SAMPLING METHOD / NFE    | 9      | 30     | 60    | 90   | 150  | 165         | 180  |
|--------------------------|--------|--------|-------|------|------|-------------|------|
| SEEDS-3 DATA PREDICTION  | 60.75  | 22.42  | 12.47 | 2.95 | 2.51 | 2.54        | 2.55 |
| SEEDS-3 NOISE PREDICTION | 471.29 | 288.20 | 33.92 | 3.76 | 2.40 | <b>2.39</b> | 2.48 |

## E.3 Low vs. High stage Solvers

Similar to DPM-Solver [15], the FID scores in Tab. 3 and 4 show that at low NFEs, higher stage methods performs more poorly while at higher NFEs, DPM-Solver-3 and SEEDS-3 are better than their counterparts with 1 and 2 stages.

## E.4 Deterministic vs. Stochastic Solver

Deterministic solvers as DPM-Solver [15] are fast and well-adapted to applications in which speed is the most concern. As shown in [15], Table 3 and 4, DPM-Solver converges to a local minimum at early steps and cannot be improved in large NFEs. Moreover, preconditioned deterministic solver in EDM gives optimal quality on unconditional CIFAR-10 [12, Fig. 5 (b)]. However, for more complicated datasets as ImageNet-64, the stochasticity indeed helps improve the samples quality [12, Fig. 5 (c)]. We can consider the random noise as a corrector that approaches a better local or even global minimum. At  $S_{\text{churn}} = 0$ , our SEEDS-3 with stochasticity gives lower FID score than EDM deterministic Heun on ImageNet-64 (see Fig. 1(c)). In more detail, for the EDM baseline model, we obtain FID= 2.06 in 210 NFEs, compared to the reported FID= 2.66 at 511 NFEs in [12]. For the EDM-optimized model, our method gives FID=1.66 in 270 NFEs, which is superior to the 2.22 FID score in 511 NFEs [12]. Additionally, SEEDS-3 also reaches the best quality prior to the number steps needed in Euler Maruyama and other solvers as in Table 5.

<sup>6</sup>[https://drive.google.com/file/d/1R\\_H-fJYXSH79wfSKs9D-fuKQVan5L-GR/view?usp=sharing](https://drive.google.com/file/d/1R_H-fJYXSH79wfSKs9D-fuKQVan5L-GR/view?usp=sharing)

<sup>7</sup><https://nvlabs-fi-cdn.nvidia.com/edm/pretrained/edm-imagenet-64x64-cond-adm.pkl>

Table 3: FID comparison between SEEDS (Ours) and DPM-Solver for low NFEs on CIFAR-10 VP uncond. discrete. We recomputed the DPM-Solver score using the "non-deep" model while [15] reports results for the "deep" architecture. The symbol \* is used when using 1 NFE more and † when using 1 NFE less because the given NFE cannot be divided by 2 or 3. This corresponds to Figure 1 (a).

| METHOD / NFE | 10           | 12          | 15           | 20      | 30          | 40      | 50           | 100         |
|--------------|--------------|-------------|--------------|---------|-------------|---------|--------------|-------------|
| DPM-SOLVER-1 | 22.90        | 17.73       | 13.36        | 9.78    | 6.87        | 5.77    | 5.17         | 4.22        |
| DPM-SOLVER-2 | <b>12.22</b> | <b>6.52</b> | <b>*4.55</b> | –       | 3.75        | 3.68    | 3.64         | 3.60        |
| DPM-SOLVER-3 | †66.92       | 9.72        | 5.32         | *3.83   | <b>3.66</b> | –       | <b>*3.61</b> | †3.58       |
| SEEDS-1      | 303.48       | 239.79      | 279.84       | 192.68  | 84.78       | 45.26   | 28.18        | 8.24        |
| SEEDS-2      | 481.09       | 473.48      | *430.98      | 305.88  | 223.01      | 51.41   | 11.10        | <b>3.19</b> |
| SEEDS-3      | †483.04      | 482.19      | 479.63       | *462.61 | 280.48      | †247.44 | *62.62       | †3.53       |

Table 4: FID comparison between SEEDS (Ours) and DPM-Solver for high NFEs on CIFAR-10 VP uncond. discrete. We recomputed the DPM-Solver score using the "non-deep" model while [15] reports results for the "deep" architecture. The symbol \* is used when using 1 NFE more because the given NFE cannot be divided by 2 or 3. This corresponds to Figure 1 (a).

| METHOD / NFE | 150  | 200   | 300  | 510  |
|--------------|------|-------|------|------|
| DPM-SOLVER-3 | 3.59 | *3.58 | –    | 3.58 |
| SEEDS-1      | –    | 4.07  | 3.40 | –    |
| SEEDS-3      | 3.12 | *3.08 | 3.14 | 3.24 |

Table 5: FID comparison between SEEDS-3 (Ours) and other solvers on CIFAR-10 VP uncond. discrete. The symbol \* is used when using 1 NFE more and † when using 1 NFE less because the given NFE cannot be divided by 2 or 3. This corresponds to Figure 1 (b).

| METHOD / NFE   | 10            | 12          | 15          | 20           | 50           | 200          | 1000 |
|----------------|---------------|-------------|-------------|--------------|--------------|--------------|------|
| EULER-MARUYAMA | 278.67        | 246.29      | 197.63      | 137.34       | 32.63        | 4.03         | 3.16 |
| ANALYTIC DDPM  | 35.03         | 27.69       | 20.82       | 15.35        | 7.34         | 4.11         | 3.84 |
| ANALYTIC DDIM  | 14.74         | 11.68       | 9.16        | 7.20         | 4.28         | 3.60         | 3.86 |
| DDIM           | 13.58         | 11.02       | 8.92        | 6.94         | 4.73         | 4.07         | 3.95 |
| DPM-SOLVER-3   | † <b>6.92</b> | <b>9.72</b> | <b>5.32</b> | <b>*3.83</b> | <b>*3.61</b> | *3.58        | –    |
| SEEDS-3        | †483.04       | 482.19      | 479.63      | *462.61      | *62.62       | <b>*3.08</b> | –    |

## E.5 Hardware configuration

During the experiments, we used three Linux-based servers with 60GB memory each and 4 GPUs NVIDIA V100 32GB, 4 GPUs NVIDIA V100 16GB, and 2 GPUs NVIDIA V100 32GB, respectively. Table 6 shows the detail of the configuration utilized for each experiment. We noted that when using the 4 GPUs configuration, the FID results were slightly lower (around 2%), even after using a stacked fixed random seed. We run the experiments multiple times and reported the minimum FID value each time.

## E.6 Licences

Pre-trained models:

- CIFAR-10 models by [23]: Apache V2.0 license
- FFHQ-64 model by [12]: Creative Commons Attribution-NonCommercial-ShareAlike 4.0 International License.

Table 6: Details of GPUs utilized during the experiments.

| EXPERIMENT          | MODEL       | NUMBER | GPU SIZE |
|---------------------|-------------|--------|----------|
| CIFAR-10 CONTINUOUS | NVIDIA V100 | 4      | 16 GB    |
| CIFAR-10 DISCRETE   | NVIDIA V100 | 2      | 32 GB    |
| FFHQ64              | NVIDIA V100 | 4      | 16 GB    |
| CELEBA64            | NVIDIA A100 | 2      | 16 GB    |
| IMAGENET64          | NVIDIA V100 | 4      | 32 GB    |

- CelebA-64 model by [22]: Apache V2.0 license
- ImageNet-64 model by [12]: Apache V2.0 license
- Inception-v3 model by [24]: Apache V2.0 license

## E.7 Supporting samples

In this subsection, we report the image grids supporting our claims in the Experiments section.

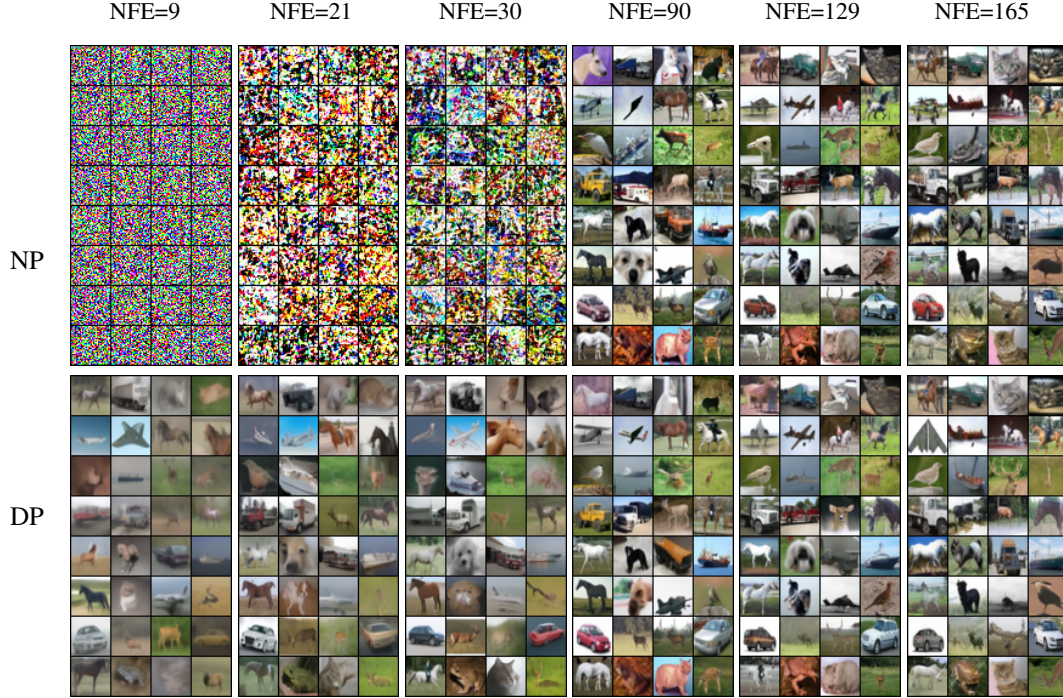

Figure 3: Samples on CIFAR-10 from low to high NFEs by SEEDS-3 in Noise Prediction (NP) and Data Prediction (DP) modes, using conditional VP continuous baseline model [12].



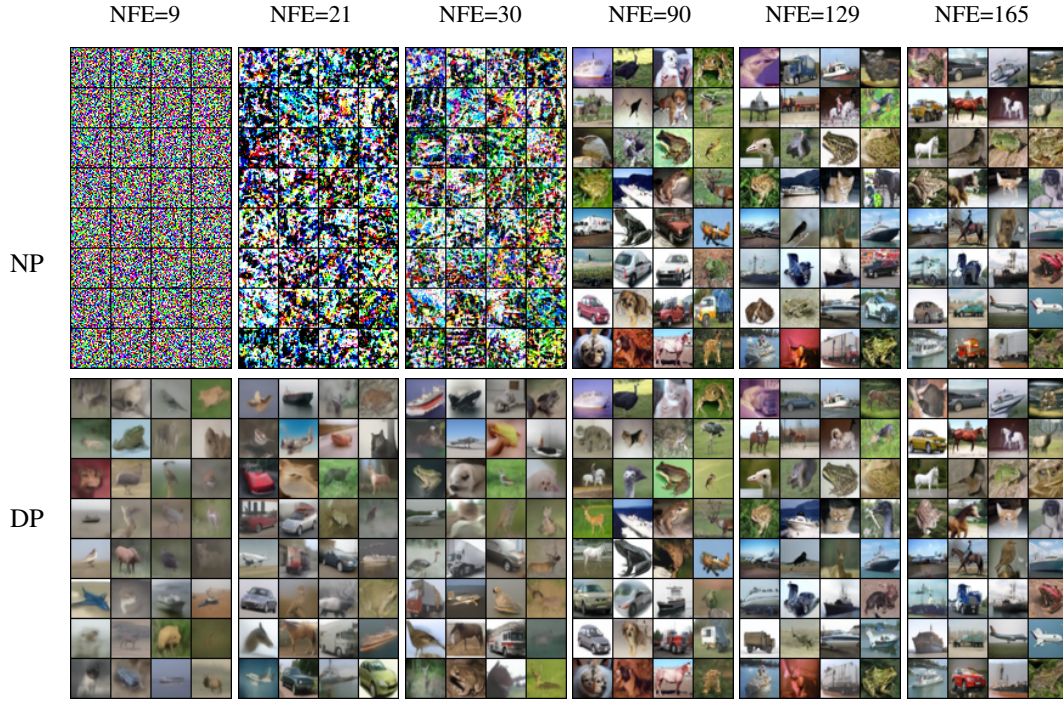

Figure 4: Samples on CIFAR-10 from low to high NFEs by SEEDS-3 in Noise Prediction (NP) and Data Prediction (DP) modes, using unconditional VP continuous baseline model [12].

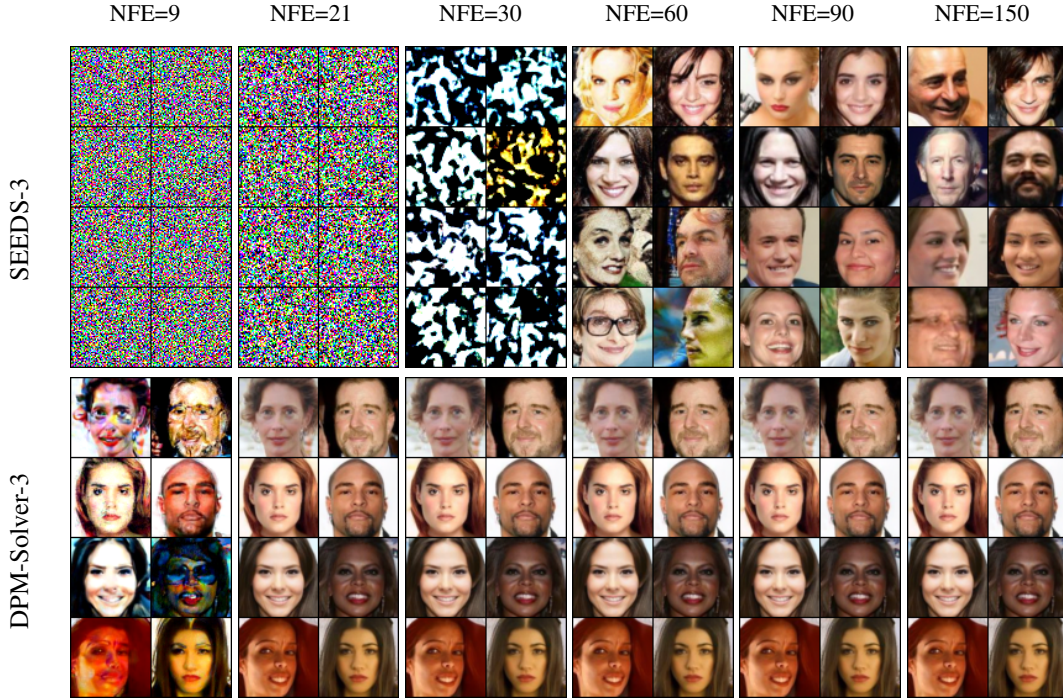

Figure 5: Samples on CelebA-64 from low to high NFEs by SEEDS-3 and DPM-Solver-3, using pre-trained model from [22].



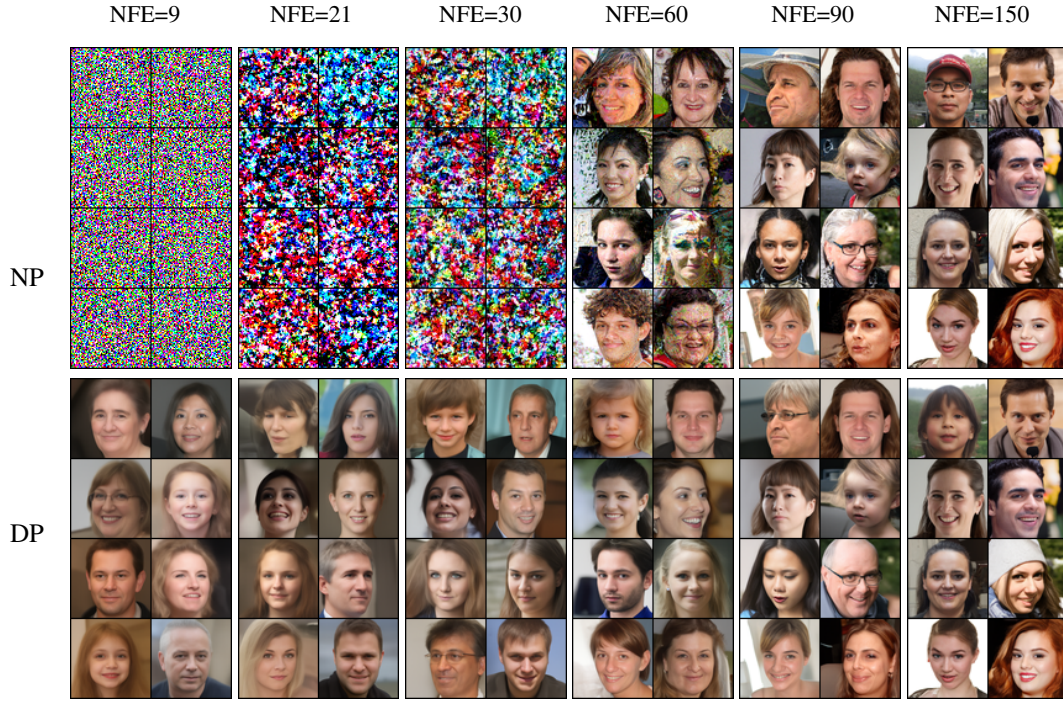

Figure 6: Samples on FFHQ-64 from low to high NFEs by SEEDS-3 in Noise Prediction (NP) and Data Prediction (DP) modes, using unconditional VP continuous baseline model [12].

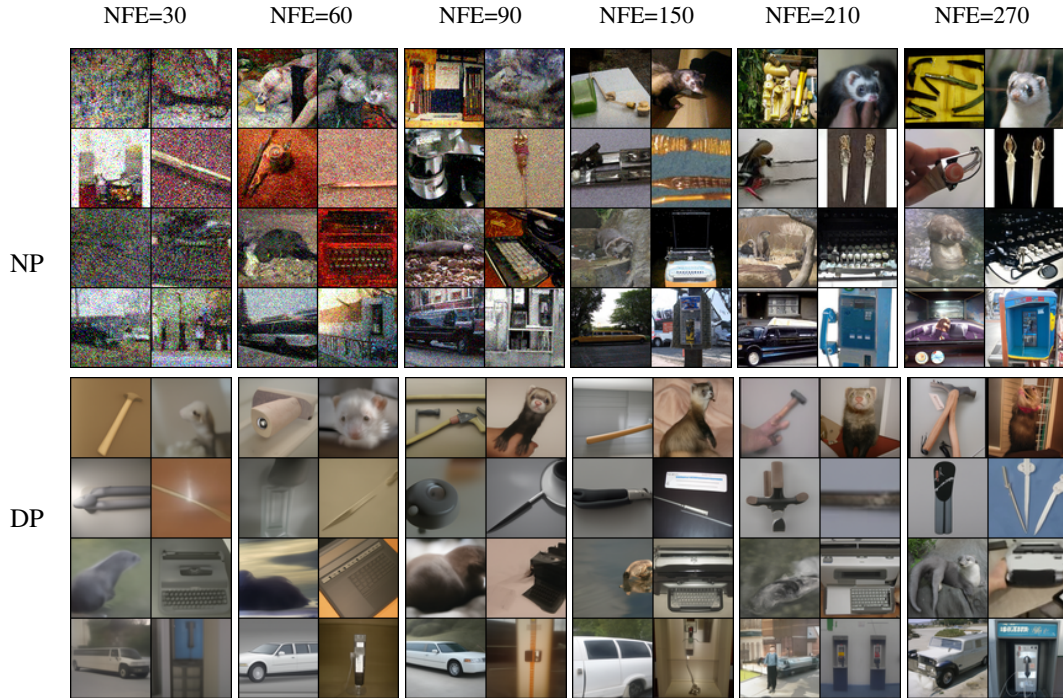

Figure 7: Samples on ImageNet-64 from low to high NFEs in Noise Prediction (NP) and Data Prediction (DP) modes, using conditional EDM optimized model [12].



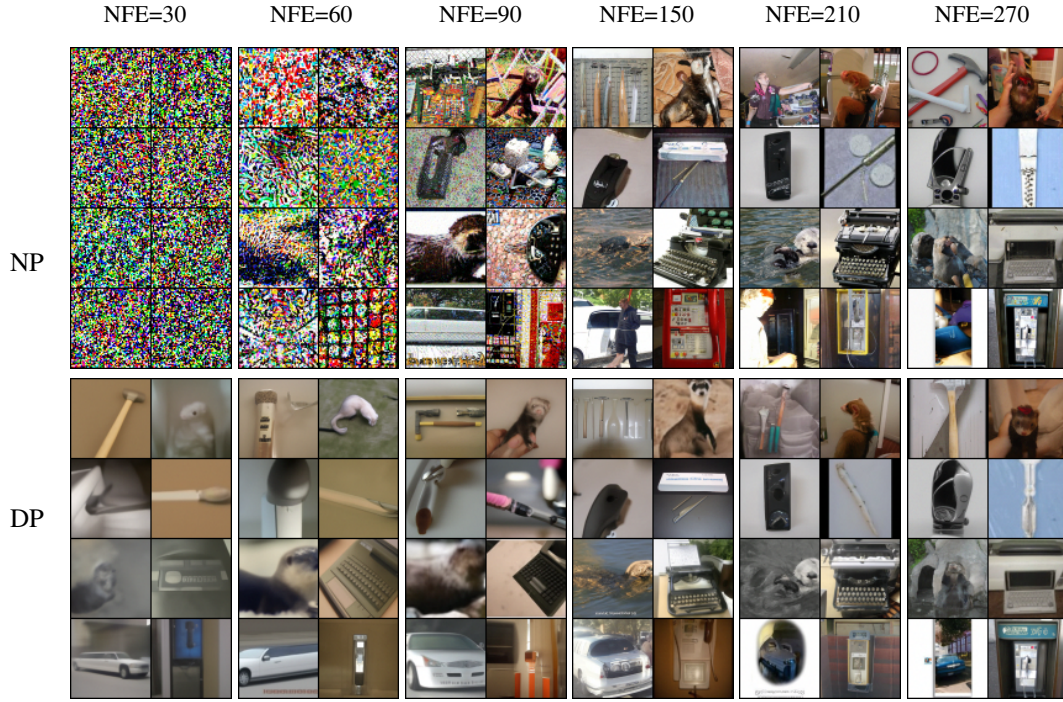

Figure 8: Samples on ImageNet-64 from low to high NFEs in Noise Prediction (NP) and Data Prediction (DP) modes, using conditional EDM baseline model [12].

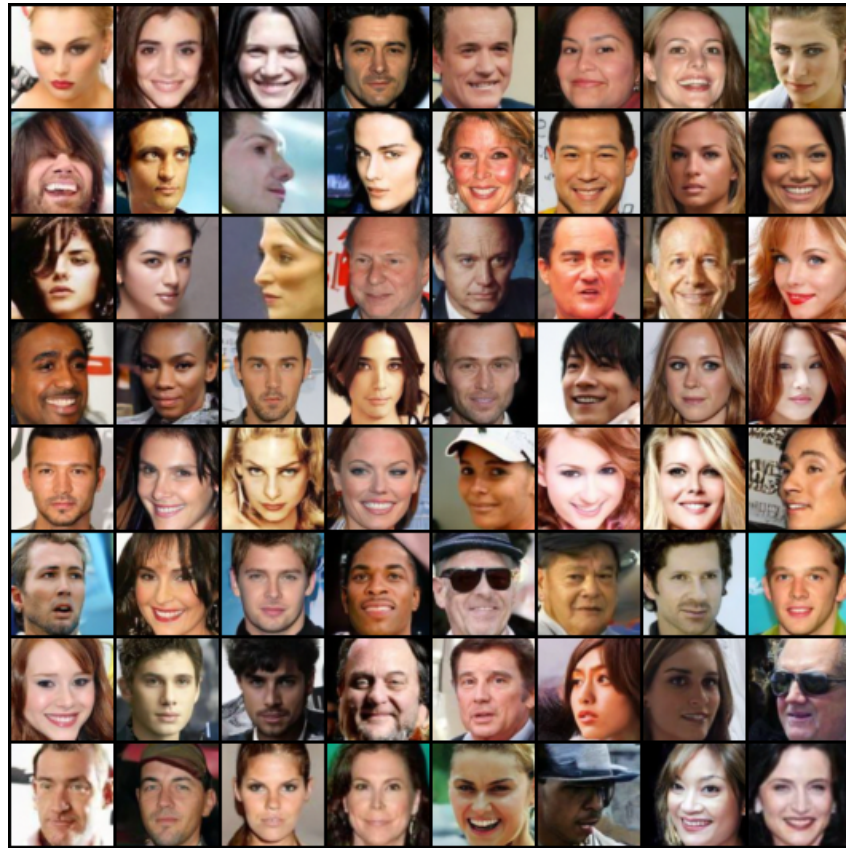

Figure 9: Example of samples on CelebA-64 generated by SEEDS-3 in 90 NFEs, using pre-trained model from [22].

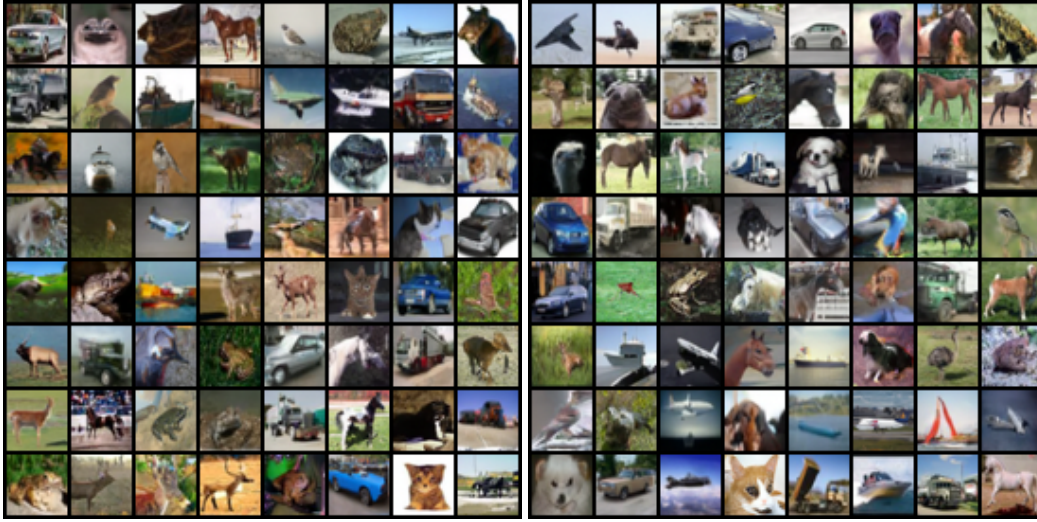

(a) DPM-Solver-3 at 44 NFE.

(b) SEEDS-3 at 201 NFE.

Figure 10: Visual sample quality comparison between DPM-Solver-3 and SEEDS-3 using their optimal settings and unconditional CIFAR-10 discrete model [23].

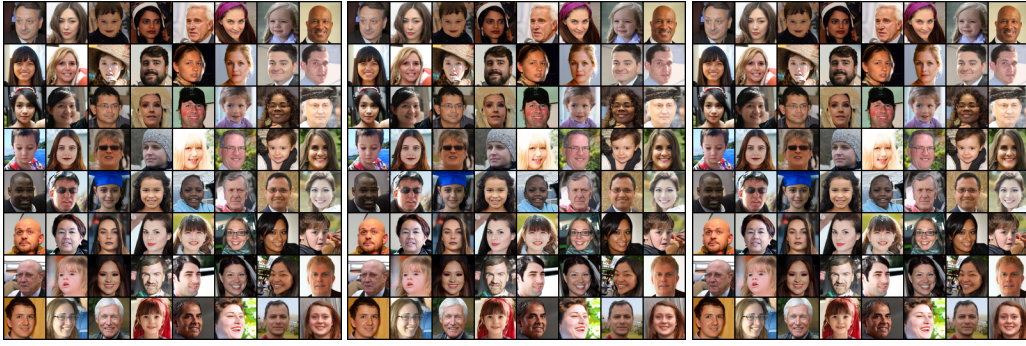

(a) DPM-Solver-3 at 80 NFE.

(b) EDM at 80 NFE.

(c) SEEDS-3 at 150 NFE.

Figure 11: Visual sample quality comparison between DPM-Solver-3, EDM and SEEDS-3 using their optimal settings and unconditional VP FFHQ-64 continuous model [12].

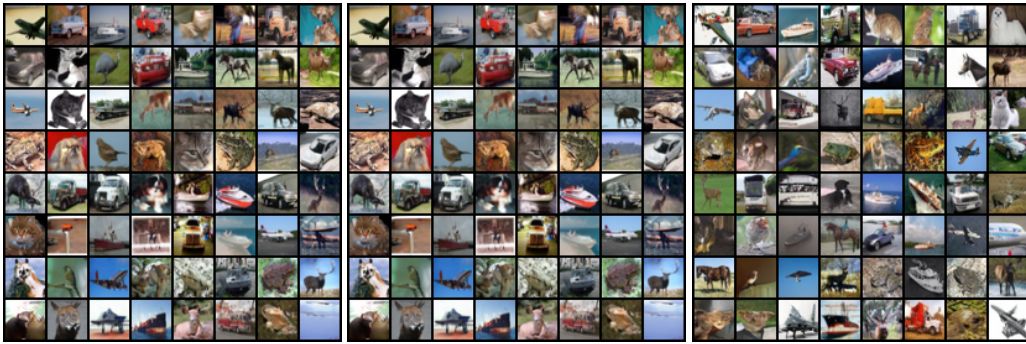

(a) DPM-Solver-3 at 30 NFE.

(b) EDM at 90 NFE.

(c) SEEDS-3 at 150 NFE.

Figure 12: Visual sample quality comparison between DPM-Solver-3, EDM and SEEDS-3 using their optimal settings and conditional VP CIFAR-10 baseline continuous model [12].



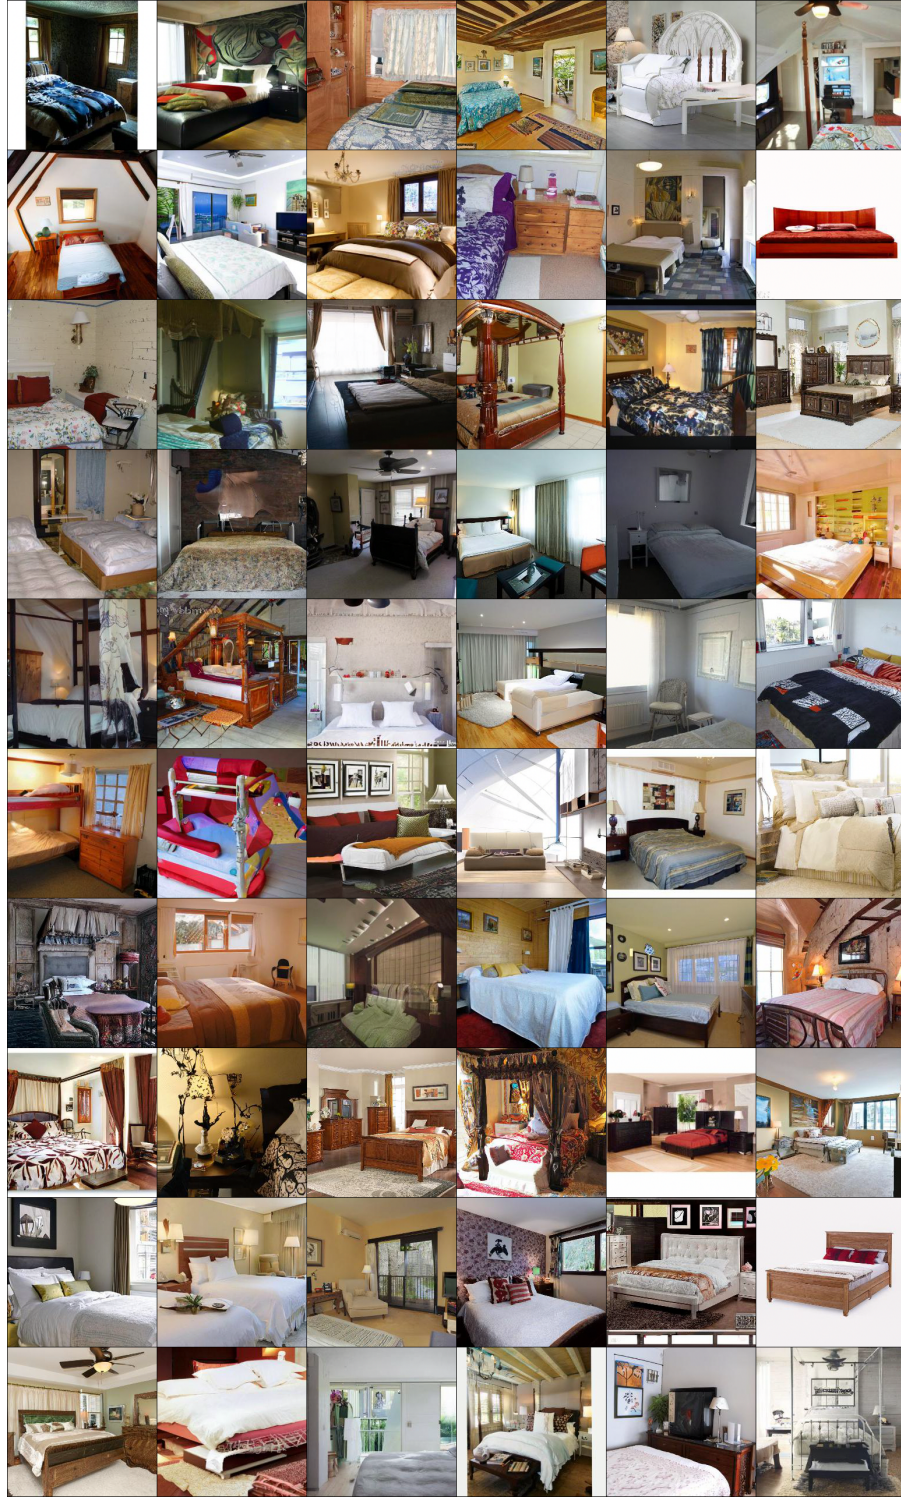

Figure 13: Example of samples on LSUN-Bedroom-256 by SEEDS-3 in 201 NFEs, using pre-trained model from [5].
